# Supplementary material for: An Exercise Training and Healthy Eating Group Program (ATHENA) for Overweight and Obese Women with Urinary Incontinence: An Intervention Description
Source: MDPI journal article supplement (doi:10.3390/healthcare8040575), 2020-12-18
Supplement: s1 [file s1]

# Facilitator's Guide – ATHENA

An Exercise Training and Healthy Eating Group Program

---

## **ATHENA Facilitator's Guide**

Published by the State of Queensland (Queensland Health), 2020

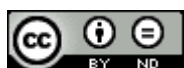

This document is licensed under a Creative Commons Attribution-No Derivatives 4.0 International licence. To view a copy of this licence, visit [creativecommons.org/licenses/by-nd/4.0/](https://creativecommons.org/licenses/by-nd/4.0/)  
© State of Queensland (Queensland Health) 2020

You are free to copy and communicate the work; however, it cannot be shared with others in a modified or adapted form, and you must attribute the State of Queensland (Queensland Health).

For more information contact:

Address: Gold Coast Hospital and Health Service Physiotherapy Department, D Block Ground Floor, 1 Hospital Blvd, QLD 4215. Email: [PTLedPelvicHealthClinicGCUH@health.qld.gov.au](mailto:PTLedPelvicHealthClinicGCUH@health.qld.gov.au). Phone: +61 5687 3027.

### **Disclaimer:**

The content presented in this publication is distributed by the Queensland Government as an information source only. The State of Queensland makes no statements, representations or warranties about the accuracy, completeness or reliability of any information contained in this publication. The State of Queensland disclaims all responsibility and all liability (including without limitation for liability in negligence) for all expenses, losses, damages and costs you might incur as a result of the information being inaccurate or incomplete in any way, and for any reason reliance was placed on such information.

---

# Contents

|                                                                           |     |
|---------------------------------------------------------------------------|-----|
| Contents .....                                                            | iii |
| <br>                                                                      |     |
| 1. The ATHENA Facilitator's Guide .....                                   | 1   |
| 2. What is ATHENA? .....                                                  | 2   |
| 2.1. Overview.....                                                        | 2   |
| 2.2. Components.....                                                      | 2   |
| 2.3. Program Length .....                                                 | 2   |
| 3. Introductory Session (first attendance) .....                          | 3   |
| 3.1. Overview.....                                                        | 3   |
| 3.2. Learning Outcomes .....                                              | 3   |
| 4. General Exercise Training (Week 1-12).....                             | 4   |
| 4.1. Overview.....                                                        | 4   |
| 4.2. Learning Outcomes .....                                              | 4   |
| 4.3. Participant Workbook Topic .....                                     | 4   |
| 4.4. Group Activity .....                                                 | 4   |
| 4.5. Key Messages .....                                                   | 5   |
| 5. Pelvic Floor Muscle Training (Week 1-12) .....                         | 6   |
| 5.1. Overview.....                                                        | 6   |
| 5.2. Learning Outcomes .....                                              | 6   |
| 5.3. Participant Workbook.....                                            | 6   |
| 5.4. Group Activity .....                                                 | 6   |
| 5.5. Key Message .....                                                    | 6   |
| 6. Pelvic Health Education (Week 1-4) .....                               | 7   |
| 6.1. Overview.....                                                        | 7   |
| 7. Powerful Pelvis: keeping you strong .....                              | 8   |
| 7.1. Learning Outcomes .....                                              | 8   |
| 7.2. Participant Workbook Topic .....                                     | 8   |
| 7.3. Group Activity .....                                                 | 8   |
| 7.4. Key Message .....                                                    | 8   |
| 8. Beautifully Behaved Bladder: keeping you in control .....              | 9   |
| 8.1. Learning Outcomes .....                                              | 9   |
| 8.2. Participant Work .....                                               | 9   |
| 8.3. Group Activity .....                                                 | 9   |
| 8.4. Key Message .....                                                    | 9   |
| 9. Terrific No. Two's: keeping you regular.....                           | 10  |
| 9.1. Learning Outcomes .....                                              | 10  |
| 9.2. Participant Workbook.....                                            | 10  |
| 9.3. Group Activity .....                                                 | 10  |
| 9.4. Key Message .....                                                    | 10  |
| 10. Learning to Link: keeping you in tune with your body as a whole ..... | 11  |
| 10.1. Learning Outcomes .....                                             | 11  |
| 10.2. Workbook Topics.....                                                | 11  |

---

|                                                      |    |
|------------------------------------------------------|----|
| 10.3. Group Activity .....                           | 11 |
| 10.4. Key Message .....                              | 11 |
| 11. Healthy Eating Education (Week 1-4) .....        | 12 |
| 11.1. Overview .....                                 | 12 |
| 12. Enjoy Eating .....                               | 13 |
| 12.1. Learning Outcomes .....                        | 13 |
| 12.2. Workbook Topics .....                          | 13 |
| 12.3. Group Activity .....                           | 13 |
| 12.4. Key Message .....                              | 13 |
| 13. Powerful Portions .....                          | 14 |
| 13.1. Learning Outcomes .....                        | 14 |
| 13.2. Workbook Topic .....                           | 14 |
| 13.3. Group Activity .....                           | 14 |
| 13.4. Key Message .....                              | 14 |
| 14. Shop 'til You Drop .....                         | 15 |
| 14.1. Learning Outcomes .....                        | 15 |
| 14.2. Workbook Topics .....                          | 15 |
| 14.3. Group Activity .....                           | 15 |
| 14.4. Key Message .....                              | 16 |
| 15. Mood and Food .....                              | 17 |
| 15.1. Learning Outcomes .....                        | 17 |
| 15.2. Workbook Topics .....                          | 17 |
| 15.3. Group Activity .....                           | 17 |
| 15.4. Key Message .....                              | 17 |
| 16. Appendix .....                                   | 18 |
| 16.1. Station 1: Upper Body Exercises .....          | 18 |
| 16.2. Station 2: Lower Body Exercises .....          | 18 |
| 16.3. Station 3: Balance and Jumping Exercises ..... | 18 |
| 16.4. Station 4: Aerobic Exercises .....             | 18 |
| 16.5. Station 5: Abdominal Exercises .....           | 18 |
| 16.6. Shopping Label .....                           | 18 |
| 17. Abbreviations .....                              | 19 |
| 18. References .....                                 | 20 |

# 1. The ATHENA Facilitator's Guide

The ATHENA Facilitator's Guide is a tool for use by clinicians, to guide implementation and delivery of the ATHENA intervention by appropriately trained Physiotherapists and Dietitians working in Continence and Women's Health.

For each component of the ATHENA intervention, the Facilitator's Guide outlines:

- A checklist of learning outcomes
- Reference to complementing Participant Workbook Topic
- Recommended group activities
- A summary of key messages

It is recommended that each health service utilise appropriate and accessible technology and educational resources to complement ATHENA delivery. These have been purposely excluded from the ATHENA Facilitator's Guide as new resources are constantly emerging and evolving. The Facilitator's Guide is designed to complement the ATHENA Participant Workbook.

---

## 2. What is ATHENA?

### 2.1. Overview

An Exercise Training and Healthy Eating Group Program (ATHENA) was co-developed by the ATHENA research team, which comprised of multidisciplinary clinicians, researchers and a consumer representative. It is informed by evidence-based clinical practice guidelines, which recommend supervised pelvic floor muscle training (PMFT) and weight loss for overweight and obese women with urinary incontinence.

### 2.2. Components

ATHENA consists of four components delivered over a 12-week period:

- Pelvic floor muscle training (PFMT)<sup>a</sup>
- General exercise training<sup>b</sup>
- Pelvic health education<sup>c</sup>
- Healthy eating education<sup>b</sup>

<sup>a</sup>PFMT: Strong recommendation; high quality evidence

<sup>b</sup>Weight loss through diet and exercise: Strong recommendation; moderate quality evidence

<sup>c</sup>Pelvic education: Moderate quality evidence (1)

### 2.3. Program Length

The PFMT and general exercise training run weekly for 12 weeks, while the pelvic health and healthy eating education sessions run weekly for four weeks (Figure 1).

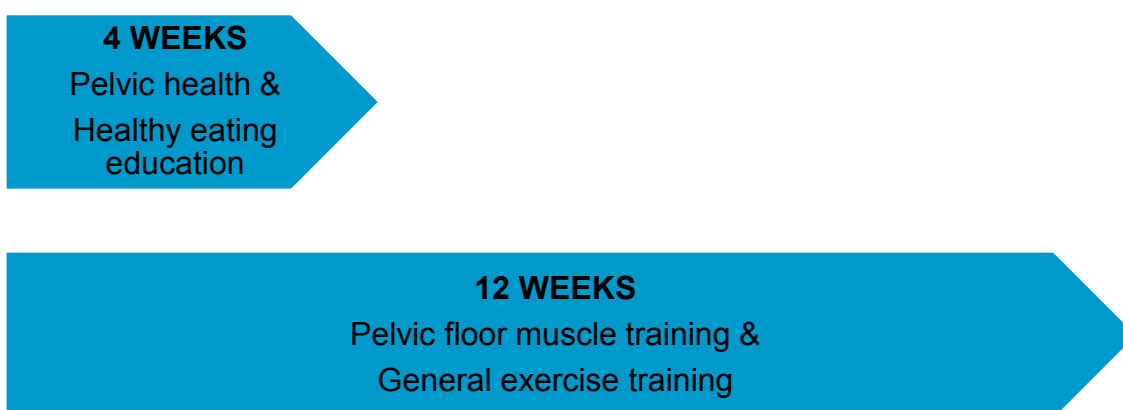

Figure 1: Timeline of the ATHENA participant journey and components

---

## 3. Introductory Session (first attendance)

### 3.1. Overview

At participants' first ATHENA attendance (or prior to), it is recommended to provide a general introduction to the ATHENA intervention, including its purpose/goal, intervention components and how they are delivered to participants, including date, time and location of sessions.

### 3.2. Learning Outcomes

Learning outcomes will be addressed at the introductory session of ATHENA and during each of the four ATHENA components each week. By the end of the ATHENA introductory session, participants will:

- Understand the ATHENA program structure and requirements; and
- Be familiar with the ATHENA participant workbook, in particular an understanding of the guiding principles to ***Let their inner ATHENA shine (page 3)***.

---

## 4. General Exercise Training (Week 1-12)

### 4.1. Overview

The general exercise training advice and practical components of ATHENA will complement the healthy eating education sessions, focusing on lifestyle modification and behaviour change to increase participation in meaningful physical activity to assist weight loss (1).

### 4.2. Learning Outcomes

By the end of ATHENA, participants will have an increased understanding of:

- The role of increased weight on UI;
- The cyclic relationship between UI, increased weight and physical activity avoidance;
- Recommended weight loss to improve UI, supported by evidence-based guidelines;
- Participants' own current physical activity habits;
- Dosage, intensity and type of exercise recommended to achieve modest weight loss;
- The importance of enjoyment, satisfaction, practicality, accessibility, affordability and variety in movement selection for greater long-term success;
- Individual short and long-term goals for healthier physical activity habits; and
- How to integrate PFMT into their physical activity program.

### 4.3. Participant Workbook Topic

**The 'M' Words: Move More! (page 4) and My General Exercise Training Diary (page 32)** will be discussed at the ATHENA introductory session and revisited at the start of each general exercise training session. This aims to aid participants' adherence to their exercise programs, through goal setting and celebration of goal achievements, identification of any non-optimal training doses and motivational interviewing to challenge physical activity behaviours.

### 4.4. Group Activity

The general exercise training session will include 30 minutes of group-based physical activity in a physiotherapy gym, supervised by a physiotherapist +/- physiotherapy assistant. Prior to each session, the physiotherapist should demonstrate each exercise (including any equipment to be used) and point out emergency call buttons and procedures. Exercises should be modified as required, with an emphasis on integration of PFMT into the general exercise training session. Exercise cards (see Appendix 1) can be used as a visual resource at each exercise station, and be provided as a home-exercise program resource.

The group general exercise training session will include:

- 5-minute warm-up
- 20-minutes of physical activity including high intensity interval training as follows:
  - Three repetitions of 45-second work to a 15-second rest ratio through five stations.
  - Each station targets a different exercise type: 1) Cardio; 2) Upper body; 3) Lower body; 4) Abdominal; and 5) Balance and Jumping; with three options for levels of difficulty for participants to choose from.
  - Change exercises weekly for variety.
- 5-minute cool-down



---

## 4.5. Key Messages

'Moving more' strengthens pelvic muscles and helps with weight loss; and this in turn can reduce UI.

The best exercises are the ones you enjoy!

---

## 5. Pelvic Floor Muscle Training (Week 1-12)

### 5.1. Overview

Supervised PFMT is recommended as first line management for UI (1). PFMT advice and practical components will complement pelvic health education topics and should be integrated into the general exercise training program.

### 5.2. Learning Outcomes

By the end of ATHENA, participants will have an increased understanding of:

- Pelvic floor muscle (PFM) anatomy and function in everyday tasks (sit-stand, walking, cough, sneeze, voiding, defecation, sexual health);
- Common pathophysiology and risk factors for PFM dysfunction (childbirth, pelvic surgery, constipation, change of life, ageing, occupation);
- PFM assessment methods (vaginal examination, external palpation, transabdominal ultrasound);
- Measuring PFMT success, including an individualised intensive supervised 12-week training program, using training principles of specificity, overload, recovery, maintenance and functional integration.

### 5.3. Participant Workbook

The ***Pelvic Muscle (Trampoline) Training (page 6)*** and ***Training Diary (page 33)*** will be discussed at the ATHENA introductory session and revisited at the start of general exercise training sessions to aid adherence. Motivational interviewing techniques and checking of this diary are important to encourage PFMT adherence, identify any non-optimal training doses, and (in consultation with participants) reflect and negotiate PFMT structure, including timing, frequency, position, repetitions, complexity, functional integration, and daily awareness. Be sure to explore participants' understanding of their diagnosis and symptoms; beliefs about their behaviours and consequences of inaction; beliefs about treatment options (e.g. PFMT, surgery); and common barriers (family, work, finances, other), and link to specific participant goals.

### 5.4. Group Activity

A group PFMT session will be completed during warm-up and cool-down of general exercise training sessions. This will include:

- Strength (high intensity, short duration): five repetitions of high intensity, short contractions, holding for up to 1-3 seconds
- Endurance (low intensity, long duration): five repetitions of low speed, sub-maximal duration contractions, holding up to 15 seconds (or equivalent breaths);
- Power (speed x strength): ten rapid contractions;
- Functional: contractions with functional movement (e.g. squat, cough, lift).

### 5.5. Key Message

A daily, 12-week PFMT program that is individualised and challenging can increase strength, endurance and function of PFMs, which in turn can reduce UI.

---

## 6. Pelvic Health Education (Week 1-4)

### 6.1. Overview

Knowledge about PFM functionality has been shown to reduce symptoms of PFM dysfunction and improve quality of life (2). Four key topics will be covered in these education sessions:

- Powerful Pelvis (stress urinary incontinence)
- Beautifully Behaved Bladder (urinary frequency, urinary urgency, urge urinary incontinence and nocturia)
- Terrific Number Twos (good bowel habits)
- Learning to Link (reflection, review and linking of key concepts)

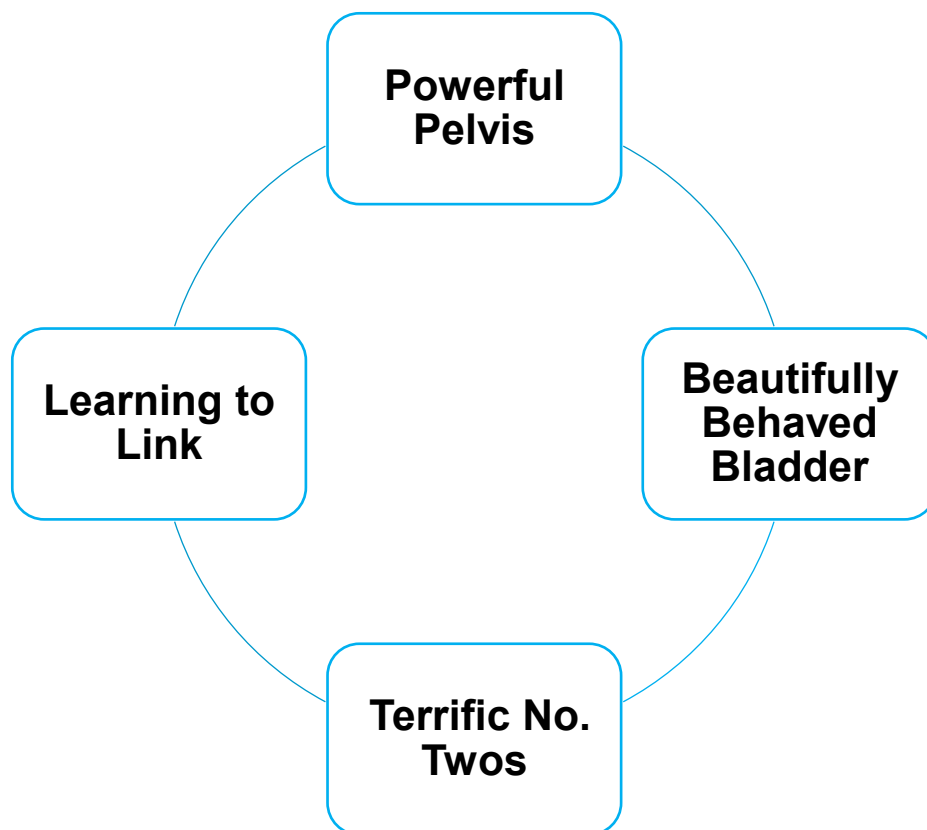

---

## 7. Powerful Pelvis: keeping you strong

### 7.1. Learning Outcomes

By the end of this session, participants will have an increased understanding of:

- The definition, prevalence, pathophysiology, and modifiable and non-modifiable risk factors for stress urinary incontinence (SUI), with less focus on tissue structure damage and more focus on optimising PFM function;
- PFMT principles for SUI;
- The role of increased weight on SUI;
- The cyclic relationship between SUI, weight gain and physical activity avoidance; and
- Recommended weight loss supported by evidence-based guidelines to improve SUI.

### 7.2. Participant Workbook Topic

***Powerful Pelvis – keeping you strong (page 9)*** will be discussed during this first pelvic health education session, with reference to: ***Pelvic Muscle (Trampoline) Training (page 6)***, ***Training Diary (page 33)***, ***‘M’ Words: Move More! (page 4)*** and ***My General Exercise Training Diary (page 32)***.

### 7.3. Group Activity

- Round table discussion and documentation in Participant Workbook on take home messages, something new learnt, sharing stories/personal experiences of SUI (challenges, goal setting, celebration of achievements etc.); and
- Action plan for next week (I plan to...; I did...).

### 7.4. Key Message

Create a routine of daily exercises (PFMT and general exercise) “lifercise”!

---

## 8. Beautifully Behaved Bladder: keeping you in control

### 8.1. Learning Outcomes

By the end of this session the participants will have an increased understanding of:

- Normal bladder anatomy and function;
- Definition, prevalence, pathophysiology and contributing factors to urinary frequency, urinary urgency, urge urinary incontinence, and nocturia;
- Assessing urinary frequency, urinary urgency, urge urinary incontinence and nocturia (including importance of proof of cure and bladder diary); and
- Conservative management strategies for urinary frequency, urinary urgency, urge UI and nocturia, including good bladder habits, bladder retraining, and fluid advice.

### 8.2. Participant Work

***Beautifully behaved bladder (page 10)*** will be discussed during this pelvic health education session.

### 8.3. Group Activity

- Round table discussion and documentation in workbook on take home messages, something new learnt, and sharing stories/personal experiences of urinary frequency, urinary urgency, urge UI, and nocturia (e.g. challenges, goal setting, celebration of achievements etc.);
- Emphasis on motivational interviewing regarding thoughts/actions (not just physical responses) with urinary frequency, urinary urgency, urge UI and nocturia (e.g. what are you *thinking* when you have a bladder urgency? What are your friends/family *response* to you at this time?);
- Identification of triggers and trigger management plan; and
- Action plan for next week (I plan to...; I did...).

### 8.4. Key Message

Small changes in lifestyle and habits can lead to big results!

---

## 9. Terrific No. Two's: keeping you regular

### 9.1. Learning Outcomes

By the end of this session the participants will have an increased understanding of:

- Normal bowel function and stool types;
- The definition, pathophysiology and risk factors contributing to bowel dysfunction (i.e. constipation, faecal and flatal frequency, urgency and incontinence);
- Assessment of bowel dysfunction (including bowel diary, food diary, fibre count);
- How the bowel affects the bladder; and
- Conservative management strategies for bowel dysfunction, including morning routine, defecation dynamics, stool consistency, fibre and fluid advice, and aperients.

### 9.2. Participant Workbook

***Terrific No. Twos: keeping you regular (page 11)*** will be discussed during this pelvic health education session.

### 9.3. Group Activity

- Round table discussion for participants to share their personal experiences of bowel function and dysfunction;
- Practice of defecation dynamics; and
- Action plan for next week using the Participant Workbook (I plan to...; I did...).

### 9.4. Key Message

The bowel can influence the bladder!

---

# 10. Learning to Link: keeping you in tune with your body as a whole

## 10.1. Learning Outcomes

By the end of this session the participants will have:

- Recalled, reviewed and linked key concepts from the three previous topics: 1) Powerful Pelvis, 2) Beautifully Behaved Bladder, and 3) Terrific No. Twos;
- A better understanding of the relationship between prolapse, urinary and bowel dysfunction;
- A better understanding of the relationship between sleep and the hormones involved in weight control, and of sleep hygiene strategies; and
- Reflected and created a long-term action plan to “stay on track”.

## 10.2. Workbook Topics

**Learning to Link: keeping you in tune with your body as whole (page 13), Healthy Sleep Habits (page 28), Healthy Sleep + Healthy Stress = Happy Hormones (page 29) and Staying on track (page 30)** will be discussed during this pelvic health education session.

## 10.3. Group Activity

- Bladder, bowel and exercise quiz to assess retention of information, share key messages and personal stories; and
- Healthy sleep habits action plan for next week (I plan to...; I did...).

## 10.4. Key Message

Healthy eating + healthy exercise + healthy sleep = achieving your inner ATHENA!

---

# 11. Healthy Eating Education (Week 1-4)

## 11.1. Overview

The Healthy Eating and Lifestyle Program (HELP) has been shown to support improvements in quality of life, self-efficacy and moderate weight loss (3). Four key topics will be covered in these education sessions:

- Enjoy Eating (healthy eating habits)
- Powerful Portions (meal planning and portion control)
- Shop Til You Drop (informed choices at the supermarket)
- Mood and Food (mindful eating)

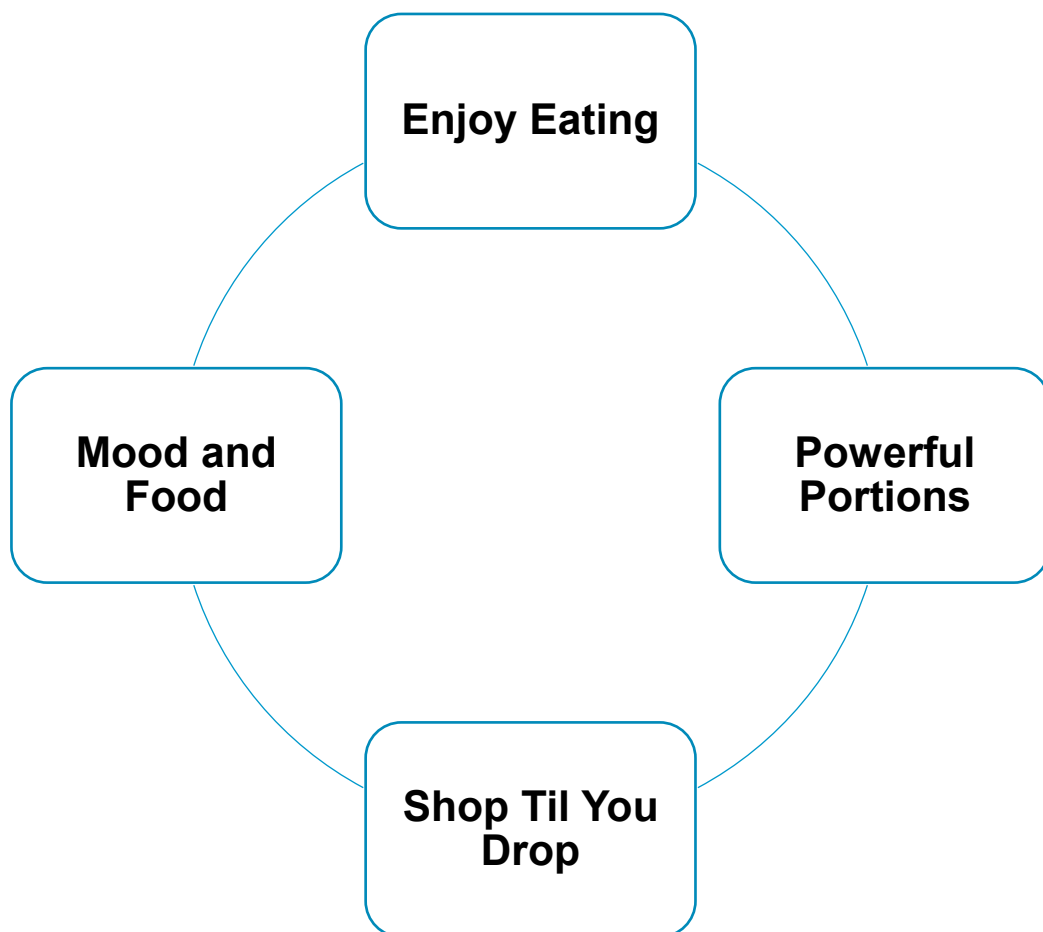



---

## 12. Enjoy Eating

### 12.1. Learning Outcomes

By the end of this session the participants will have an increased awareness/understanding of:

- Their current eating habits;
- The importance of enjoyment, satisfaction, variety, balance and moderation in a healthy diet, and how to achieve this;
- The Australian Guide to Healthy Eating and how it can be applied to everyday eating;
- How best to plan their daily eating patterns, using the five food groups; and
- Their own short-term goals for healthier eating habits.

### 12.2. Workbook Topics

*Enjoying Healthy Eating (pages 16-19)* is based on the Australian Guide to Healthy Eating.

### 12.3. Group Activity

- Use the Australian Guide to Healthy Eating to discuss: the five food groups, why they are required for good health, serving sizes and recommended serves/day (including example serves) and sometimes foods;
- Group discussion on dieting, including views of good/bad foods, with the aim to seek agreement from the group to talk about food in morally neutral ways (not good or bad);
- Use 'My Current Eating habits' checklist to identify goals and an action plan. Key areas to consider include: regular meals, food groups, portion sizes, 'sometimes' foods, avoid counting calories, healthier drinks, appetite and fullness and preparing meals.

### 12.4. Key Message

Change lifelong eating habits by getting back in touch with your natural eating style. The way to do this is through: enjoyment, satisfaction, variety and balance.

---

## 13. Powerful Portions

### 13.1. Learning Outcomes

By the end of this session the participants will understand:

- How to plan their meals and daily eating patterns;
- Ideas and tips for quick and healthy meals; and
- Tips for grocery shopping.

### 13.2. Workbook Topic

**Powerful Portions (pages 20-22)** outlines the importance of having a meal plan and will inform supermarket shopping. Although the process takes time and effort at first, it reduces decisions required during the week and will lead to better eating practices.

### 13.3. Group Activity

- Demonstration of: ways to set up an 'eat less' environment: use dinner-ware and food models of different sizes to visually demonstrate concepts; ask participants which glass (short or tall) will hold more and have them pour into a measuring jug to check capacity; and demonstrate re-bagging snacks in smaller portions and putting the rest away.
- Using plate and food models, plan a balanced breakfast and lunch, and from this create a shopping list. Discuss advantages of eating for satisfaction, kJ intake, nutrition and reduced cravings.
- Ask a participant to volunteer their goal for the coming week. Demonstrate to the group how to translate this goal into an Action Plan. Ensure the goal is specific, measurable, achievable and realistic; that barriers and solutions to barriers have been considered; and have participants decide on a non-food reward for when they achieve their goal.
- Discuss with participants if they have noticed an increase in portion sizes over the years. What have they noticed? Why have they increased? If they haven't noticed, they might be eating more without realizing. Discuss common pitfalls for overeating: buying the larger size because it is better value for money; plate clearing; eating quickly, taking larger bites, not chewing thoroughly (satiety increases with the amount of chewing); and eating straight from a packet or container.

### 13.4. Key Message

Planning ahead and being aware of portion sizes will save time, effort, and stress; and will help turn healthy food options into easy food choices!

---

# 14. Shop ‘til You Drop

## 14.1. Learning Outcomes

By the end of this session, participants will have an increased awareness/understanding of:

- The pitfalls of supermarket shopping;
- Food groups, including being able to distinguish a ‘sometimes’ food by assessing the fat, sugar, fibre and salt content listed on the nutrition panel;
- The concept of energy density, including being able to use the energy content of a product to decide on an appropriate portion size and how (if at all) it fits into their daily meal plan; and
- Relying less on nutrition claims on products (and more on the nutrition panel) when making product choices.

## 14.2. Workbook Topics

**Shop Til You Drop (page 23)** describes how the way we manage shopping directly influences what we eat, and how some simple preparation and awareness of what we are buying can assist with achieving healthy eating goals.

## 14.3. Group Activity

- Discuss food shopping within food groups/recommended daily serves; and demonstrate the concept of energy density using energy-dense food (e.g. 100g nuts ~3000kJ vs. 100g apple ~200kJ). Note that: fruit and vegetables are excellent sources of fibre, potassium, folate, vitamins A and C. Meat, chicken, eggs are excellent source of protein, iron, zinc and vitamin B. Legumes are a good source of fibre and protein and can be used as a meat substitute or as a vegetable. Fish is a good source of omega-3 fats, with nutritional benefits for heart health, and is recommended 2-3 times/week. Breads and cereals are good sources of B vitamins and provide energy in the form of carbohydrate. Milk and dairy products are high in calcium, protein and vitamin B. Sometimes foods comparison to fruit and vegetables (i.e. discuss energy vs. nutrient density).
- Label reading, like any new skill, requires practice to get better and quicker at it. You can practice label reading at home when making meals.
- Work through hints for successful shopping: avoid shopping when you are hungry (to reduce impulse buying); keep to your shopping list; stick to the perimeter of the store (this is where you’ll find fresh and less processed items); shop once a week for groceries and more regularly for fresh produce (fruit, vegetables, milk, bread); for better quality and value for money, buy in-season produce (for out-of-season produce compare frozen and canned product prices); beware of supermarket specials (i.e. buying items you don’t really need); beware of multi-buy promotions (especially important for the ‘sometimes’ foods you are trying to eat in smaller amounts).

---

### 14.4.Key Message

When you can confidently assess a product by its nutrition panel, you can make an informed choice about whether you want to include it in your eating plan. Enjoy Eating (healthy eating habits).

---

# 15. Mood and Food

## 15.1. Learning Outcomes

By the end of this session, participants will have an understanding of:

- The difference between stomach hunger and emotional hunger;
- Ways to recognise and manage cravings and emotional “non-hungry” eating; and
- Practicing the skill of mindfulness and how it can benefit health.

## 15.2. Workbook Topics

***Mood and Food (pages 24-28)*** outlines how our thoughts and feelings can impact positively and negatively on the many dietary choices we make each day.

## 15.3. Group Activity

- Discuss hunger: the sensation and what it means, differences (stomach vs. throat), our ability to override our internal sensations, plate clearing (when the serve is more than we need) and eating as a reward or to self-soothe.
- Discuss mindfulness: what it is, health benefits, and that it requires practice to master.
- Discuss non-mindful munching: eating past the point of satisfaction; grazing, bingeing, nibbling, picking; triggers (places, situations, people, thoughts and feelings); the dieting cycle.
- Discuss strategies to manage non-mindful eating (managing cravings and emotions).

## 15.4. Key Message

You can improve poor eating habits by increasing your awareness of non-mindful eating, caring for yourself through listening to your hunger cues and mindfully enjoying the experience of eating and drinking!

---

## **16. Appendix**

**16.1. Station 1: Upper Body Exercises**

**16.2. Station 2: Lower Body Exercises**

**16.3. Station 3: Balance and Jumping Exercises**

**16.4. Station 4: Aerobic Exercises**

**16.5. Station 5: Abdominal Exercises**

# Biceps (level 1) –alternate arms

## Start position:

Stand upright with feet apart

Hold dumbbell in each hand at side of body

Face palms forwards

## Movement:

Bend one elbow keeping hand weight straight

Slowly lower hand down again

Repeat with the other arm

## Key points:

Keep elbows at side of body

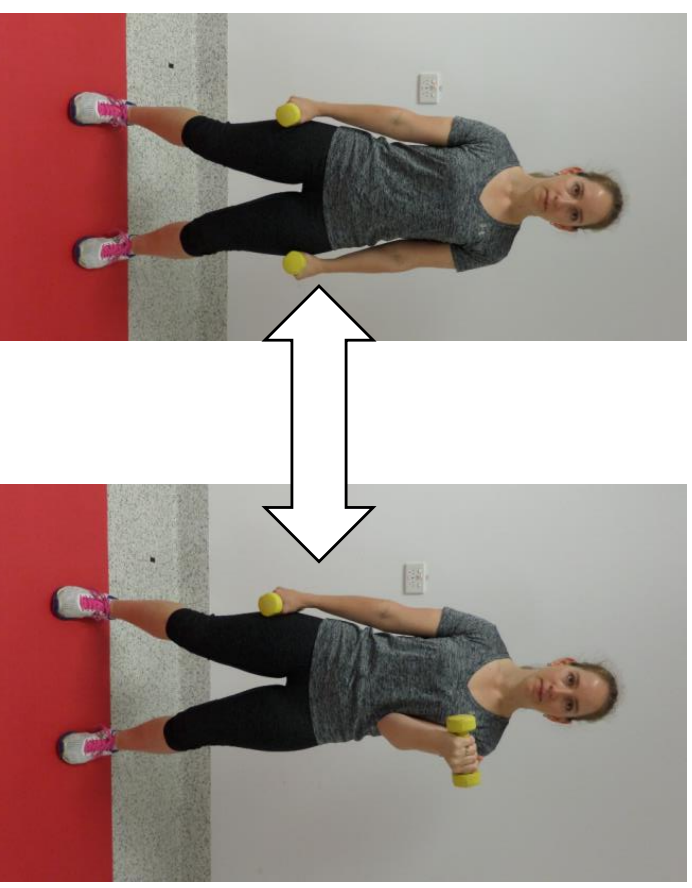

# Biceps (level 2) – both arms

## Start position:

Stand upright with feet apart

Hold dumbbells in each hand at side of body

Face palms forwards

## Movement:

Bend both elbows keeping hand weight straight

Slowly lower down again

Repeat

## Key points:

Keep elbows at side of body

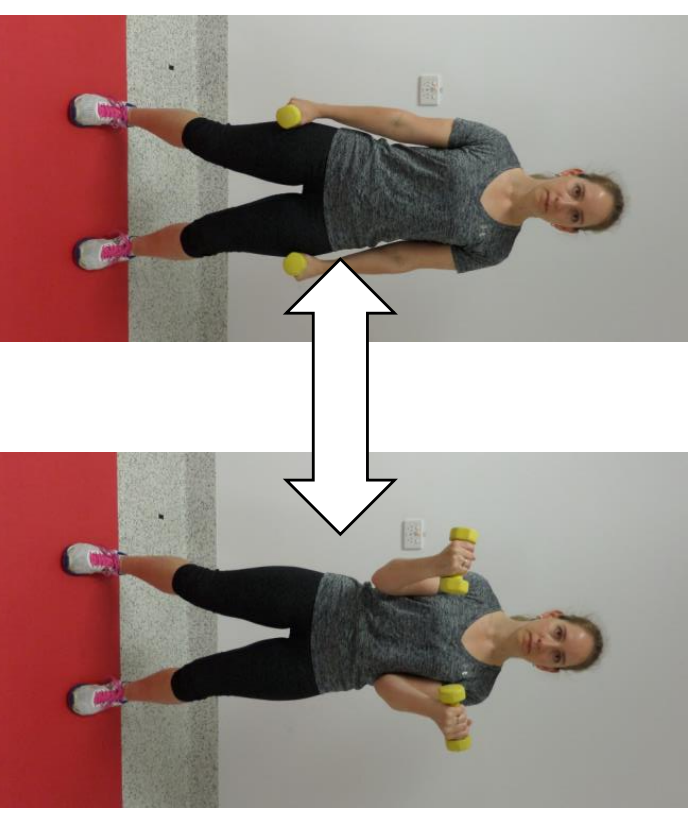



# Biceps (level 3) – with shoulder press

## Start position:

Stand upright with feet apart

Hold dumbbells in each hand at side of body

Face palms backwards

## Movement:

Bend both elbows keeping hand weights straight

Shoulder press weights to ceiling

Slowly lower down again to starting position

## Key points:

Keep elbows at side of body through first phase

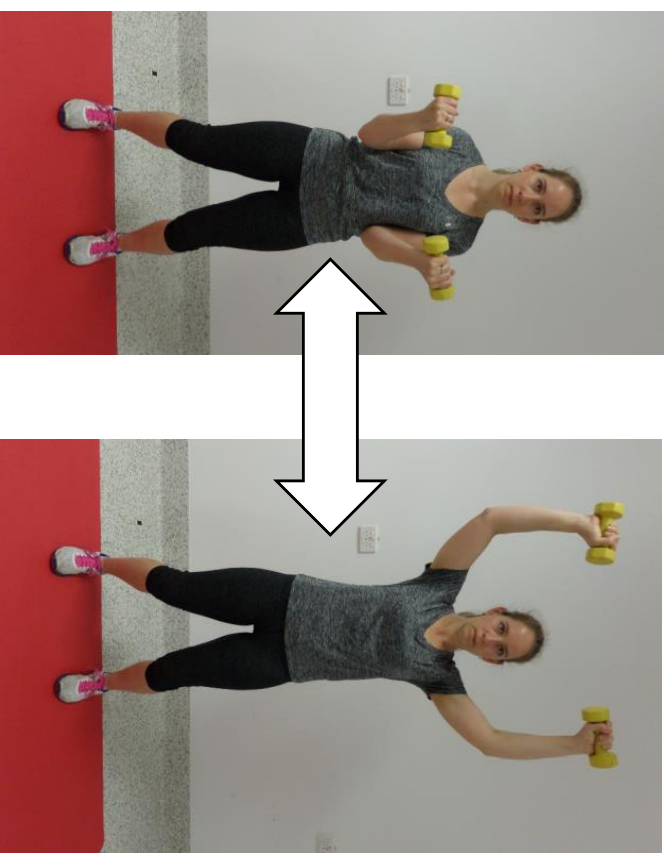

# Triceps (level 1) - curls

## Start position:

Bend over the back of a chair  
Hold a weight in your hand with your  
elbow bent

## Movement:

Straighten elbow by taking the  
weight down and behind  
Slowly bend elbow again  
Repeat

## Key points:

Keep shoulder still, only move  
hand

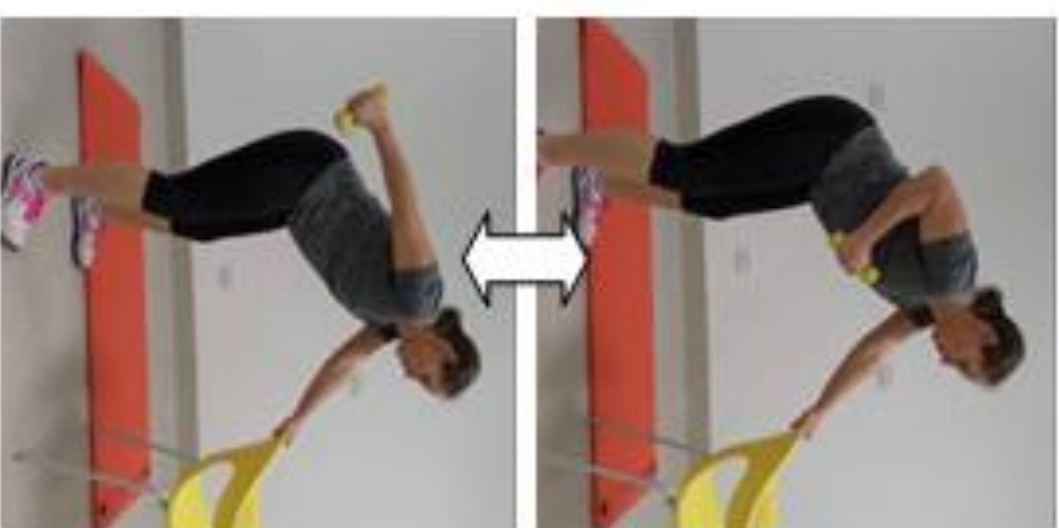

# Triceps (level 2) – overhead

## Start position:

Stand tall holding a dumbbell with both hands over your head

## Movement:

Bend your elbows and move the weight behind your head

Return to starting position

## Key points:

Keep shoulder still, only move hand

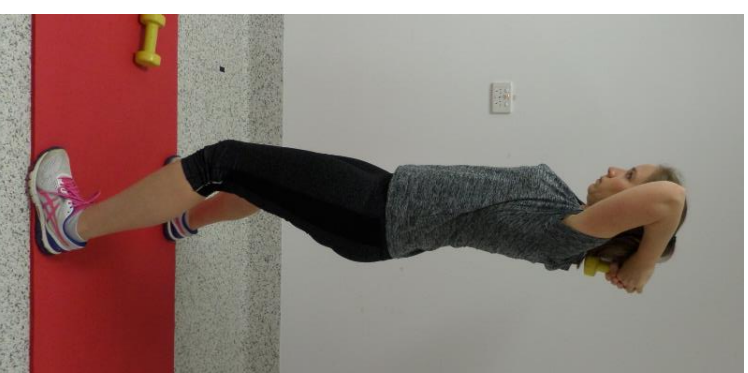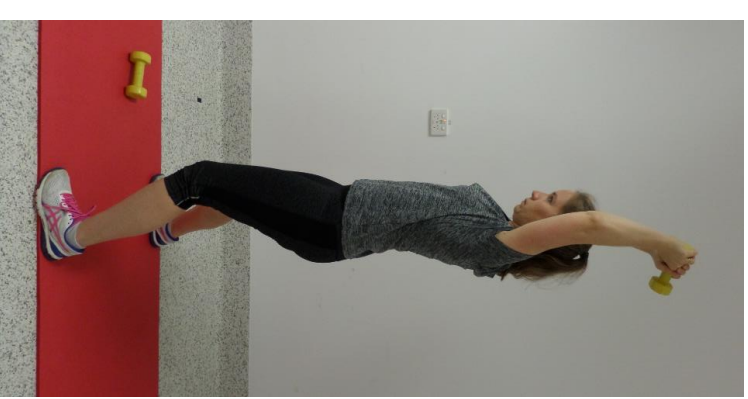

# Triceps (level 3) - dips

## Start position:

Support your body weight through your hands in front of chair

Feet shoulder width apart

## Movement:

Slowly lower your body down past the edge of the chair

by bending your elbows  
Slowly lift your body up by

straightening your arms

Repeat

## Key points:

Keep your elbows tucked in behind you

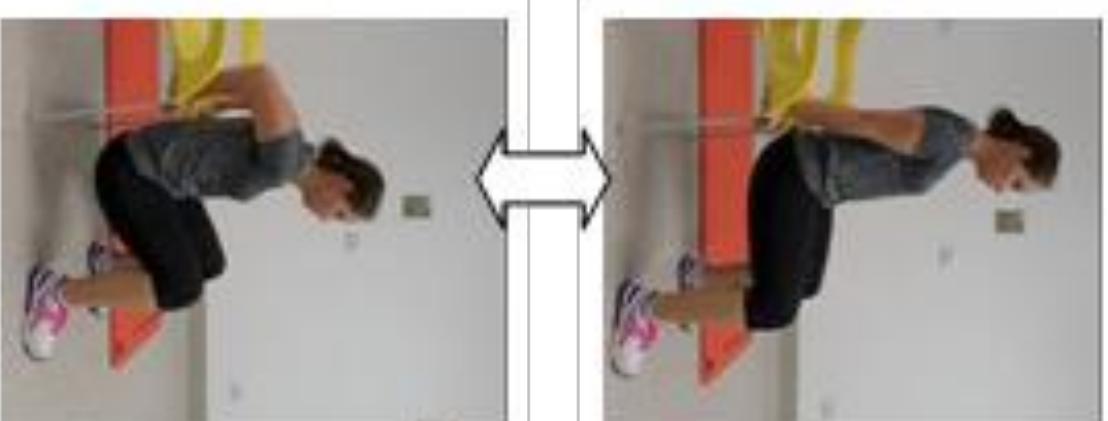

# Push-ups (level 1) - upright

## Start position:

Stand with feet slightly apart  
Rest hands on the wall

## Movement:

Lean into the wall as you bend  
your elbows  
Straighten arms slowly back to the  
start position

## Key points:

Draw in lower tummy  
Breathe

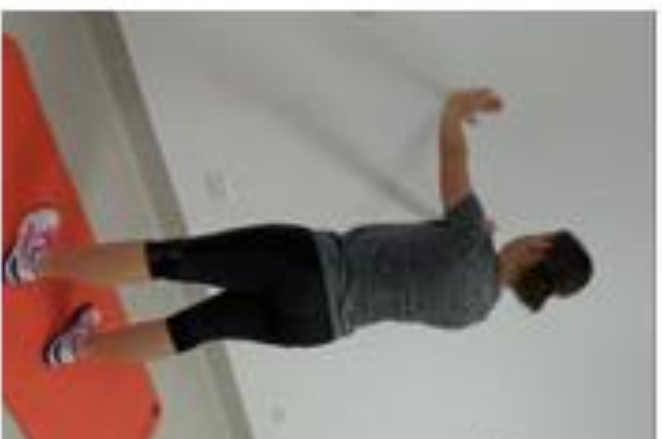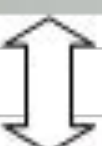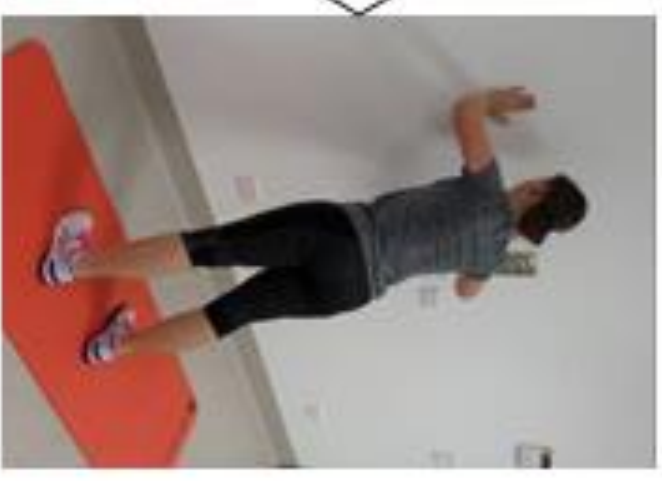

# Push-ups (level 2) – on knees

## Start position:

Position onto hands and knees

## Movement:

Lower towards the floor as you bend your elbows

Straighten arms slowly back to the start position

## Key points:

Draw in lower tummy

Breathe

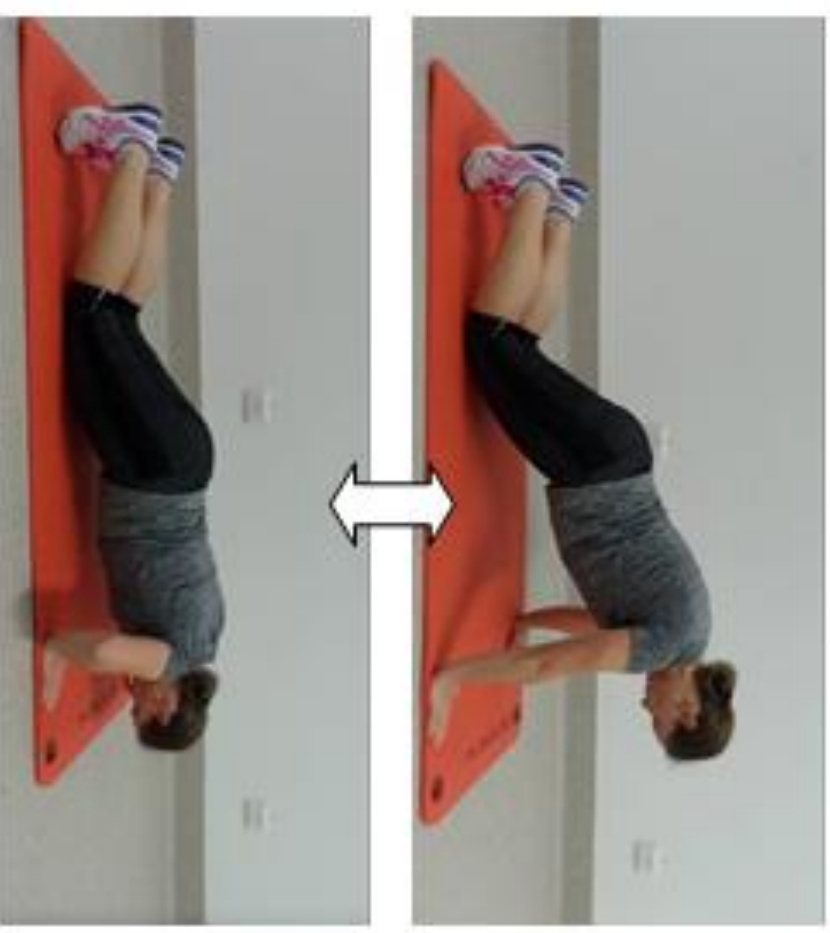



# Push-ups (level 3) – on toes

## Start position:

Position onto hands and toes

Maintain a body plank

## Movement:

Lower towards the floor as you bend your elbows

Straighten arms slowly back to the start position

## Key points:

Draw in lower tummy

Breathe

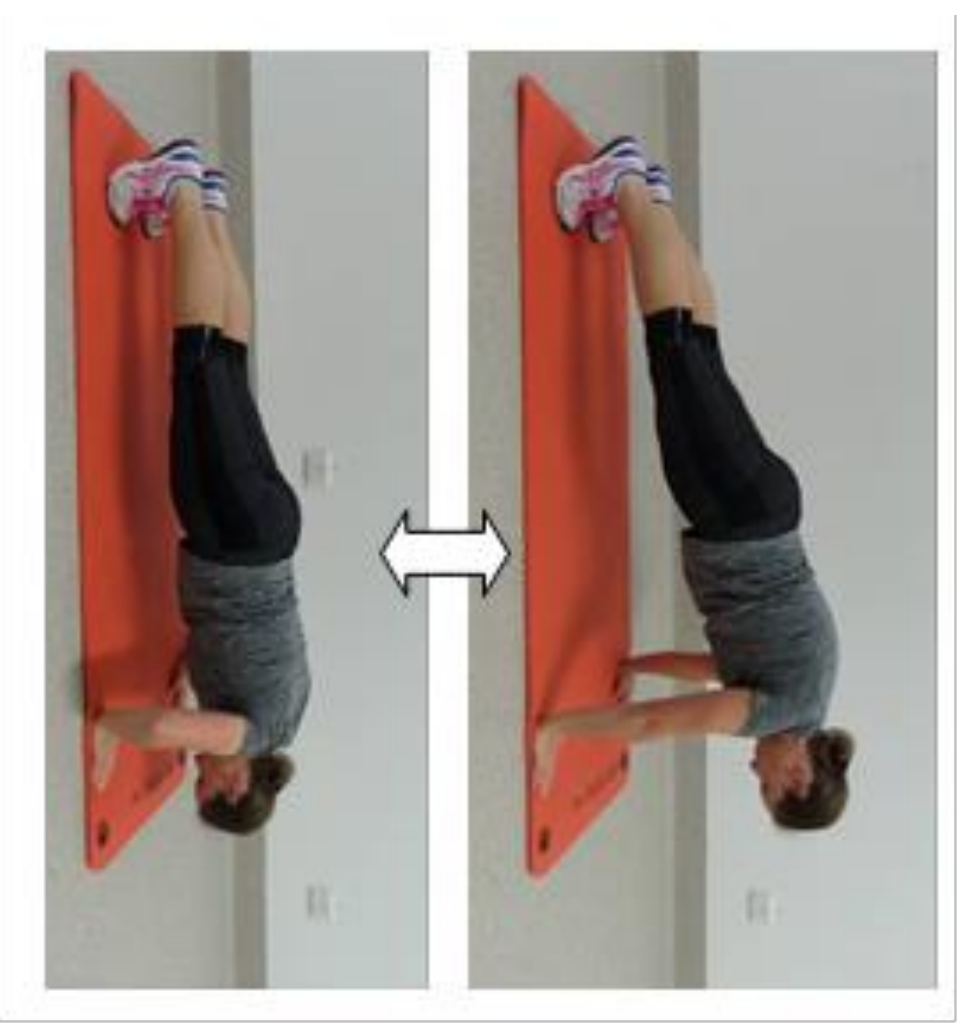

# Shoulder draw-back (level 1) – theraband row

## Start position:

Secure theraband

Hold theraband out in front with straight arms

## Movement:

Stretch the theraband by bringing your elbows to your sides

Pull your shoulder blades together

Return to the start position

## Key points:

Stand tall

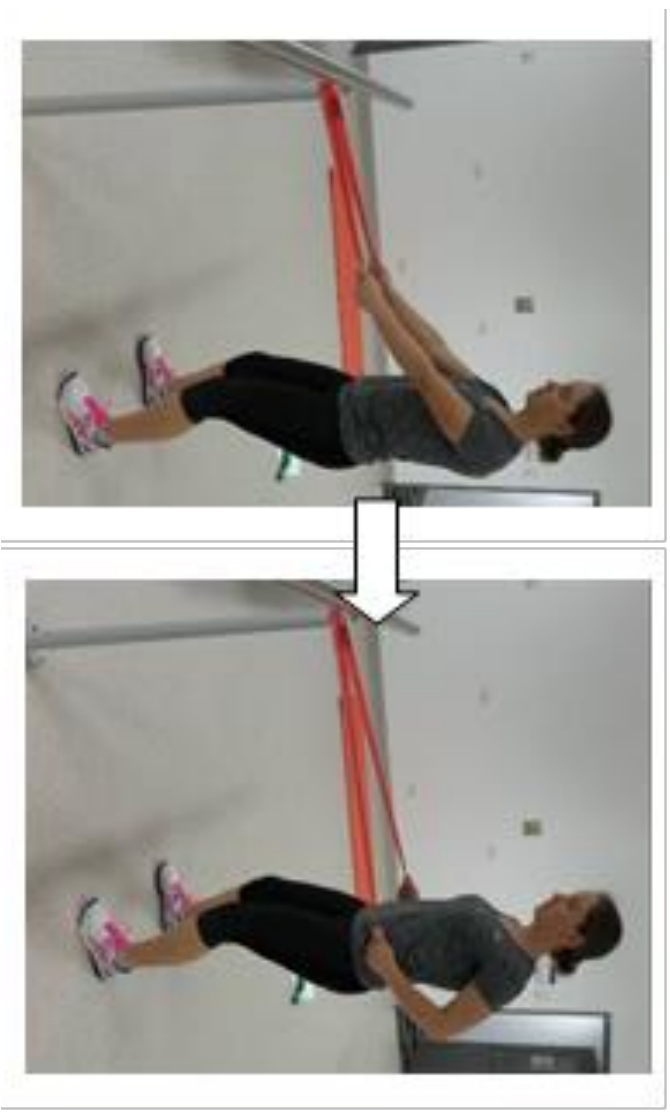



# Shoulder draw-back (level 2) – single bench row

## Stars position:

Bend over the back of a chair

Hold a dumbbell in your hand with your elbow straight

## Movement:

Bend elbow and lift dumbbell

upwards towards your shoulder

Slowly lower the weight down to start position

Repeat

## Key points:

Draw in lower tummy, squeeze shoulder blades together

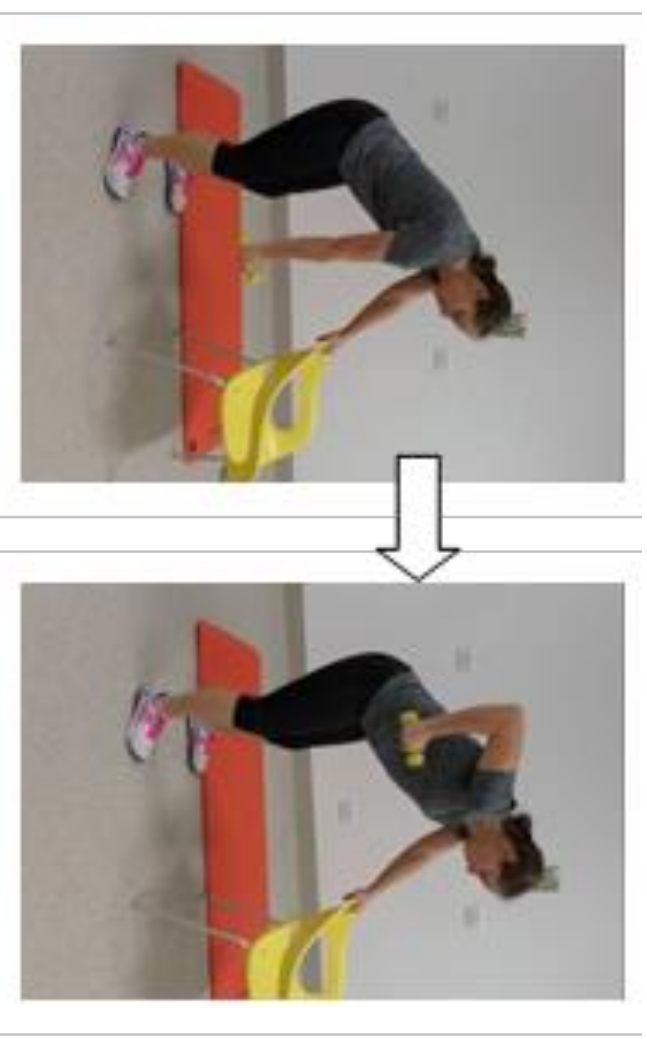

# Shoulder draw-back (level 3) – double bench row

## Start position:

Bend forwards slightly with a straight back

Hold dumbbells in hands

## Movement:

Bend elbows and lift dumbbell upwards towards your shoulders

Draw shoulder blades together

Slowly lower the weights down to the start position

Repeat

## Key points:

Draw in lower tummy

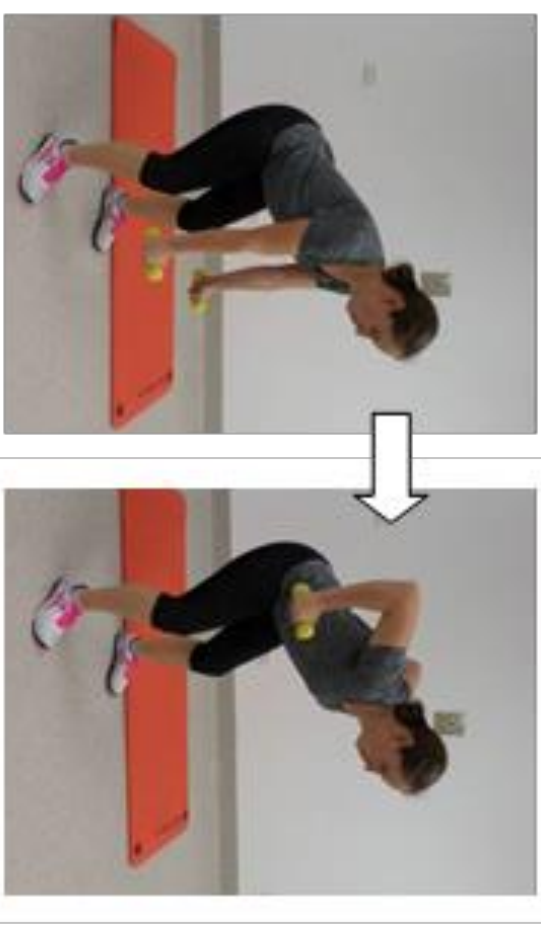

# Chest flies (level 1) – theraband bench press

## Start position:

Stand with feet apart

Secure theraband behind your back  
and shoulders

Position your bent arms with hands  
in front of your shoulders

## Movement:

Straighten both arms out in front

Return to the start position

Repeat

## Key points:

Draw in lower tummy and stand  
strong

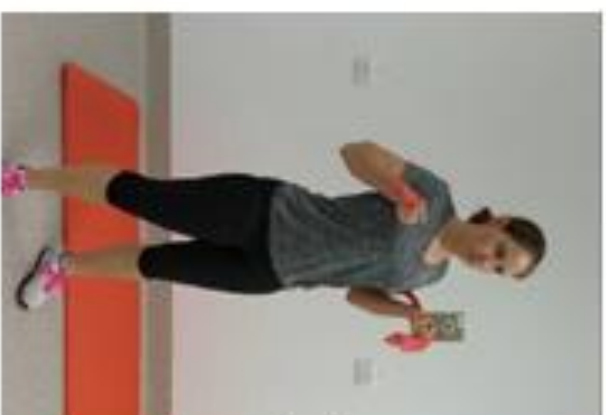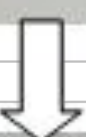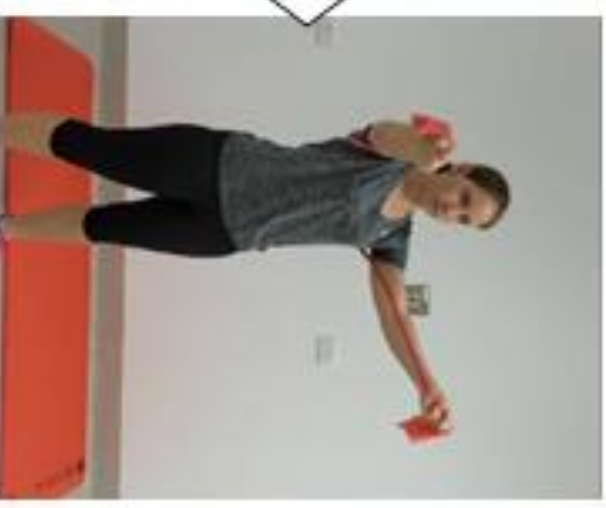

# Chest flies (level 2) – dumbbell

## Start position:

Lie on your back with legs bent up  
Hold weights with bent arms and  
hands in front of shoulders

## Movement:

Lift weights by straightening arms  
upwards

Slowly lower weights down to start  
position

Repeat

## Key points:

Brace body through activating  
tummy

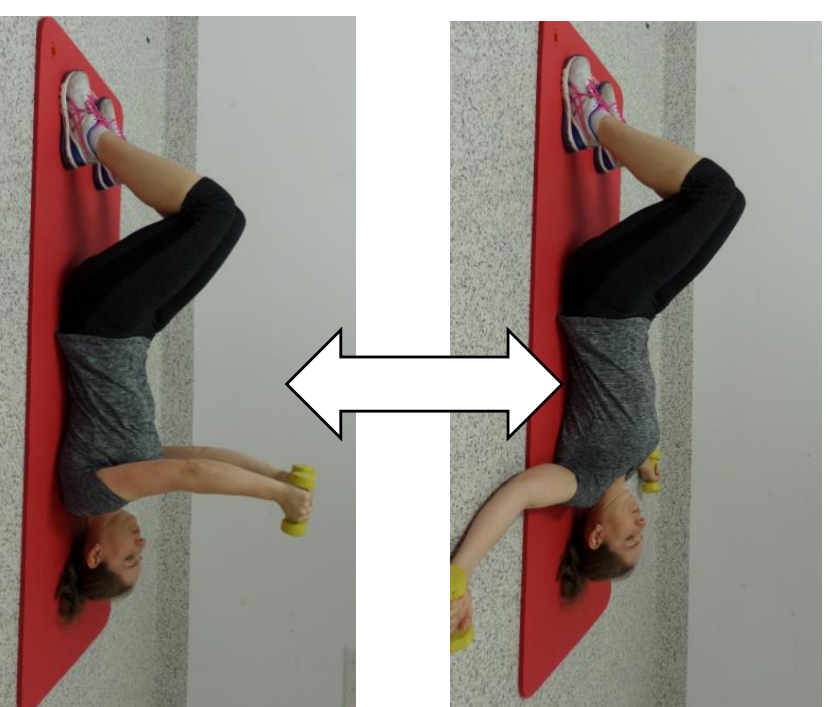

# Chest flies (level 3) – reverse flies

## Start position:

Bend forwards slightly with a straight back

Hold dumbbells in hands

## Movement:

Keep arms straight and lift

weights upwards and outwards

Slowly lower weights down to start position

## Key points:

Draw in lower tummy

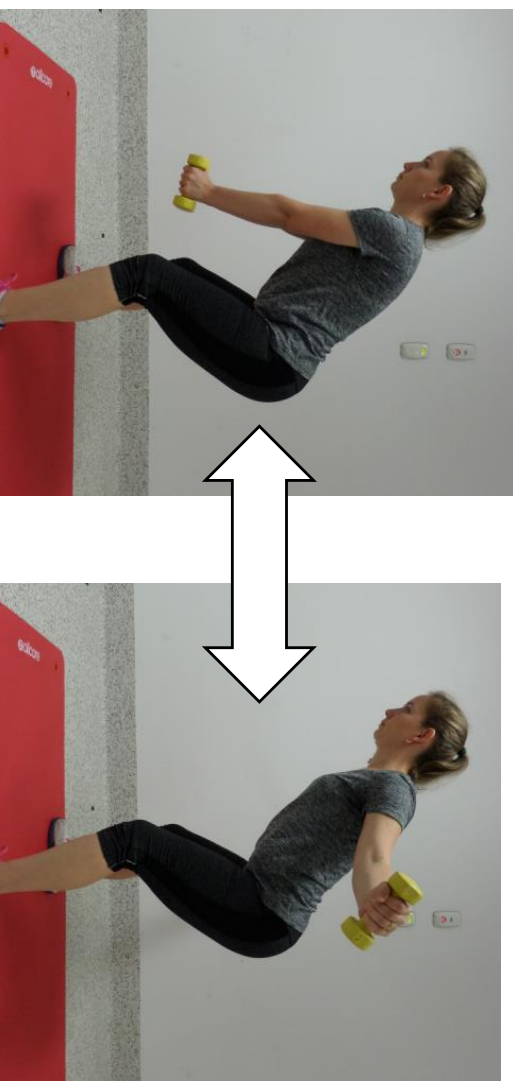

# Bridging (level 1) – double leg

## Start position:

Lie on your back with legs bent up

Feet close to your pelvis

Hands on floor by your side

## Movement:

Lift bottom up off the floor

Hold for 3-5 sec

Return bottom to the floor

Repeat

## Key points:

Draw in lower tummy, squeeze bottom muscles

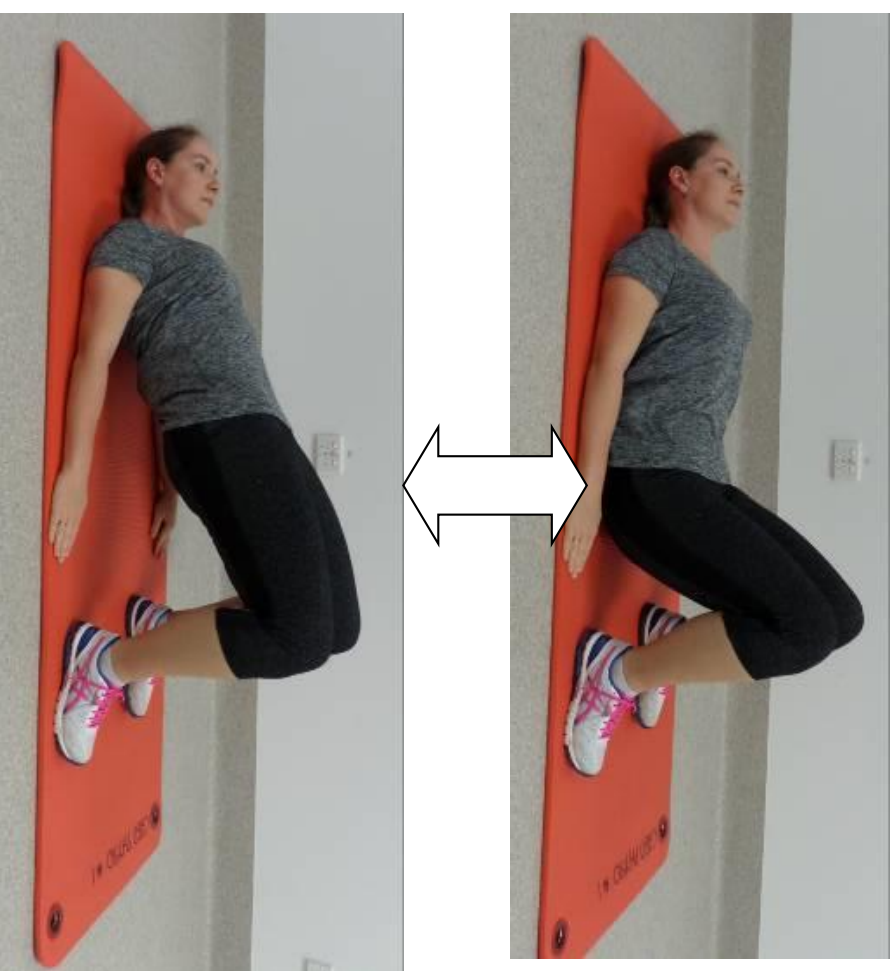



## Bridging (level 2) - march

### Start position:

Lie on your back with legs bent  
Feet close to your pelvis  
Hands on floor by your side

### Movement:

Lift bottom up off the floor  
March alternate feet slowly  
Return bottom to the floor  
Repeat

### Key points:

Draw in lower tummy,  
squeeze bottom muscles

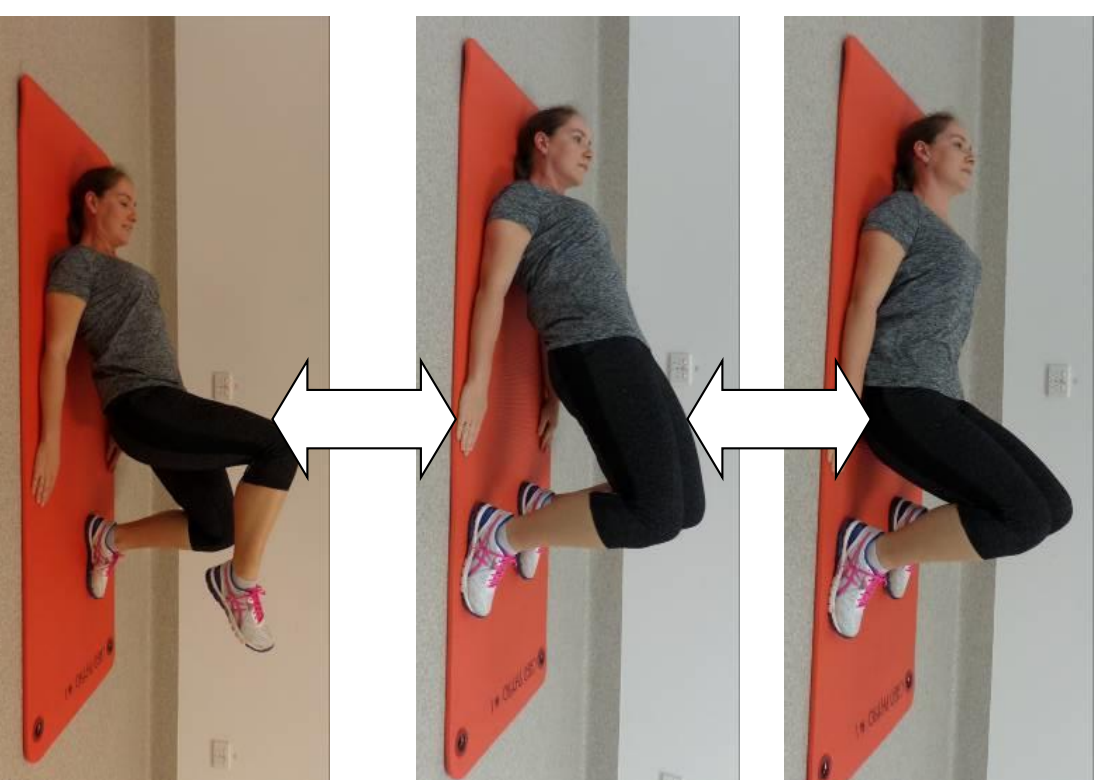

## Bridging (level 3) - on a ball

### Start position:

Lie on your back with your feet on ball

Hands on floor by your side

### Movement:

Push through the ball to lift bottom up off the floor

Hold for 3-5 sec

Return pelvis to the floor

Repeat

### Key points:

Draw in lower tummy, squeeze bottom muscles

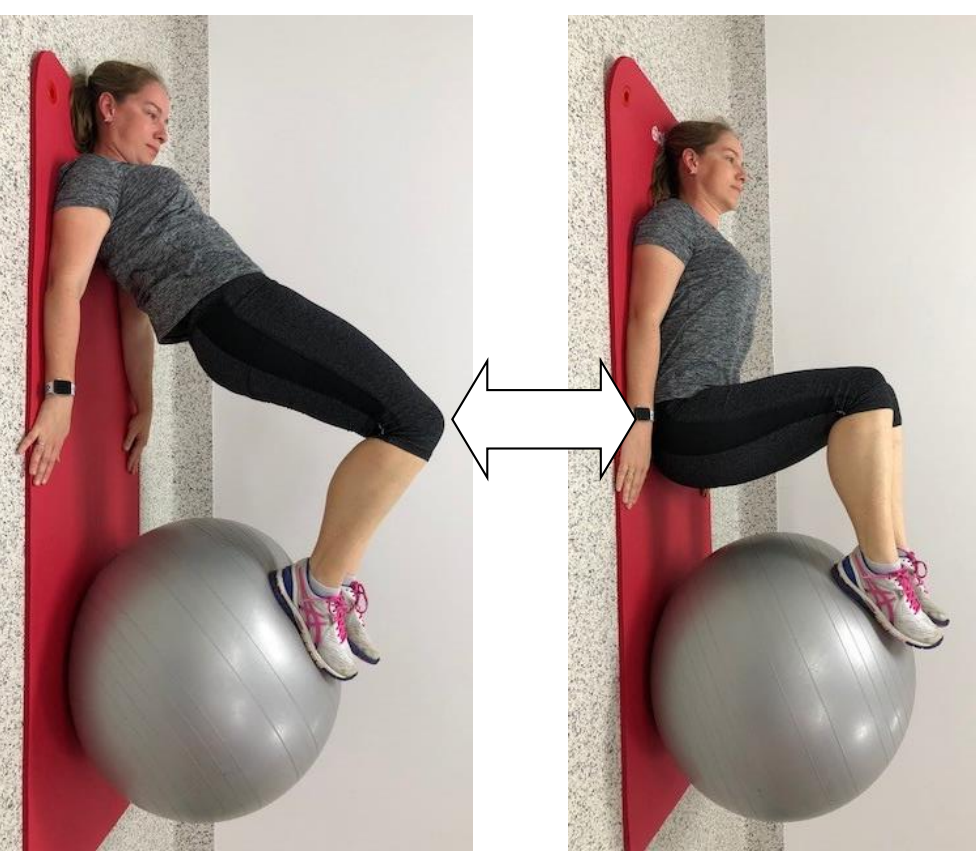



# Step Ups (level 1) – low step

## Start position:

Stand upright with step in front of you

## Movement:

Step one foot up on step

Step opposite foot onto step

Step both feet back down to floor to start position

Repeat

## Key points:

Increase speed as able

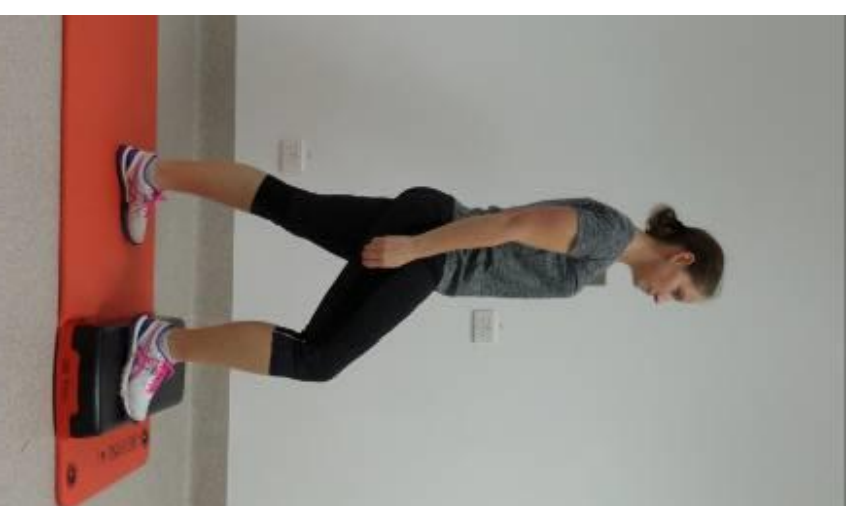

# Step Ups (level 2) – high step

## Start position:

Stand upright with step in front of you

## Movement:

Step one foot up on step

Step opposite foot onto step

Step both feet back down to floor to start position

Repeat

## Key points:

Increase speed as able

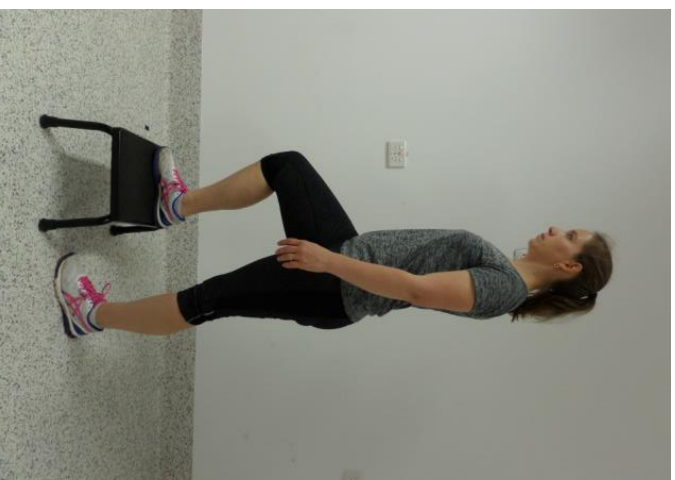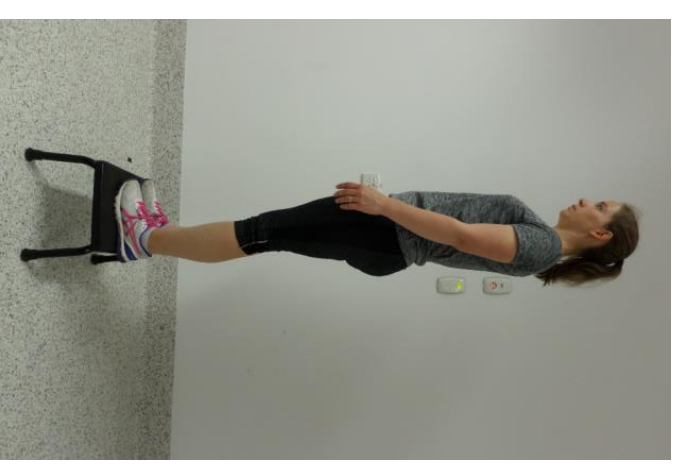

# Step Ups (level 3) – high step with dumbbell

## Start position:

Stand upright with step in front of you and dumbbell in each hand

## Movement:

Step one foot up on step

Touch other foot onto step

Step back and down to floor to start position

Repeat

## Key points:

Increase speed as able

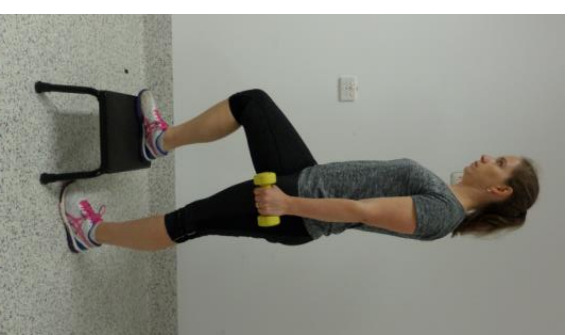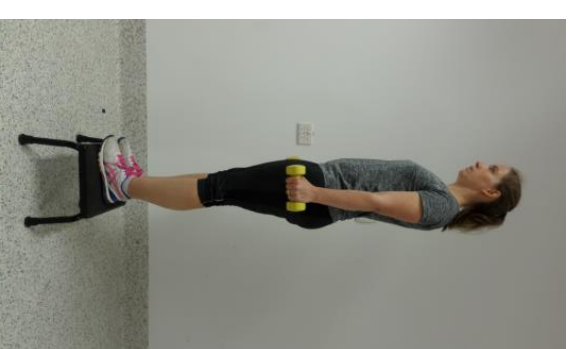

# Donkey Kick (level 1) – low

## Start position:

4-point kneeling on elbows and knees

## Movement:

Lift foot up until the knee is in line with your hip

Slowly lower the leg down

Repeat

## Key points:

Keep your back still, squeeze bottom muscles

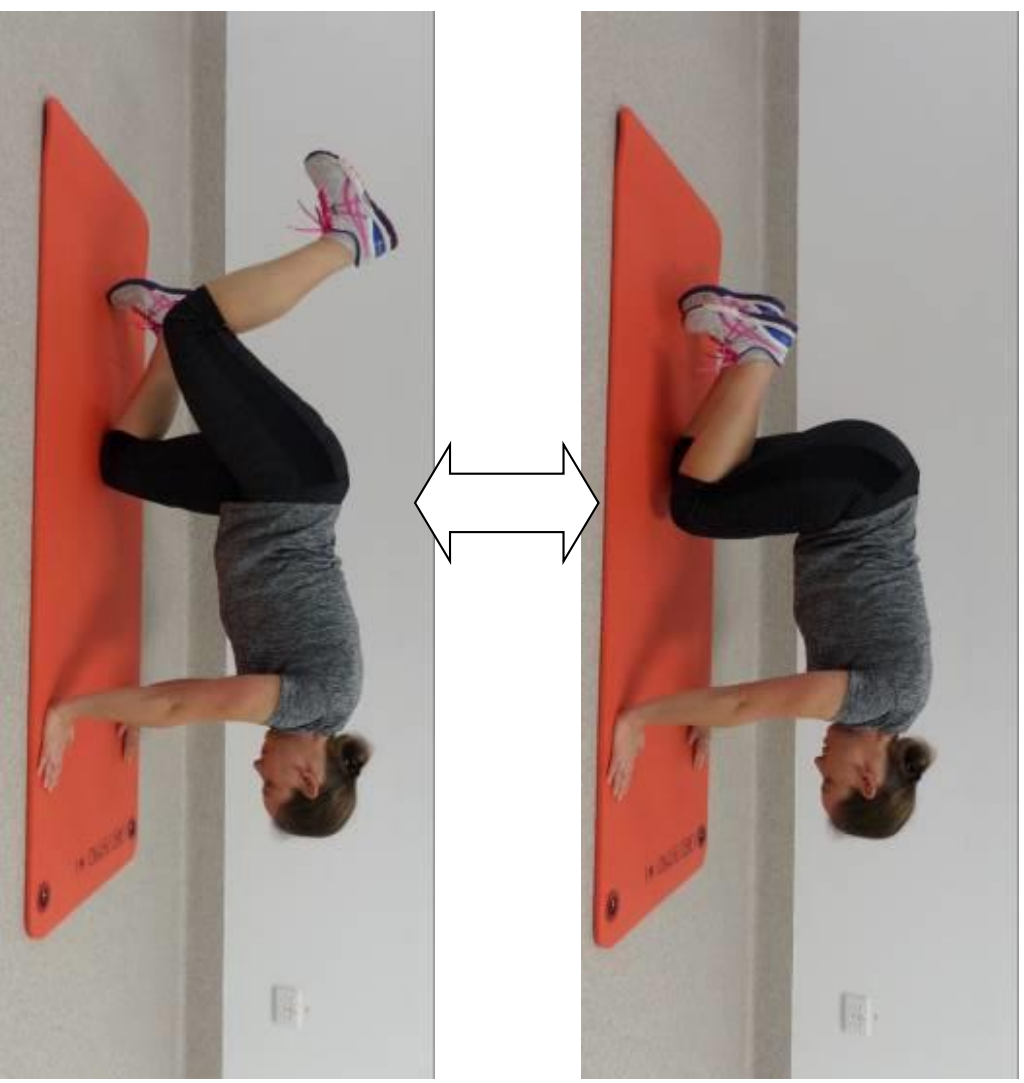

# Donkey Kick (level 2) – high

## Start position:

4-point kneeling on elbows and knees

Start with one knee off the floor in line with the hip

## Movement:

Lift foot up until the knee is above the line of the hip

Slowly lower the leg down

Repeat

## Key points:

Keep your back still, squeeze bottom muscles

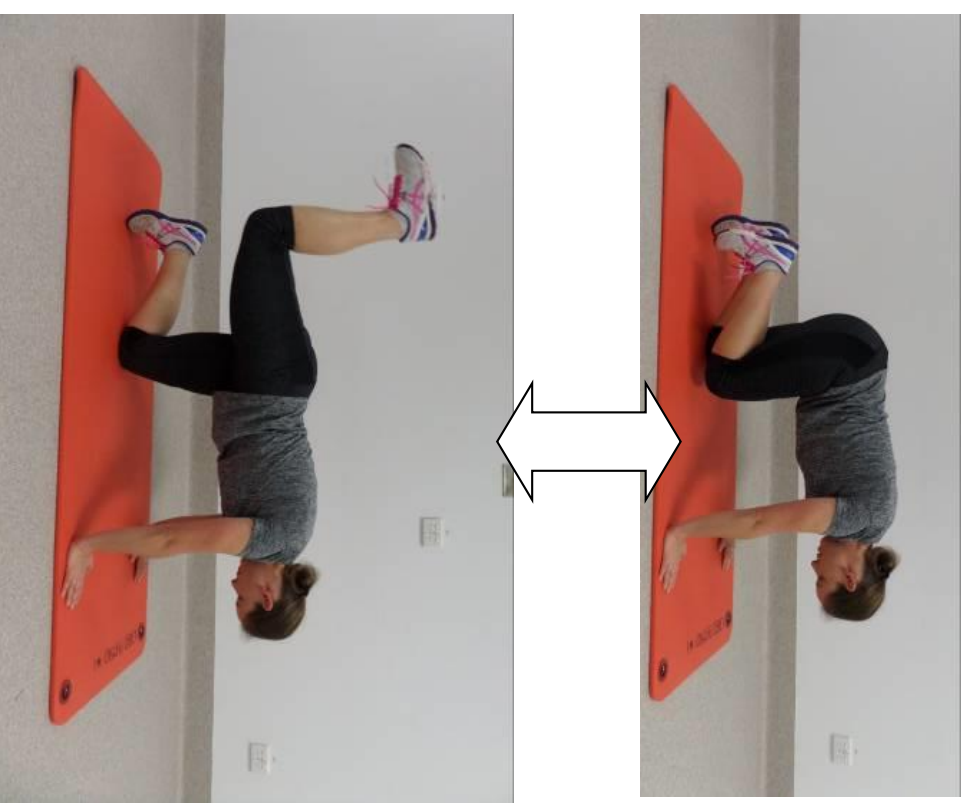

# Donkey Kick (level 3) – with plank

## Start position:

On elbows and toes with body in a straight line

## Movement:

Bend knee and lift foot up until the knee is above the line of the hip

Slowly lower the leg down

Repeat

## Key points:

Keep your back still, squeeze bottom muscles

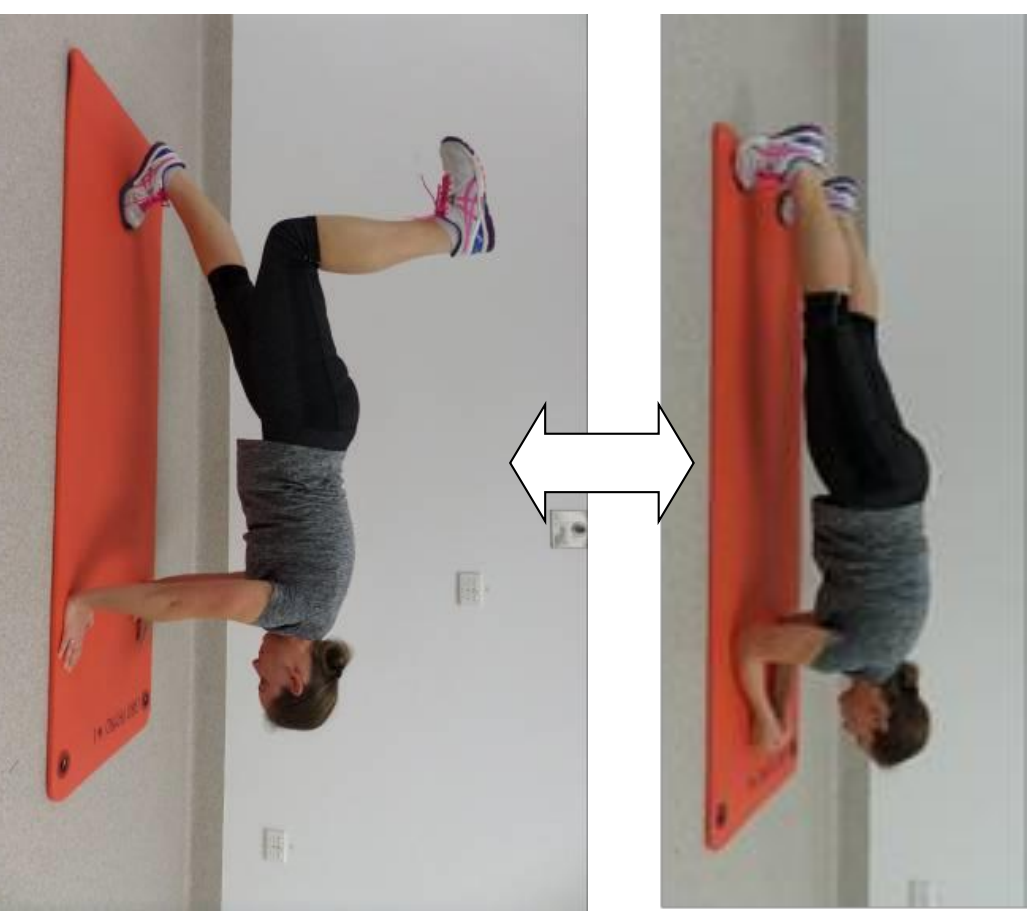



# Squats (level 1) – sit-stand

## Start position:

Stand with a chair or bench behind you

Face feet forwards and shoulder width apart

## Movement:

Sit to stand and repeat

## Key points:

Even weight through your legs

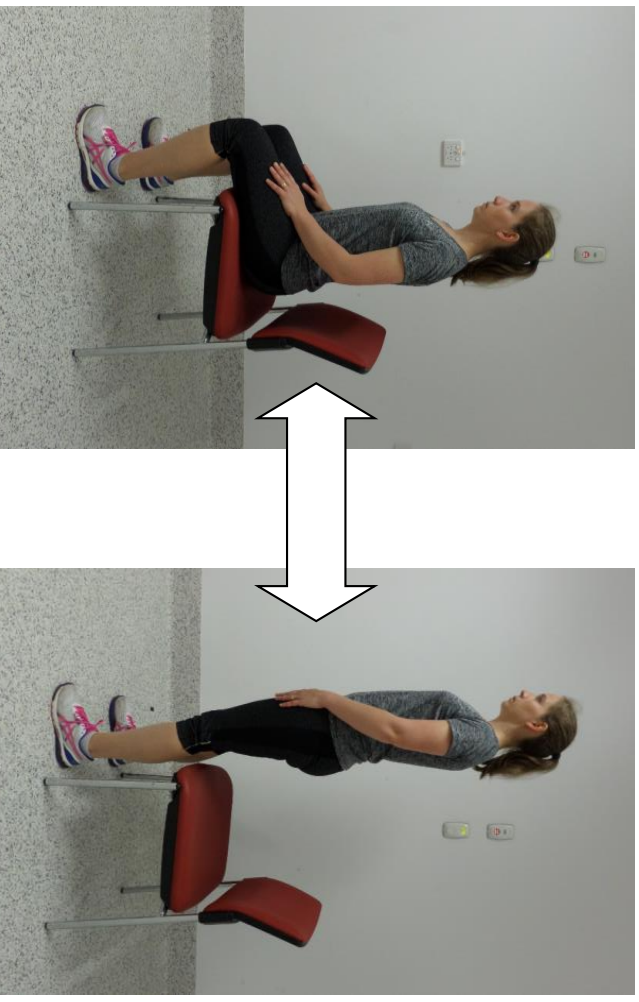

# Squats (level 2) – air squat

## Start position:

Stand upright with feet shoulder width apart and facing forwards

## Movement:

Bend you knees

Move your bottom backward like you are going to sit on a chair

Hold for 3 sec

Stand back into start position

## Key points:

Don't let you knees go past your toes

Should not be painful on the knees

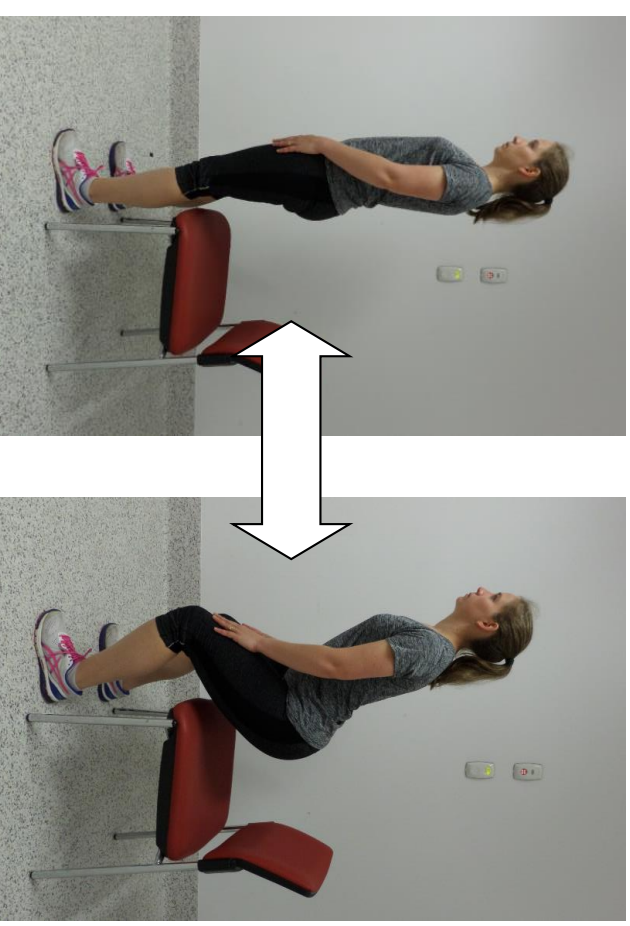



# Squats (level 3) – jump squat

## Start position:

Bend your knees and stick your bottom out into a squat position

## Movement:

Push through your legs into a jump and return to your squat position

## Key points:

Switch on your pelvic floor muscles as you land

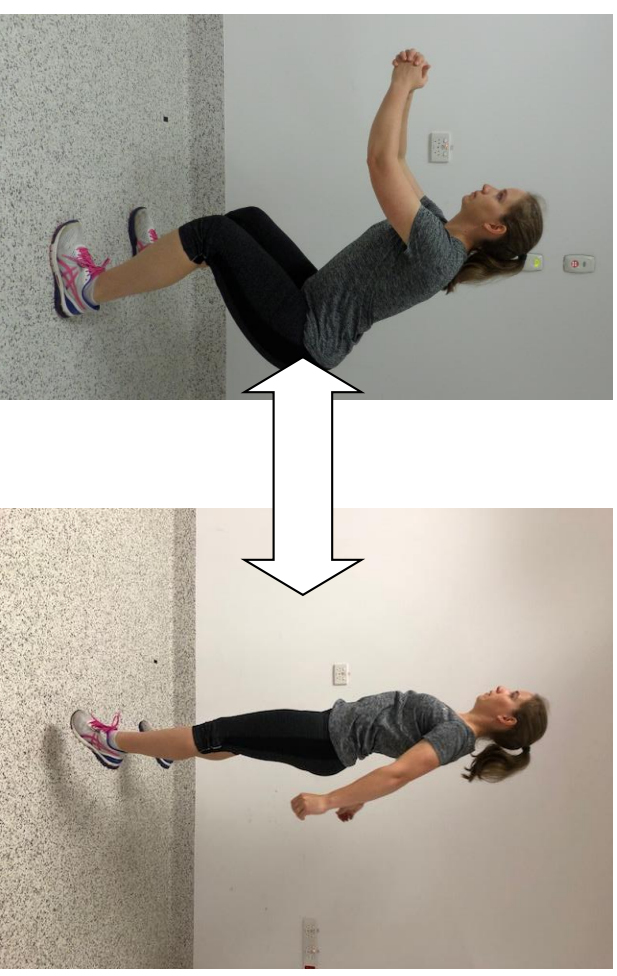

# Calf Raises (level 1) – double calf raises

## Start position:

Stand with feet shoulder width apart

## Movement:

Lift body up to stand on balls of feet

Slowly lower down

Repeat

## Key points:

Keep knees straight

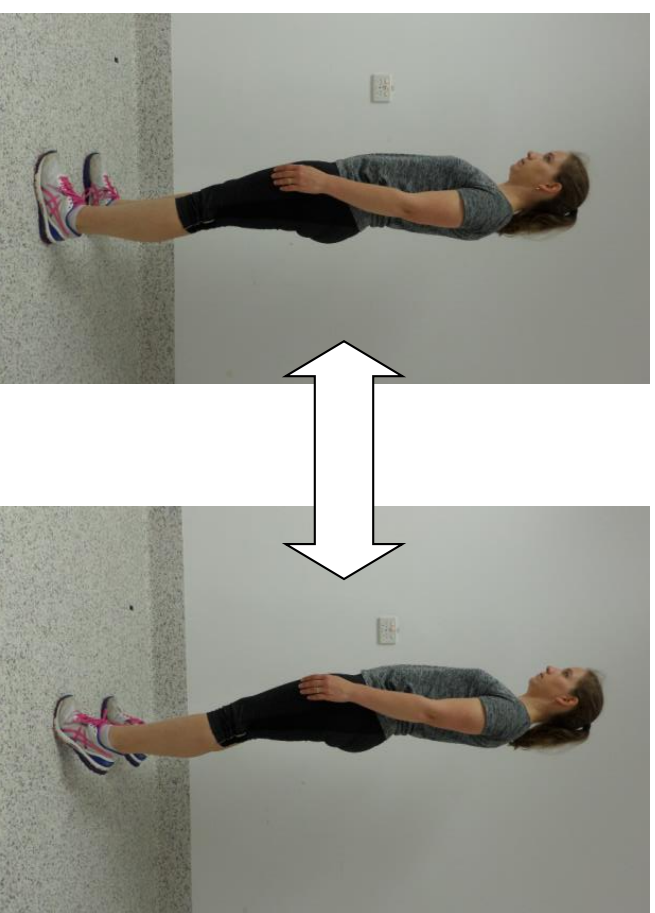

# Calf Raises (level 2)

## – single calf Raise on ground

### Start position:

Stand on one foot

### Movement:

Lift body up to stand on ball of one foot

Slowly lower down

Repeat

Repeat on other side

### Key points:

Keep knee straight

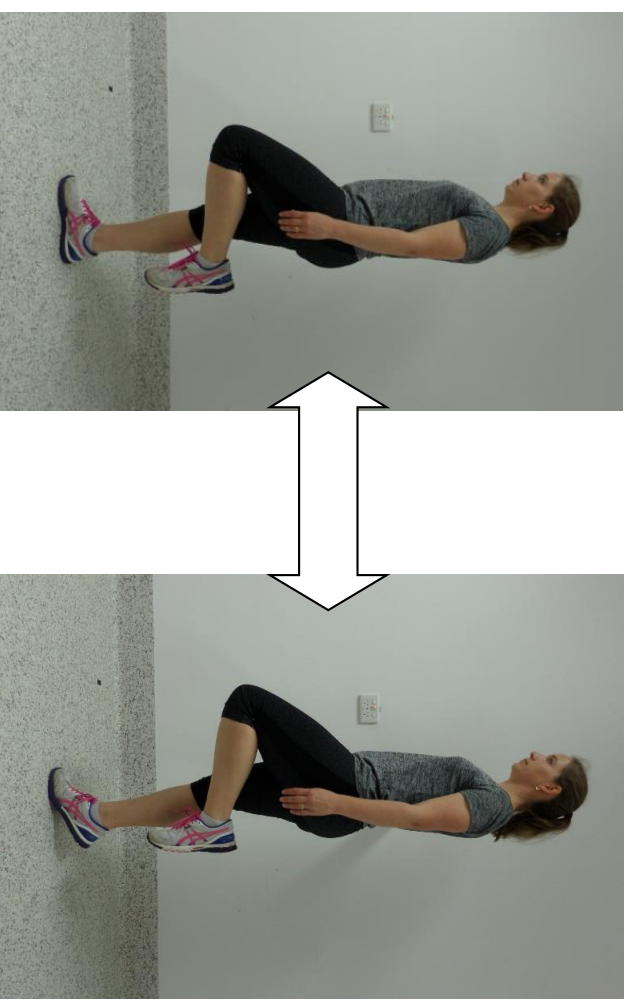

# Calf Raises (level 3)

## – calf raises on step

### Start position:

Stand with one or both feet on the step  
Place balls on feet on the step and the  
heels off the edge of the step

### Movement:

Lift body up to stand on balls of feet  
Slowly lower down  
Repeat

### Key points:

Keep knees straight  
Try single leg to increase difficulty

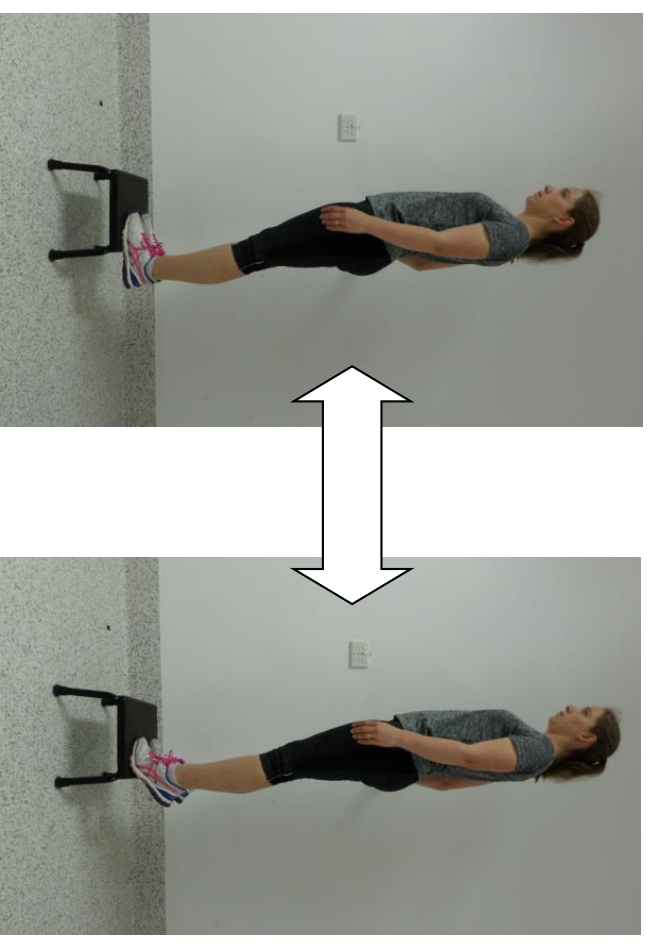

# Lunges (level 1) - bounce

## Start position:

Stand with one leg out in front  
Face feet forwards

## Movement:

Bend both knees to move back knee  
towards the floor

Hold for 2-3sec

Return to start position

Repeat with same leg

## Key points:

Keep front knee behind level of  
toes

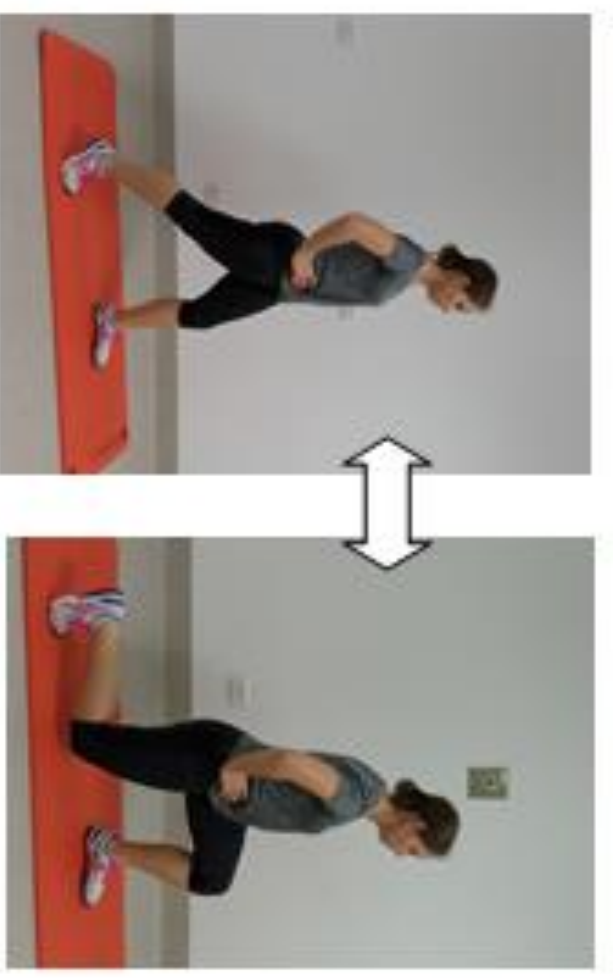

# Lunges (level 2) – leg swap

## Start position:

Stand with one leg out in front  
Face feet forwards

## Movement:

Bend both knees to move back  
knee towards the floor  
Hold for 2-3sec  
Straighten up to start position  
Step to swap legs  
Perform on other side

## Key points:

Keep front knee behind level of  
toes

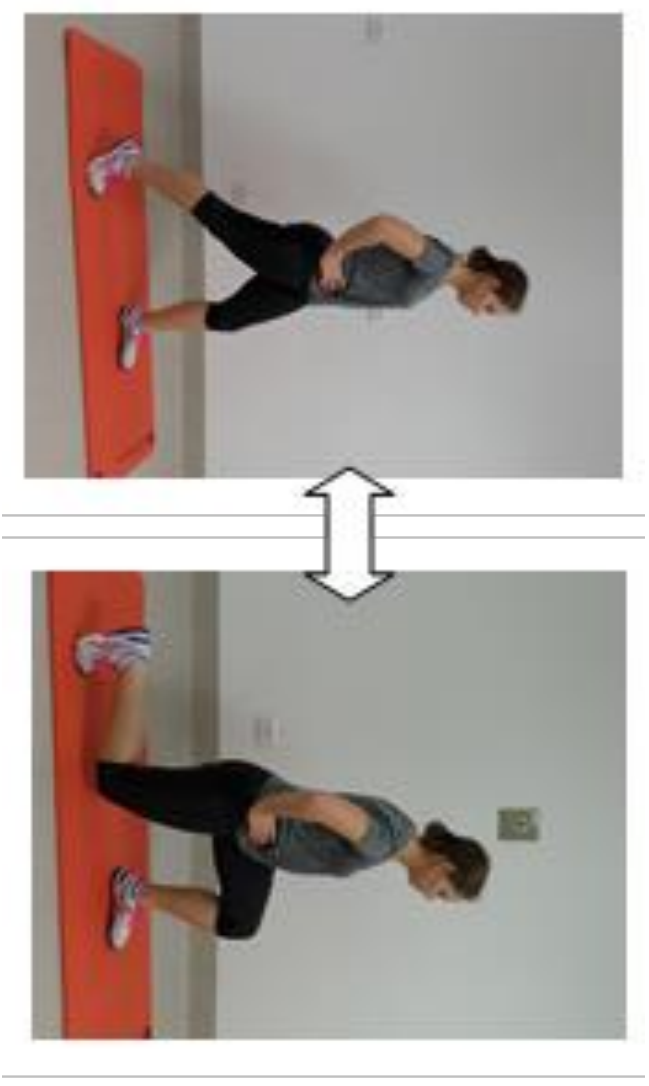



# Lunge (level 3) –jumping leg swap

## Start position:

Stand with one leg out in front  
Face feet forwards

## Movement:

Bend both knees to move back knee  
towards the floor  
Hold for 2-3sec  
Jump up and swap legs in the air  
Perform on other side

## Key points:

Keep front knee behind level of toes

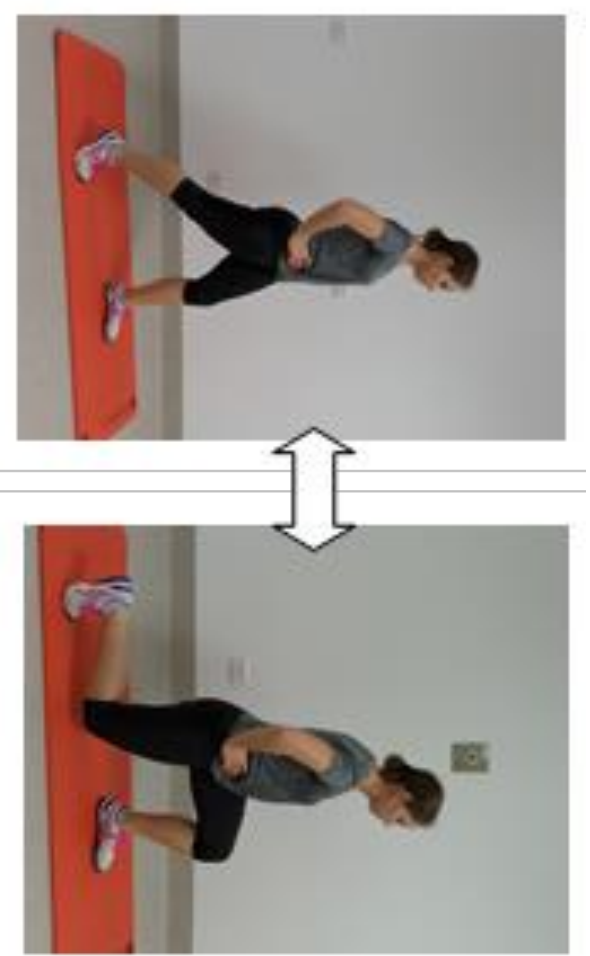

# Deadlift (level 1) – light dumbbell

## Start position:

Stand tall with a dumbbell in each hand resting forward onto the front of your legs

## Movement:

Hinge at your hips to move the dumbbells past your knees

Keep your legs straight

Return to standing

## Key points:

You should feel this working the back of your legs (hamstrings)

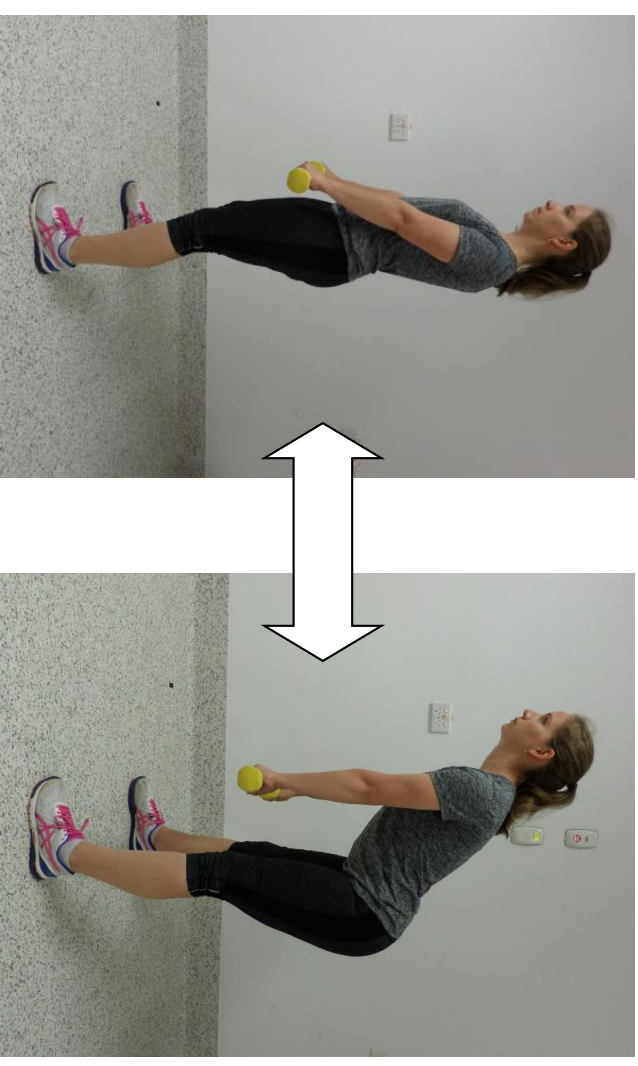



# Deadlift (level 2) – heavier dumbbell

## Start position:

Stand tall with a weight in each hand and resting forward onto the front of your legs

## Movement:

Hinge at your hips to move the weights past your knees

Keep your legs straight

Return to standing

## Key points:

You should feel this working the back of your legs (hamstrings)

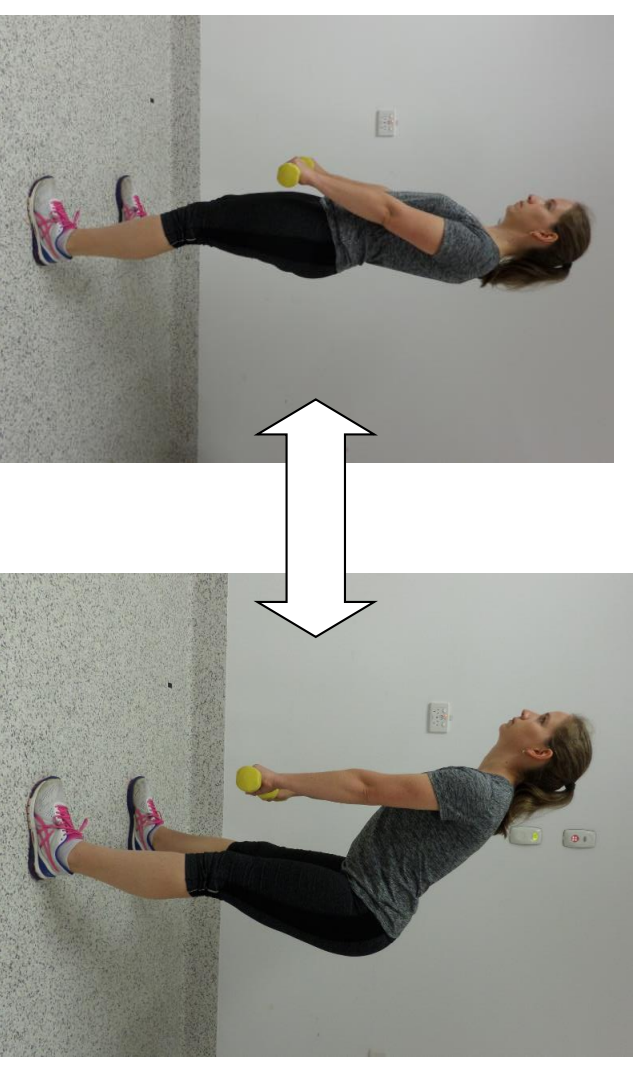

# Deadlift (level 3) – dumbbell swing

## Start position:

Stand holding a weight with both hands between your legs

## Movement:

Hinge at your hips to move the dumbbell backwards between your legs and then upwards towards the roof

Keep your legs straight

## Key points:

You should feel this working the back of your legs (hamstrings)

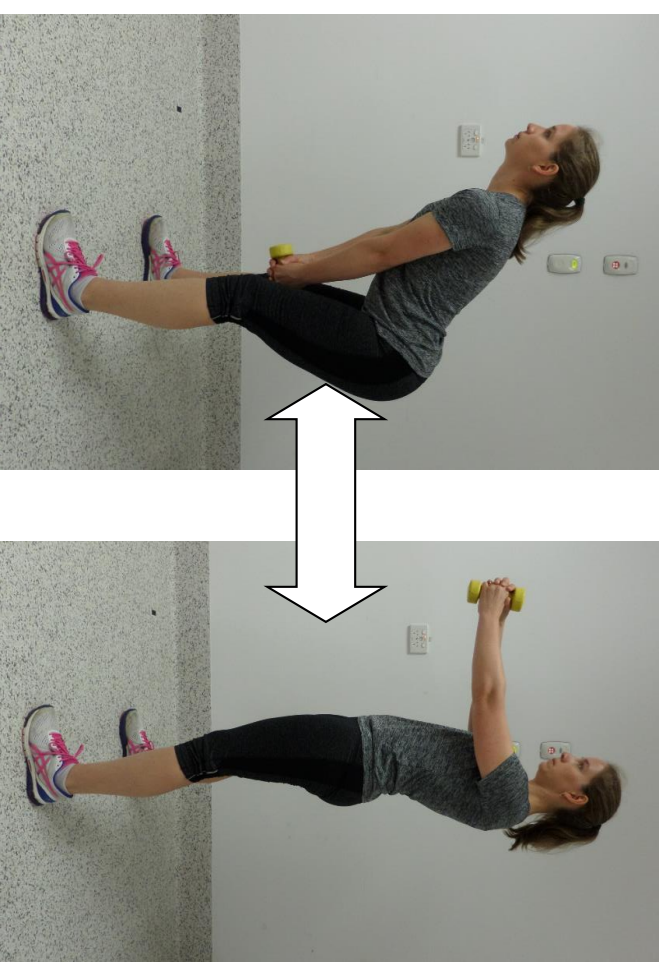

# Jogging (level 1) – marching on the spot

## Start position:

In standing

## Movement:

Alternatively bring each knee towards the chest

## Key points:

Switch on pelvic floor muscles with each bounce

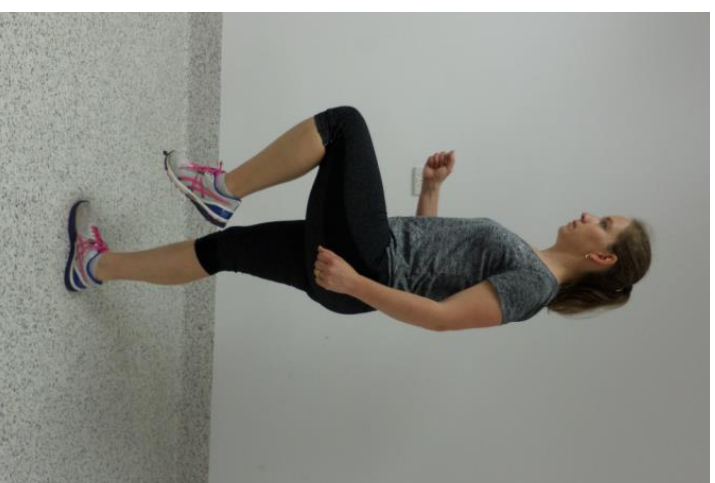

# Jogging (level 2) – light jogging on the spot

Start position:

Standing

Movement:

Lightly jog on the spot

Key points:

Switch on pelvic floor muscles with each step

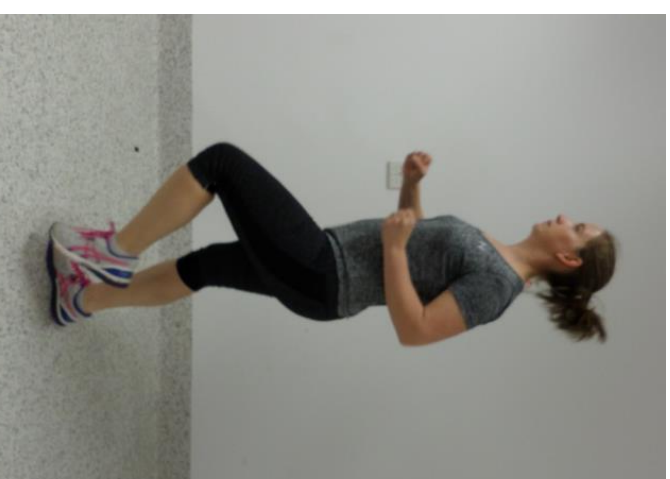

# Jogging (level 3)

## – fast jogging with high knees

### Start position:

In standing

### Movement:

Jog fast on the spot with high knees

### Key points:

Switch on pelvic floor muscles with each bounce

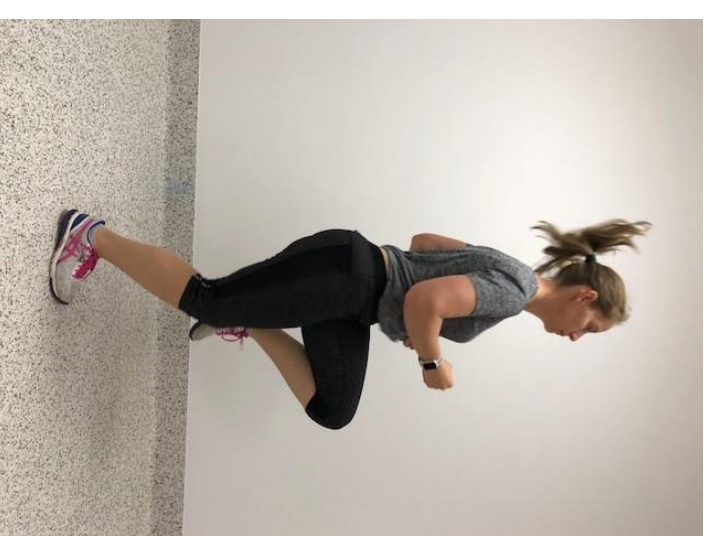

# Side Ski Jumps (Level 1) – step outs

## Start position:

Stand with feet together

## Movement:

Step one foot outwards, and bring opposite foot to it. Repeat in other direction.

## Key points:

Switch on pelvic floor muscles with each step

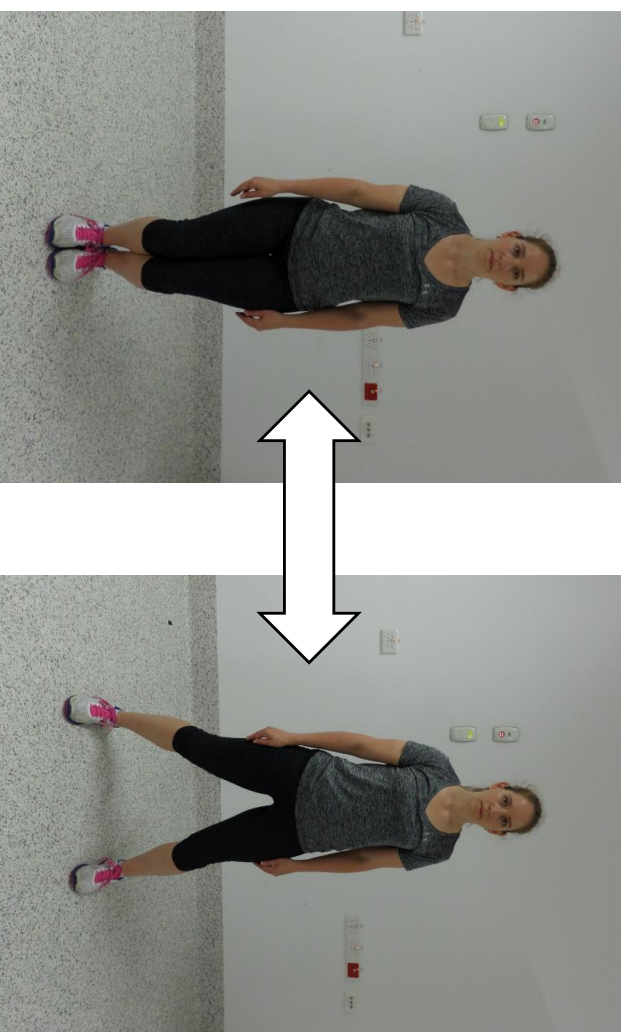



# Side Ski Jumps (Level 2)

## – hop with toe touch

### Start position:

Stand with feet apart

### Movement:

Hop one foot outwards, balance on this foot, and step opposite foot behind it

### Key points:

Switch on pelvic floor muscles with each hop

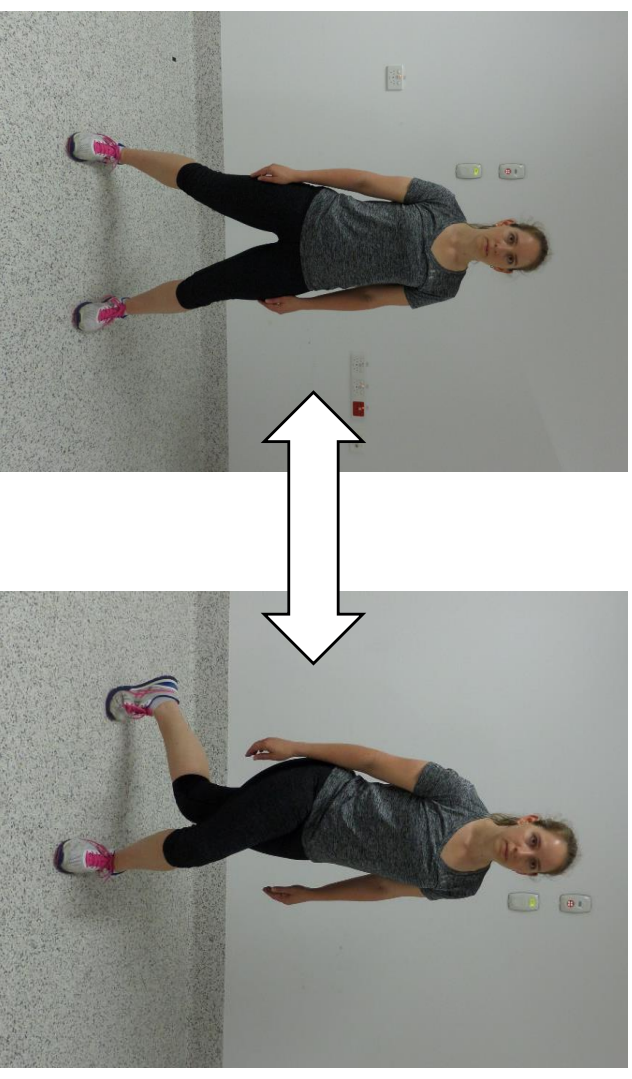

# Side Ski Jumps (Level 3)

## – hop without toe touch

### Start position:

Stand with feet together

### Movement:

Hop one foot outwards, balance on this foot, and move opposite foot behind it, keeping your foot off the floor

### Key points:

Switch on pelvic floor muscles with each bounce

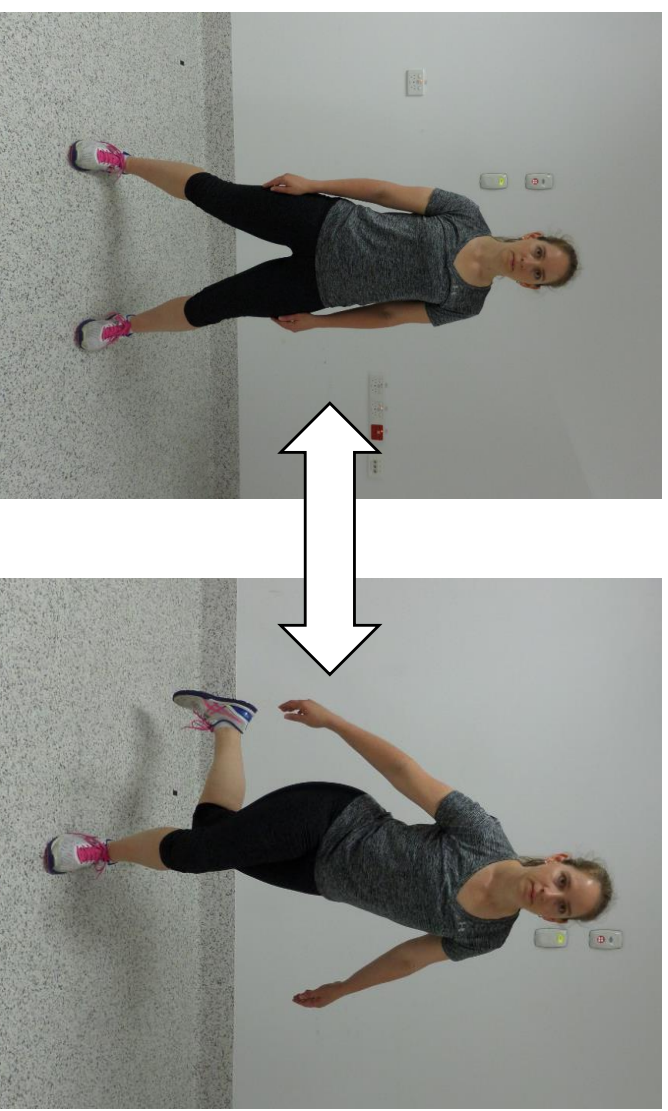



# Trampoline (Level 1) – walking on toes

## Start position:

Stand on the trampoline

## Movement:

Bounce forward onto alternate toes, keeping feet grounded on the trampoline at all times

## Key points:

Switch on pelvic floor muscles with each bounce, keep knees soft

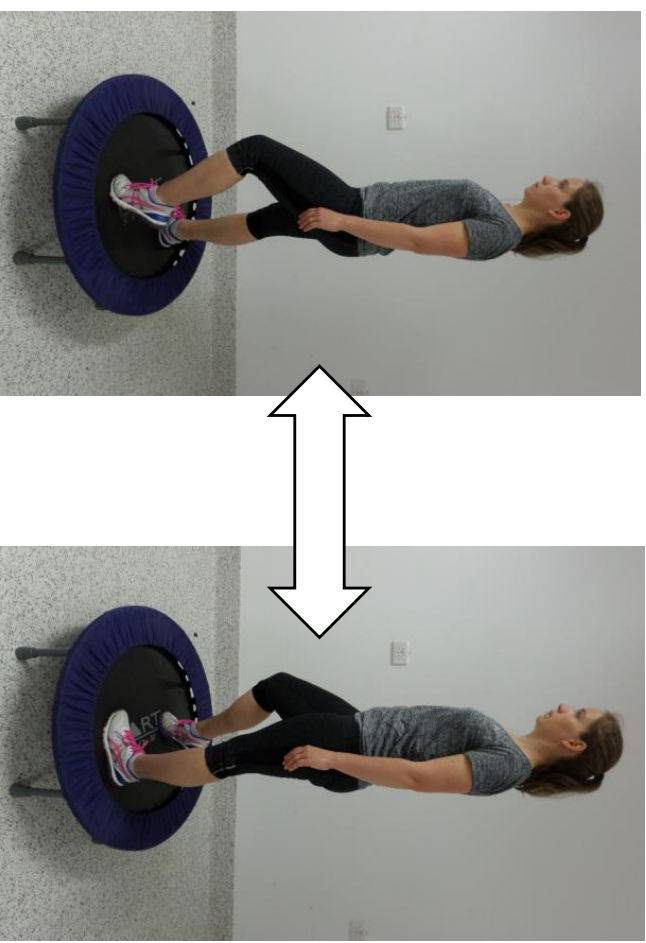

# Trampoline (Level 2) – side shuffle

## Start position:

Stand on the trampoline

## Movement:

Bounce sideways onto alternate feet, allow your heels to lift off the trampoline

## Key points:

Switch on pelvic floor muscles with each bounce, keep knees soft

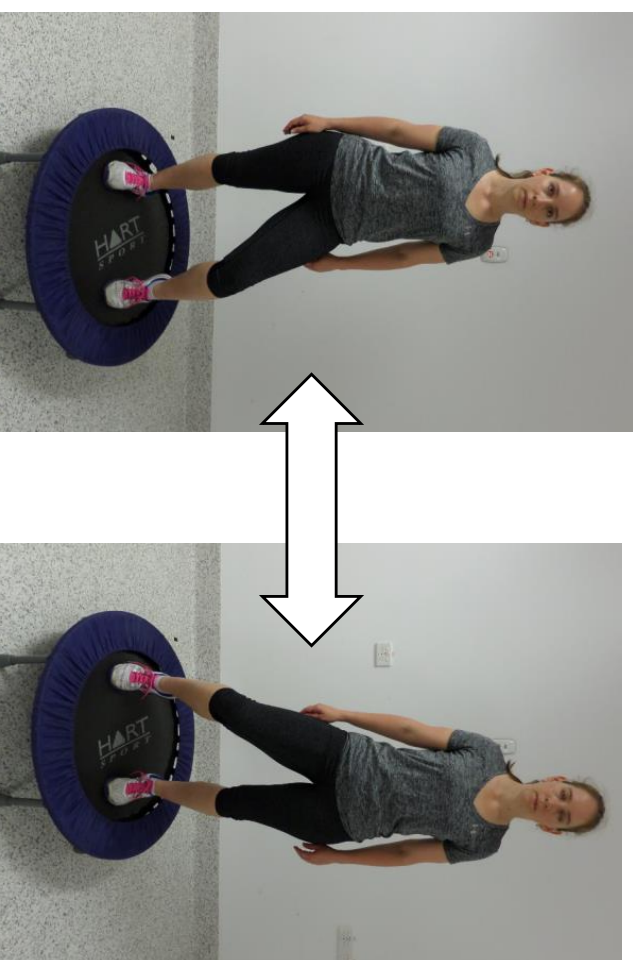

# Trampoline (Level 3) – jumping

Start position:

Stand on the trampoline

Movement:

Jump up and down on trampoline

Key points:

Switch on pelvic floor muscles with each bounce, keep knees soft

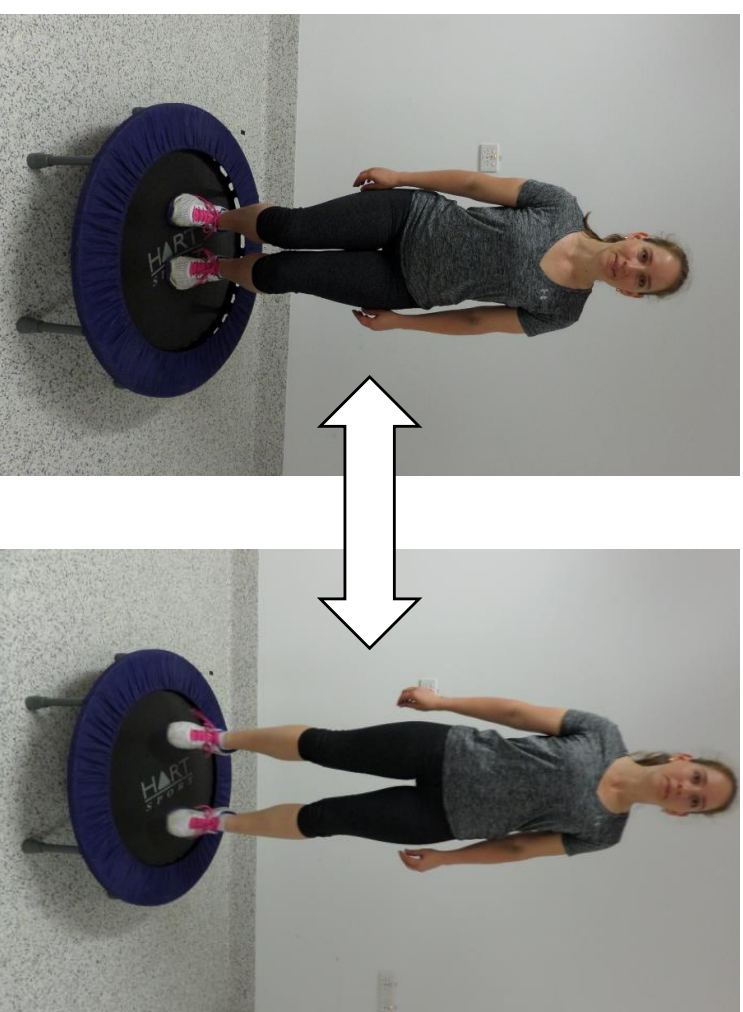

# Narrow Jumping (Level 1) – calf raises

## Start position:

Stand with feet together

## Movement:

Push onto your toes, keeping your feet on the ground at all times

## Key points:

Switch on pelvic floor muscles

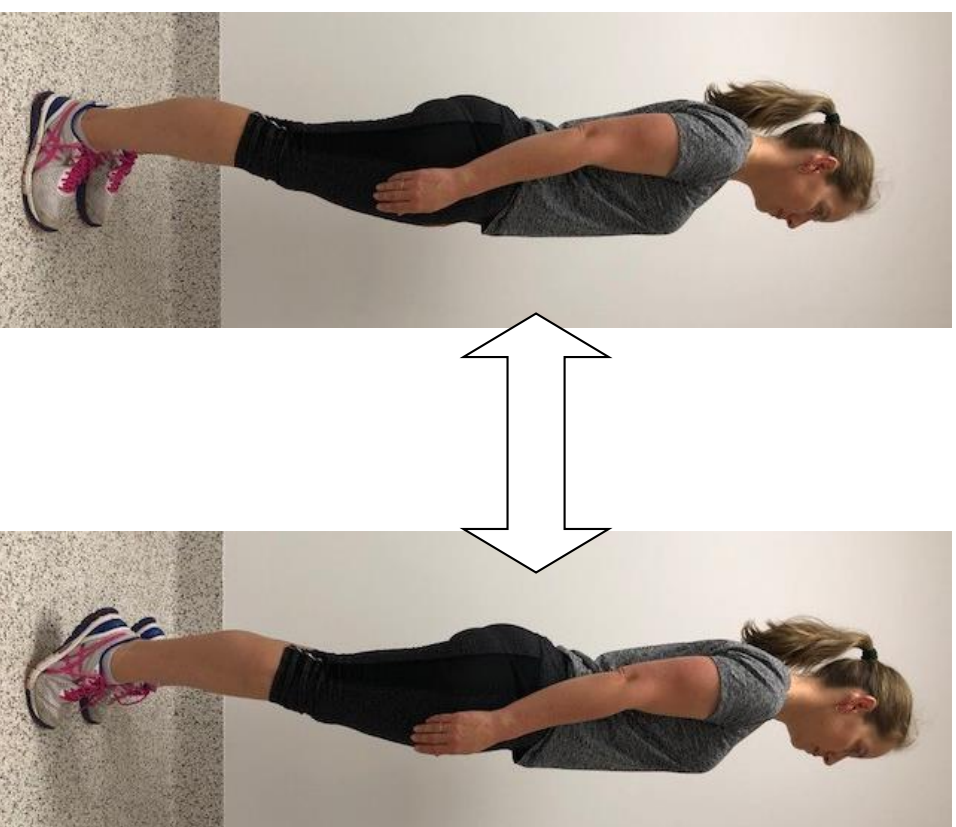

# Narrow Jumping (Level 2)

## – light jump

### Start position:

Stand with feet together

### Movement:

Lightly jump up and down

### Key points:

Switch on pelvic floor  
muscles with each bounce,  
keep knees soft

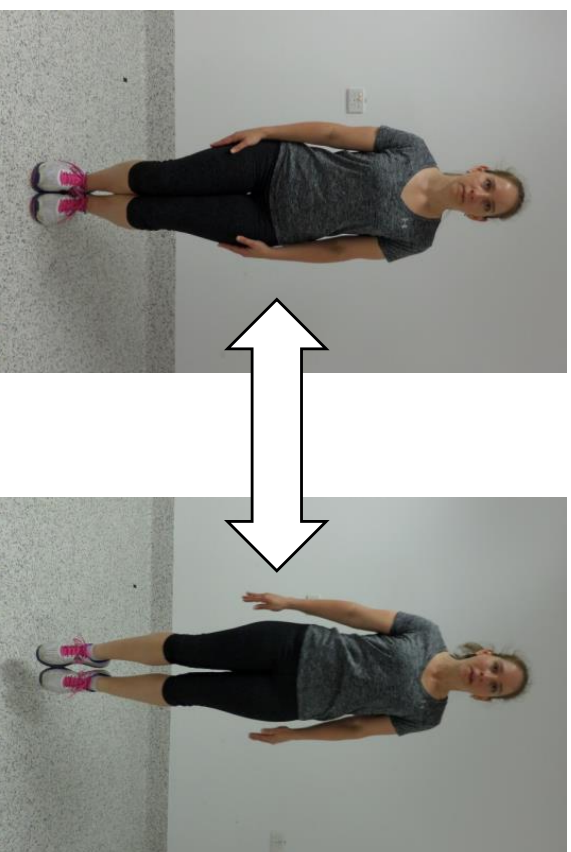

# Narrow Jumping (Level 3) – high jump

## Start position:

Stand with feet together

## Movement:

Jump up and down

## Key points:

Switch on pelvic floor  
muscles with each bounce,  
keep knees soft

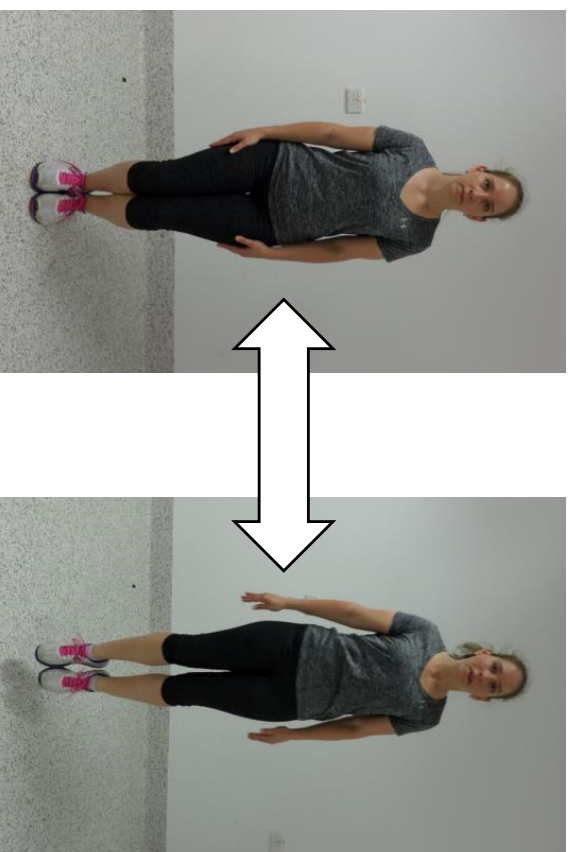



# Wide Jumping (Level 1) – calf raises

## Start position:

Stand with feet greater than shoulder width apart

## Movement:

Push onto your toes, keeping your feet on the ground at all times

## Key points:

Switch on pelvic floor muscles

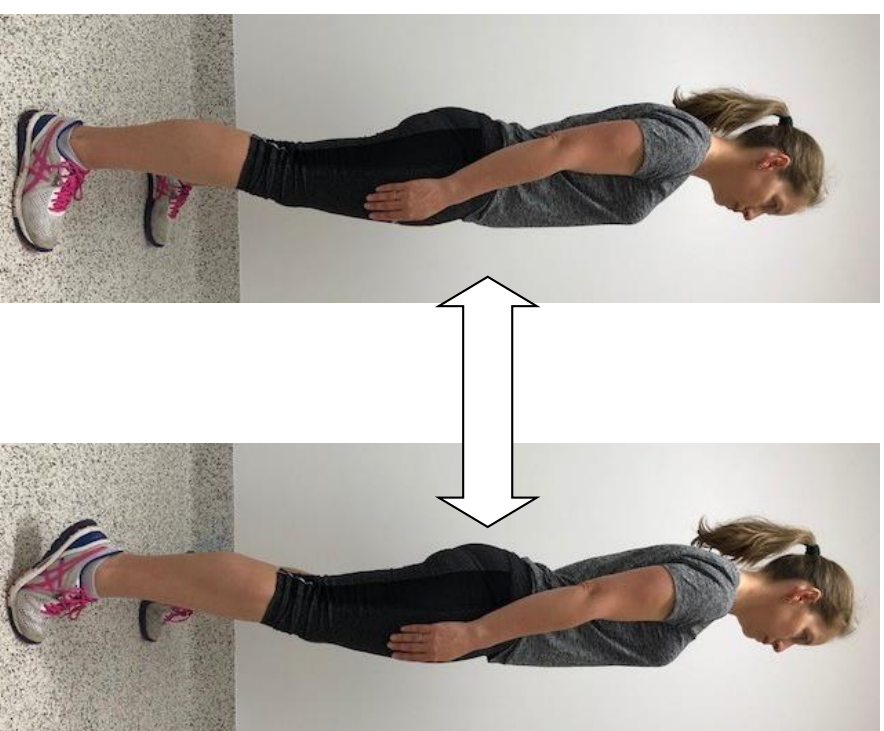

# Wide Jumping (Level 2) - light jump

## Start position:

Stand with feet greater than shoulder width apart

## Movement:

Lightly jump up and down

## Key points:

Switch on pelvic floor muscles with each bounce, keep knees soft

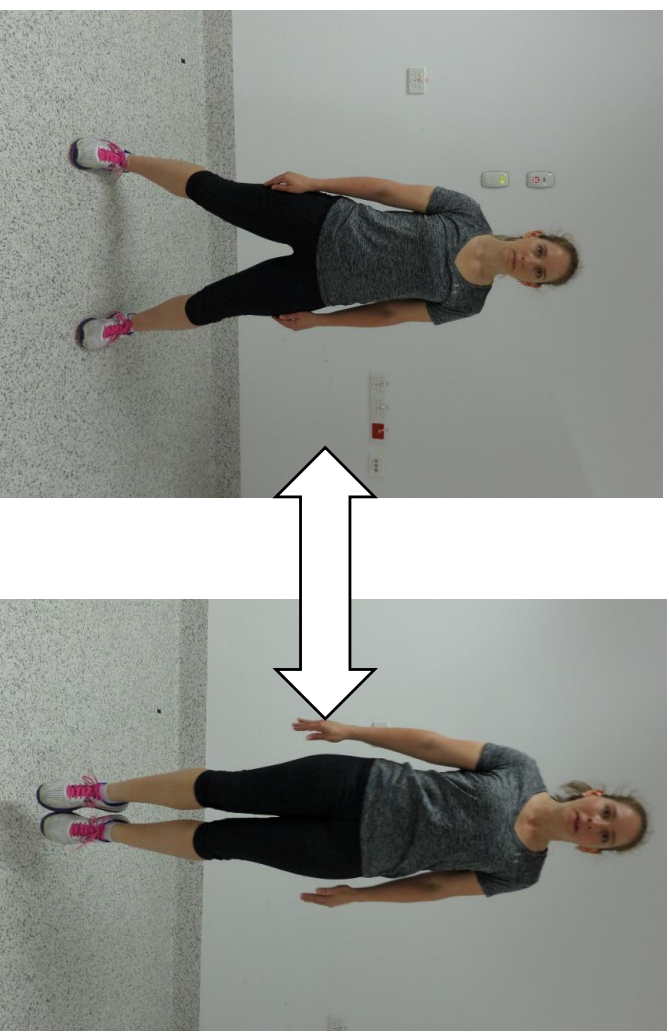



# Wide Jumping (Level 3) – star jumps

## Start position:

Stand with feet together

## Movement:

Jump feet outwards and  
back inwards towards centre

## Key points:

Switch on pelvic floor  
muscles with each  
bounce, keep knees soft

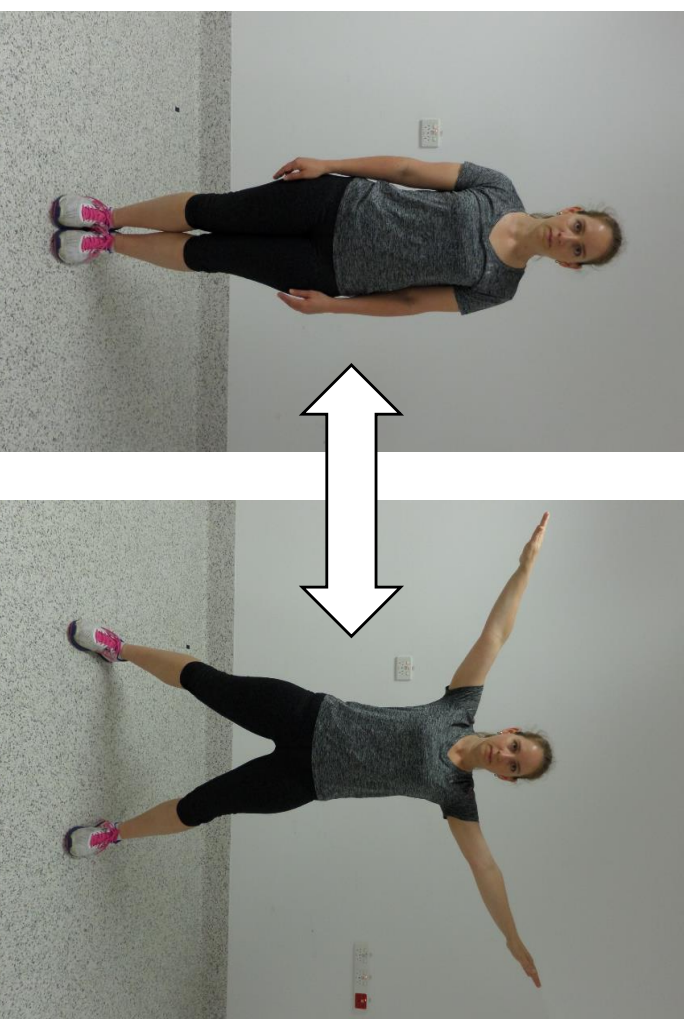

# Mountain climbers (level 1) – against bed/bench/rails

## Start position:

Leaning onto a bench putting weight through hands, keeping elbows straight, body in a straight line

## Movement:

Bend knees alternately to march feet on the spot

## Key points:

Draw in lower tummy, keep bottom down

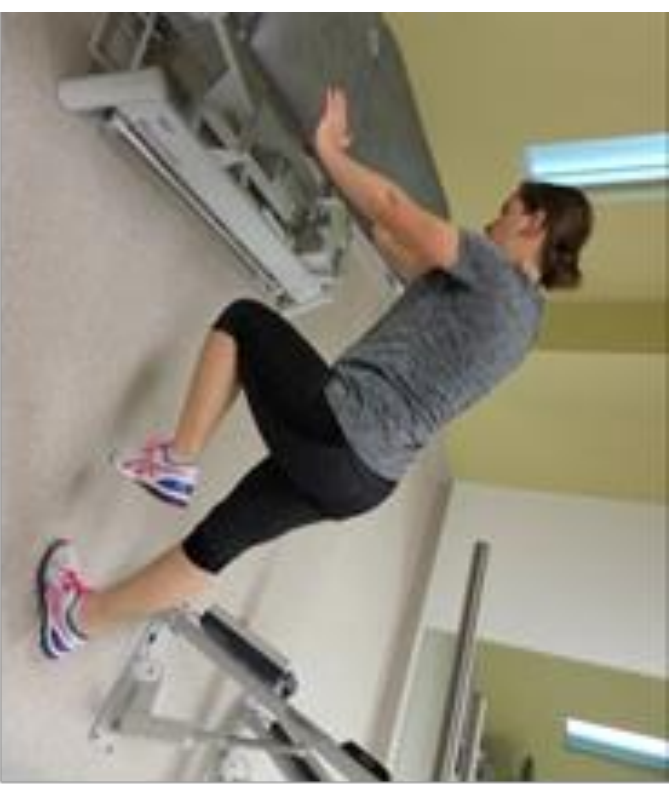

# Mountain climbers (level 2) – on the floor

## Start position:

On hands and toes, elbows straight  
Body in a straight line and weight through  
hands

## Movement:

Bend knees alternately to march feet on  
the spot

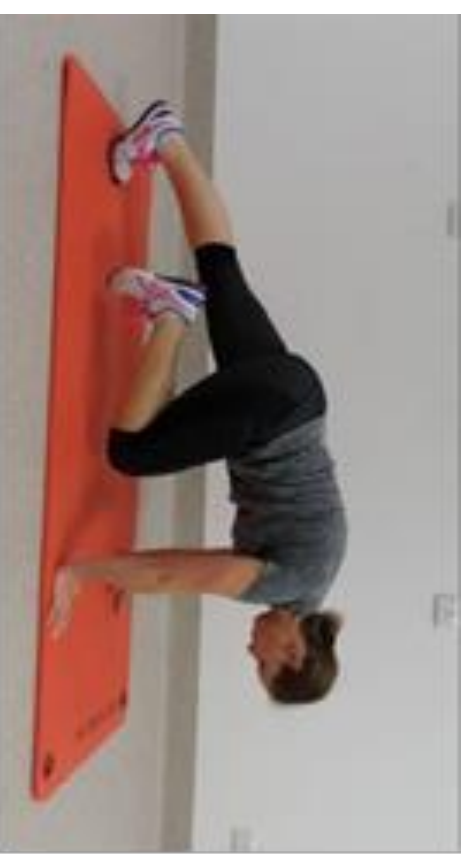

## Key points:

Draw in lower tummy, keep bottom down

# Mountain climbers (level 3) – on foam

## Start position:

On hands (on foam mat) and toes  
with elbow straight  
Body in a straight line and weight  
through hands

## Movement:

Bend knees alternately to march  
feet on the spot

## Key points:

Draw in lower tummy, keep bottom  
down

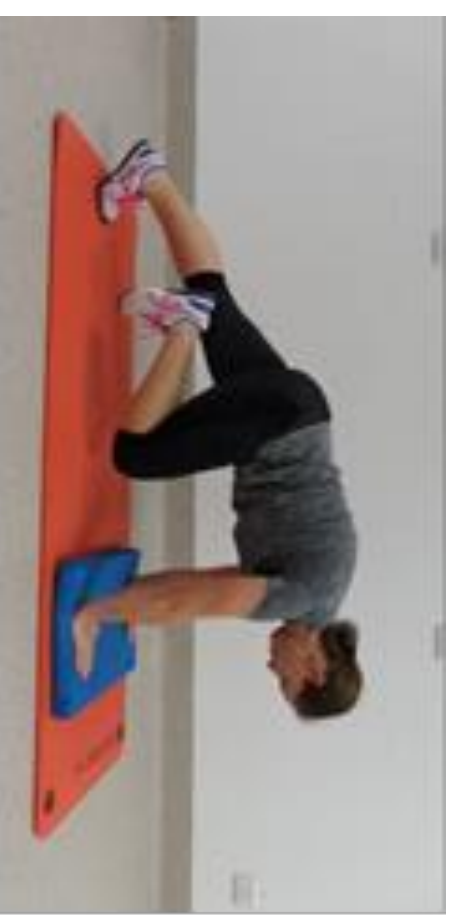

# Knee lifts (level 1)

## – knee lifts

### Start position:

Stand with feet shoulder width apart

Hold wall/chair for balance support if required

### Movement:

Lift knee up to hip height

Maintain upright posture

Alternate each leg

### Key points:

Draw in lower tummy

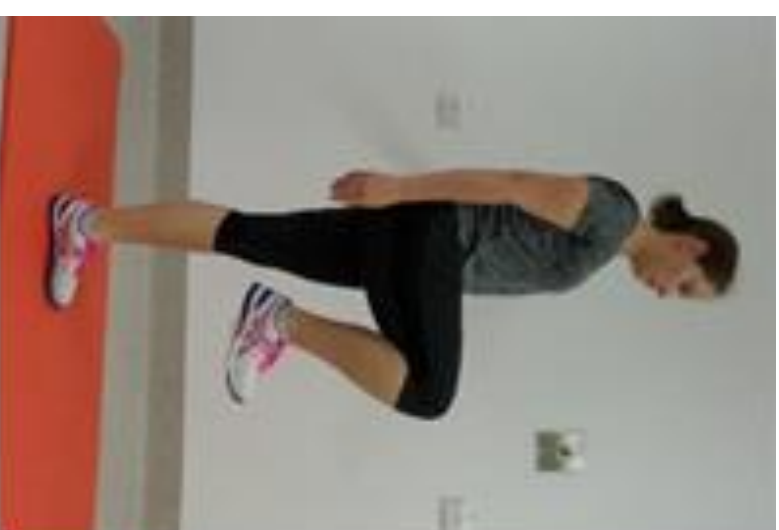

# Knee lifts (level 2) – with rotation crunch

## Start position:

Stand with feet shoulder width apart

## Movement:

Lift knee up to hip height

Rotate upper body to bring opposite elbow to knee

Return to upright posture

Alternate each arm and leg

## Key points:

Draw in lower tummy

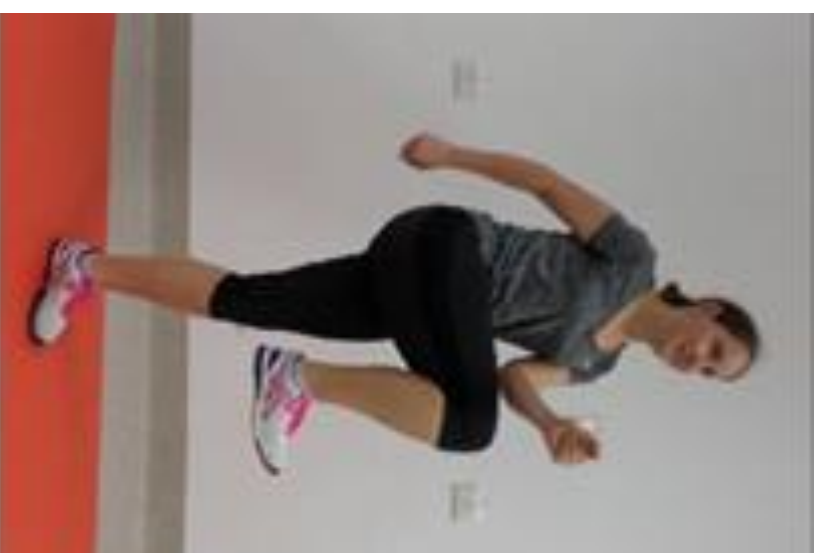

# Knee lifts (level 3) – with rotation crunch and squat

## Start position:

Stand with feet shoulder width apart

## Movement:

Lift knee up to hip height

Rotate upper body to bring opposite elbow to knee

Return to upright posture

Squat down

Repeat alternating sides

## Key points:

Draw in lower tummy

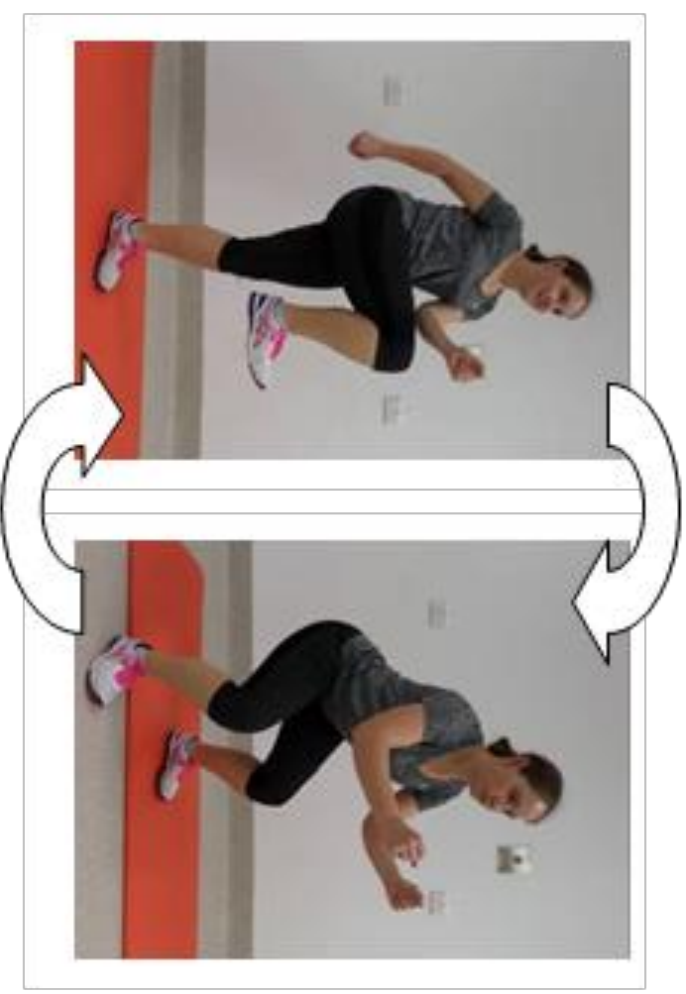



# Burpees (level 1)

## – step out burpee on bed/wall

### Start position:

Stand in mini squat position

### Movement:

Lean forwards to place hands onto bed/wall

Step feet backwards into plank position

Step feet forwards into squat position

Repeat

### Key points:

Draw in lower tummy and keep bottom down when in plank

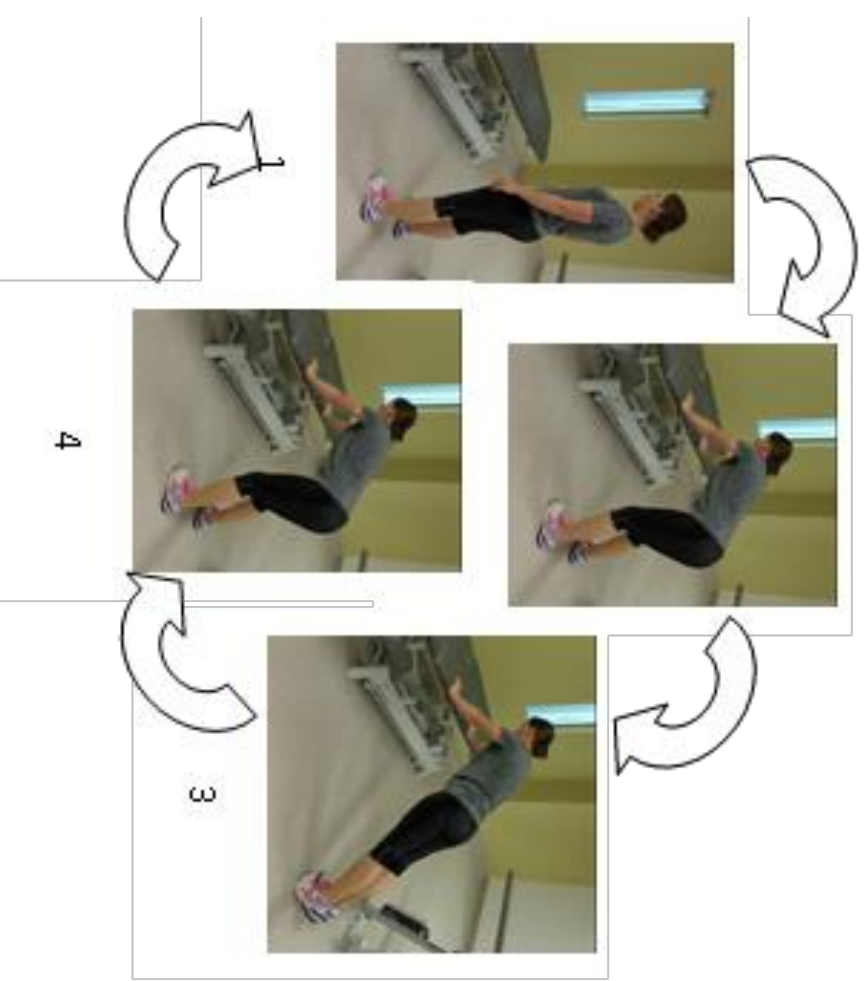



# Burpee (level 2)

## – step out burpee on floor

### Start position:

Stand in upright position

### Movement:

Squat down to place hands on floor in front of you

Step feet backwards into plank position

Step feet forwards into full squat position

Stand up

Repeat

### Key points:

Draw in lower tummy and keep bottom down when in plank

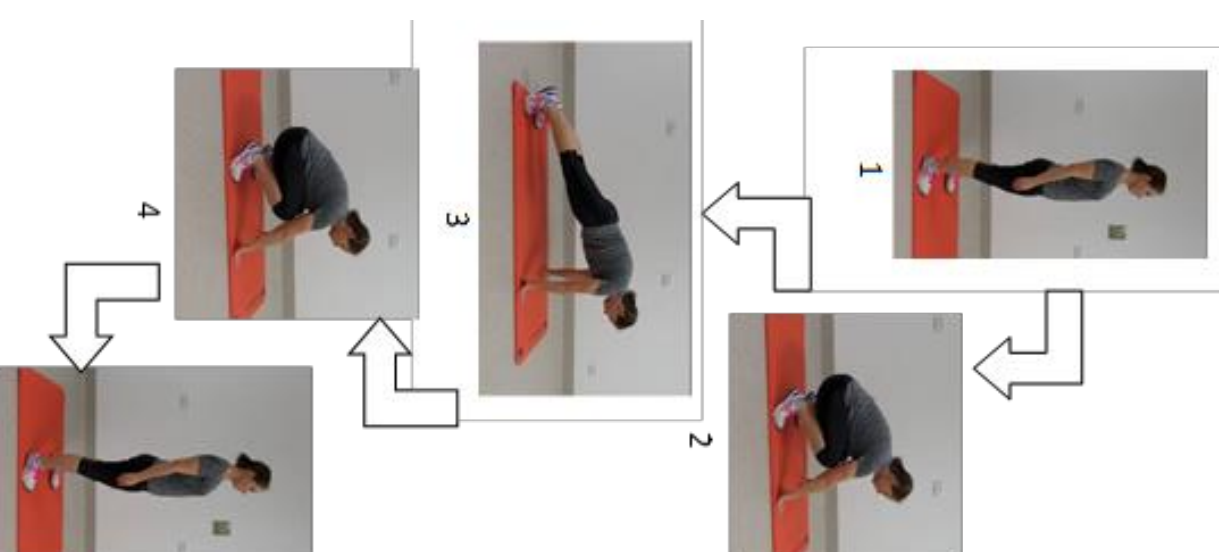

# Burpee (level 3) – jumping burpee

## Start position:

Start in standing squat position

## Movement:

Squat down to place hands on floor in front of you

Jump feet backwards into plank position

Jump feet forwards into full squat position

Stand up and reach up tall

Repeat

## Key points:

Draw in lower tummy and keep bottom down when in plank

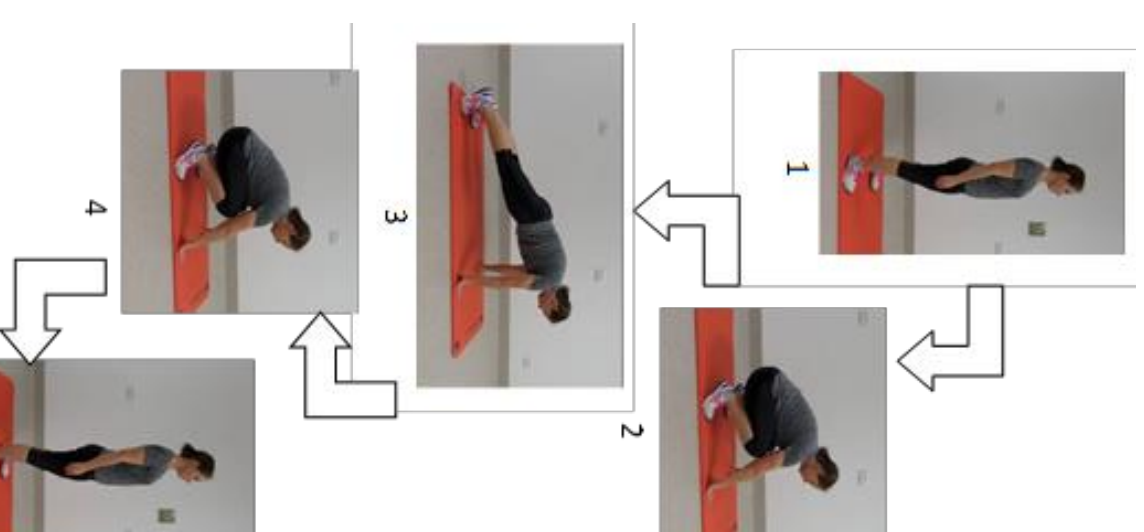

# Punches (level 1) – with no weight

## Start Position:

Stand upright with feet apart

Hands positioned with fists in front of chest

## Movement:

Straight – punch alternate fists out front with effort

Upper cuts – punch alternate fists from hip to on front of chest

Hooks – punch alternate fists from shoulder around to front of chest

## Key points:

Draw in lower tummy to stabilise

**Gold Coast Health**  
Building a healthier community

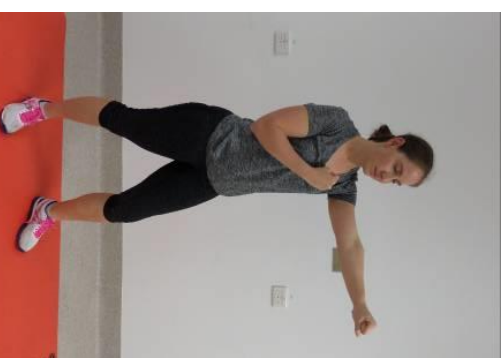

STRAIGHT

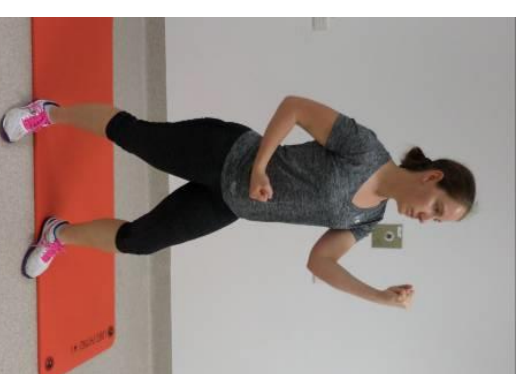

UPPER CUTS

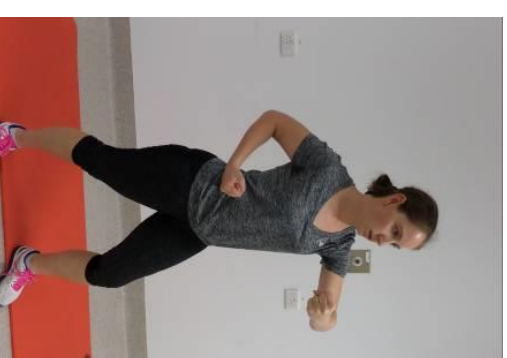

HOOKS

# Punches (level 2) – with 0.5kg weight

## Start position:

Stand upright with feet apart

Hands positioned with fists in front of chest

## Movement:

Straight – punch alternate fists out front with effort

Upper cuts – punch alternate fists from hip to on front of chest

Hooks – punch alternate fists from shoulder around to front of chest

## Key points:

Draw in lower tummy to stabilise

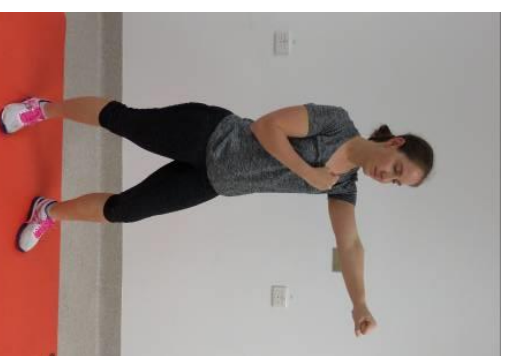

STRAIGHT

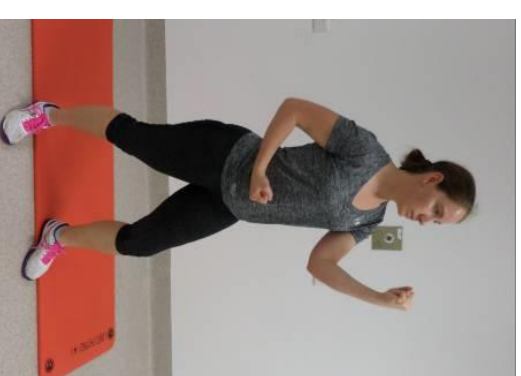

UPPER CUTS

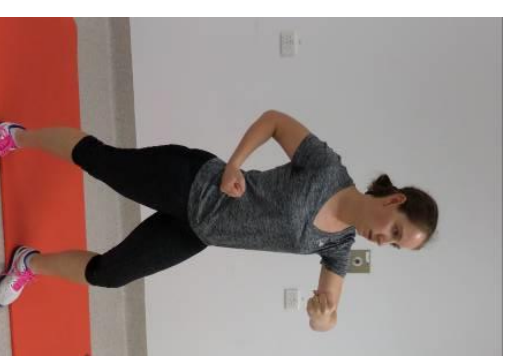

HOOKS

# Punches (level 3) – with 1kg weight

## Start position:

Stand upright with feet apart

Hands positioned with fists in front of chest

## Movement:

Straight – punch alternate fists out front with effort

Upper cuts – punch alternate fists from hip to on front of chest

Hooks – punch alternate fists from shoulder around to front of chest

## Key points:

Draw in lower tummy to stabilise

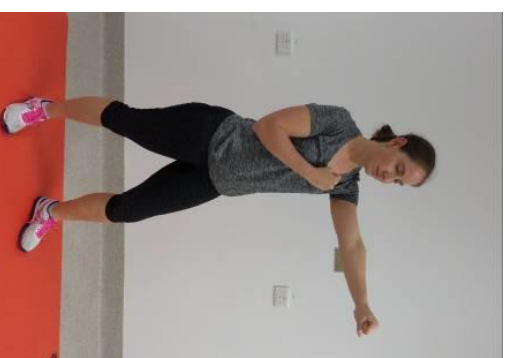

STRAIGHT

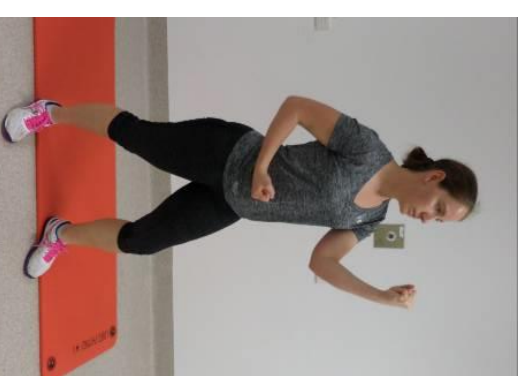

UPPER CUTS

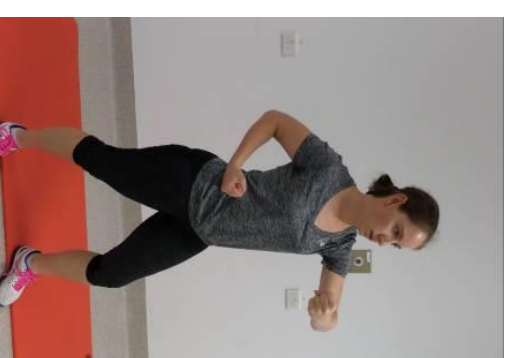

HOOKS

# Bike (level 1) – low resistance

Start position:

Sitting on bike

Movement:

Pedal fast on a low resistance

Key points:

Sit tall

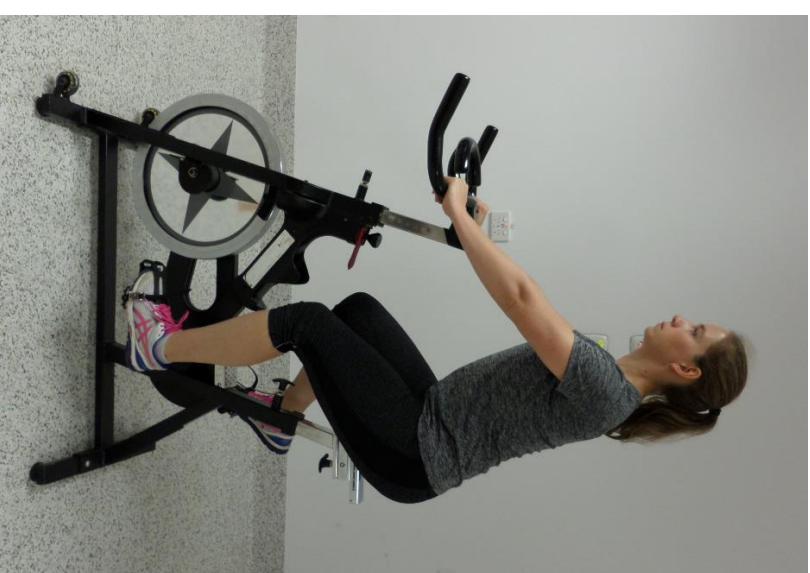



# Bike (level 2) – moderate resistance

Start position:

Sitting on bike

Movement:

Pedal with moderate resistance

Key points:

Sit tall

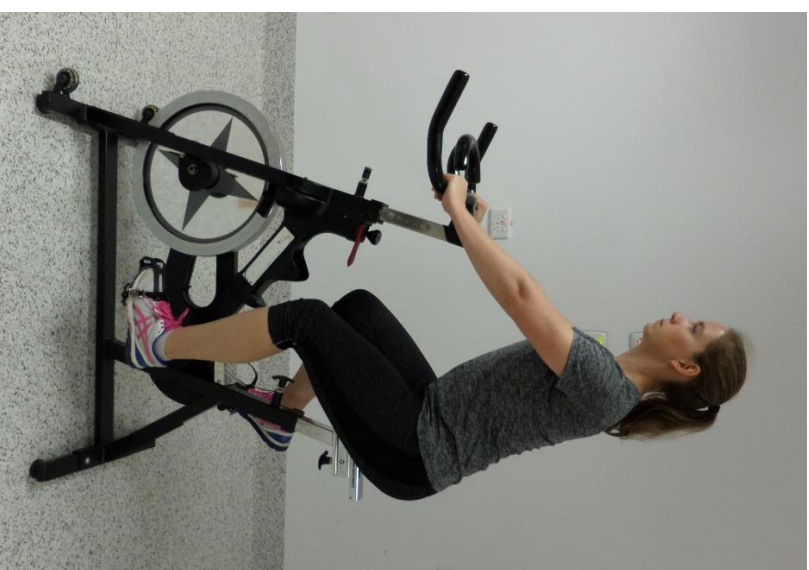

# Bike (level 3) – high resistance

Start position:

Standing on bike

Movement:

Pedal with high resistance

Key points:

Stand tall

Switch on your pelvic floor muscles

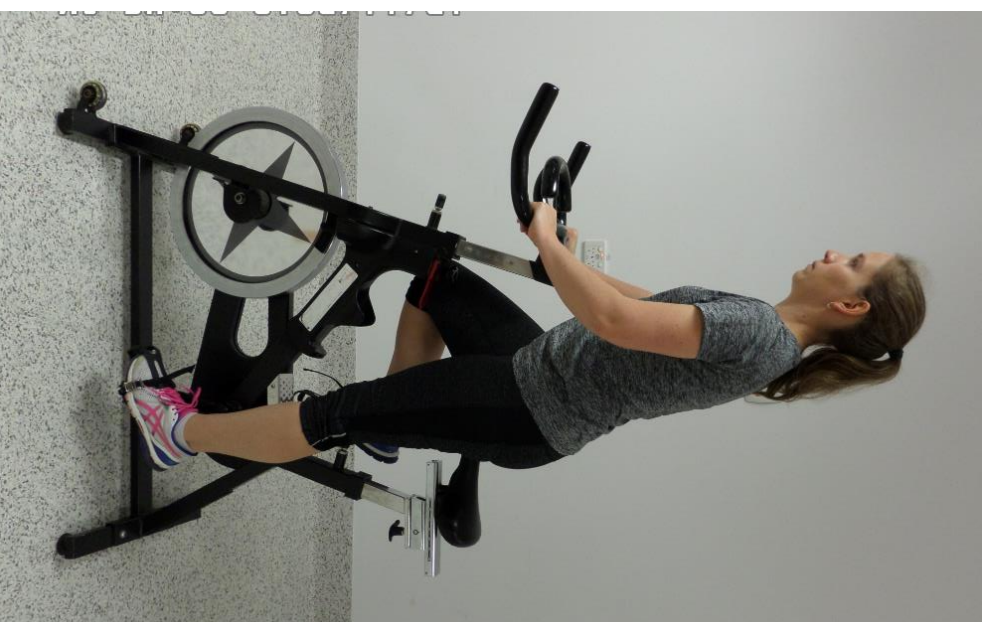



# Plank (level 1) – on knees

## Start position:

On elbows and knees with weight forwards onto elbows and pelvis close to the floor

## Movement:

Hold still

## Key points:

Draw in lower tummy, tuck pelvis under, breathe

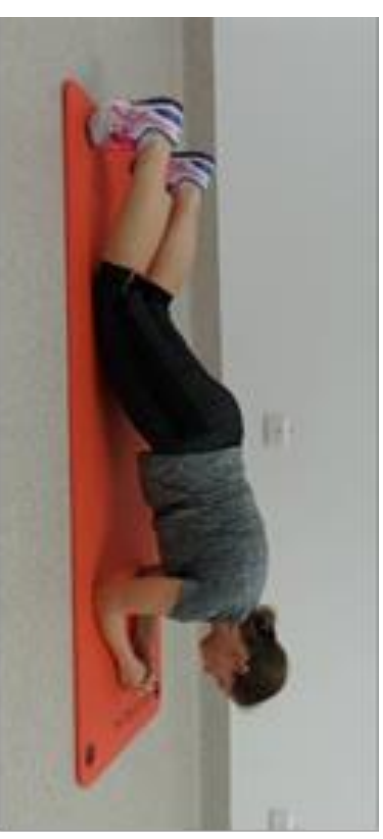

# Plank (level 2) – on toes

## Start position:

On elbows and toes with body in a straight line

Weight forwards onto elbows

## Movement:

Hold still

## Key points:

Draw in lower tummy, tuck pelvis under, breathe

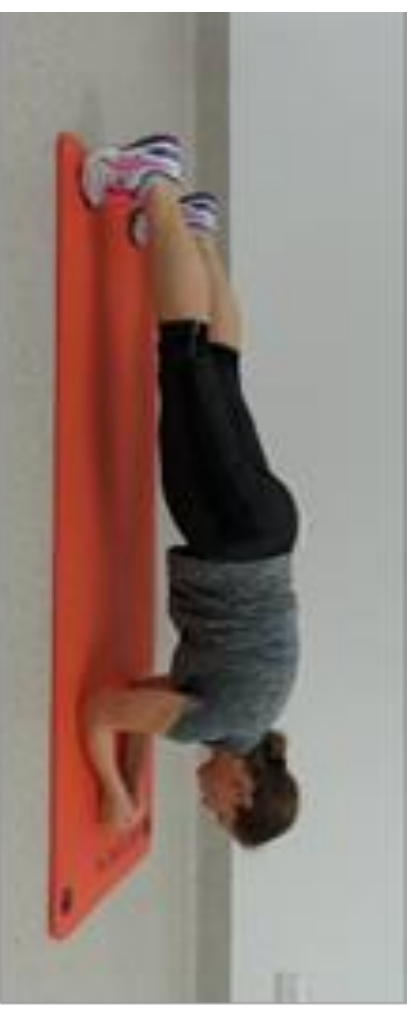

# Plank (level 3) – with back leg lift

## Start position:

On elbows and toes with body in a straight line

Weight forwards onto elbows

## Movement:

Slowly kick straight leg towards ceiling keeping leg straight

Repeat with the other leg

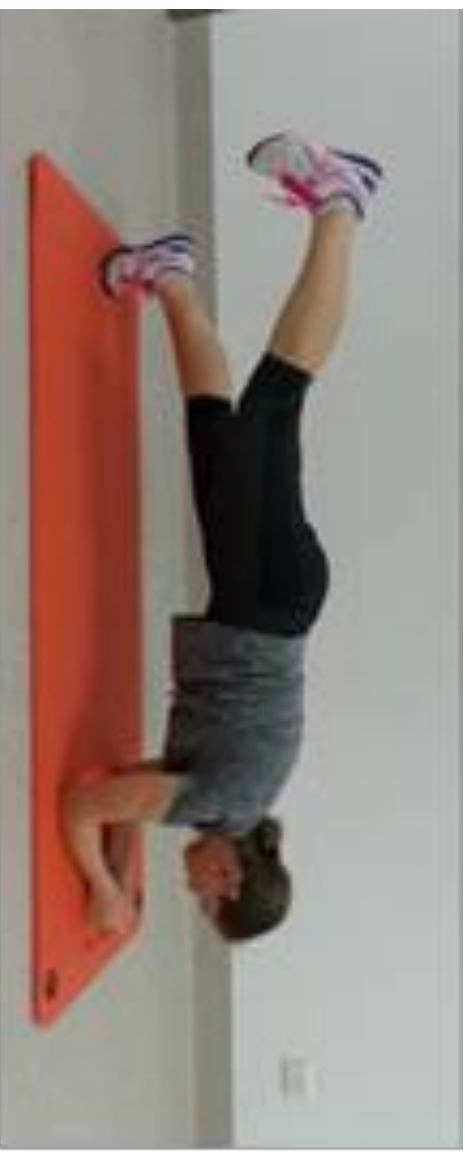

## Key points:

Draw in lower tummy, tuck pelvis under, breathe

# Table top leg extension (level 1) – single leg small

## Start position:

Lie on your back with knees bent, feet on floor

## Movement:

Lift one leg to make a table top

Extend leg out straight keeping it high

Bend back to table top

Return foot to mat

Repeat on the other side

## Key points:

Draw in lower tummy, gently flatten back into floor, breathe

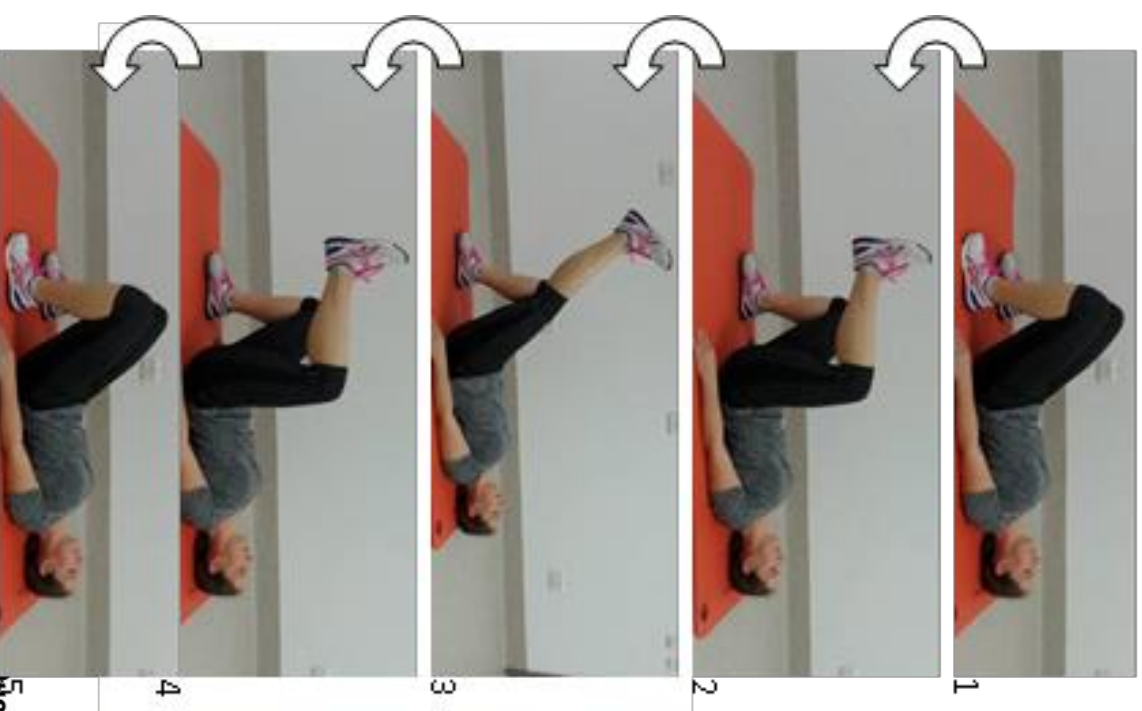

# Table top leg extension (level 2) – single leg big

## Start position:

Lie on your back with knees bent, feet on floor

## Movement:

Lift one leg into table top

Extend leg out straight taking it close to the floor

Bend back to table top

Return foot to mat

Repeat on the other side

## Key points:

Draw in lower tummy, gently flatten back into floor, breathe

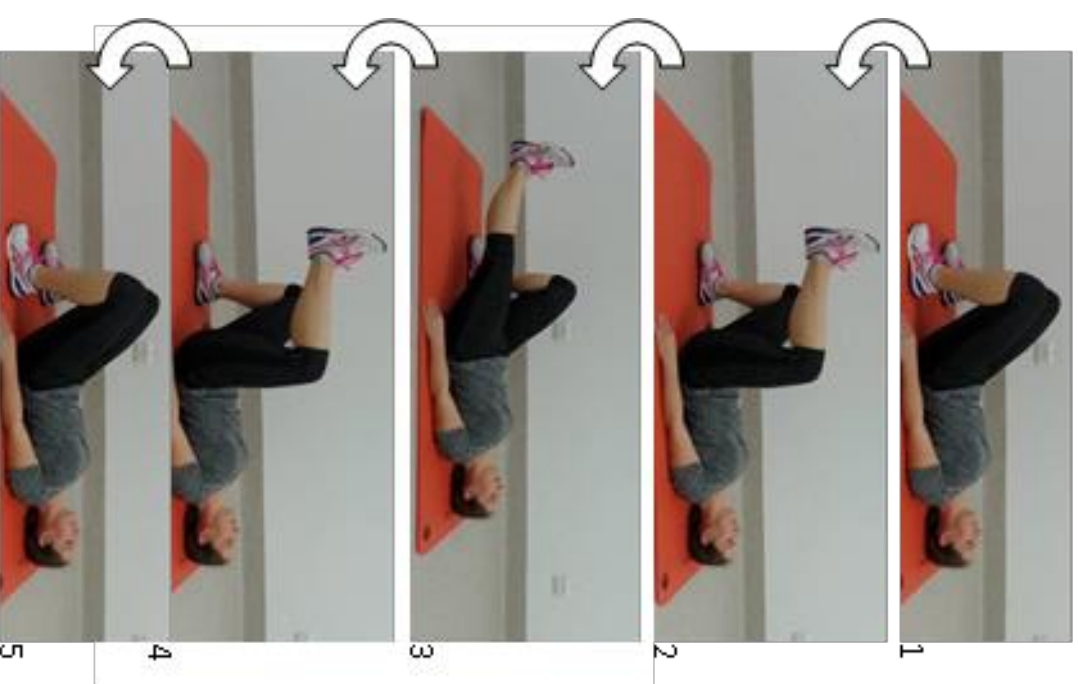

# Table top leg extension (level 3) – double table top

## Start position:

Lie on your back with knees bent

## Movement:

Lift one leg at a time into tabletop

Lower one leg at a time down

## Key points:

Draw in lower tummy, gently  
flatten back into floor, breathe

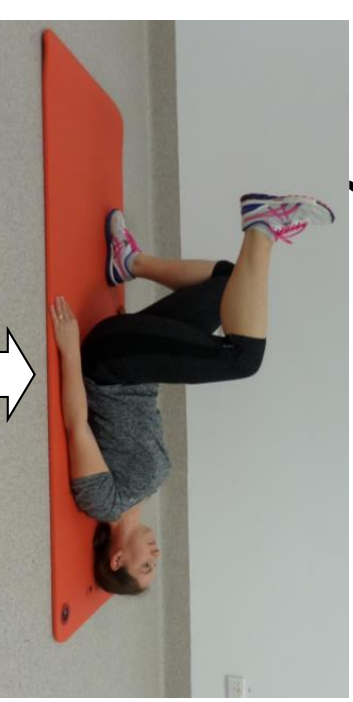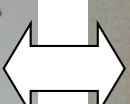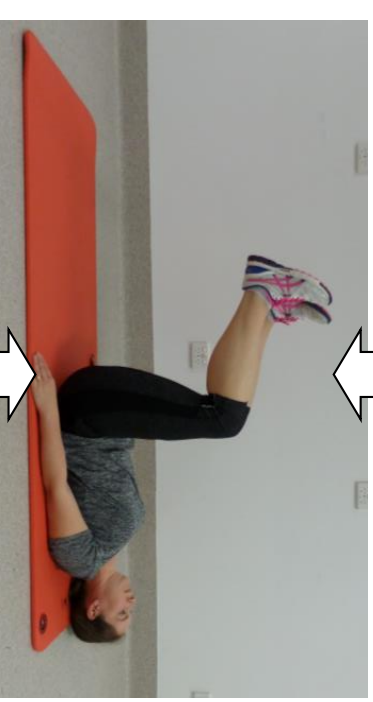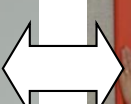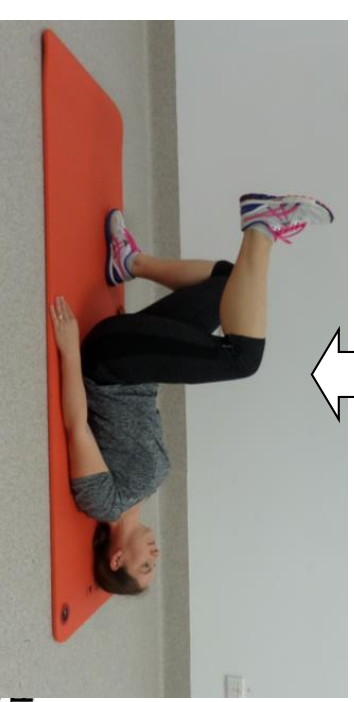

# Crunching (level 1) – knee crunch

Start position:

4-point kneeling

Movement:

Tuck knee up to chest

Hold for 2-3sec

Extend leg out behind and touch  
toes to floor

Repeat

Repeat on the other side

Key points:

Draw in lower tummy, breathe

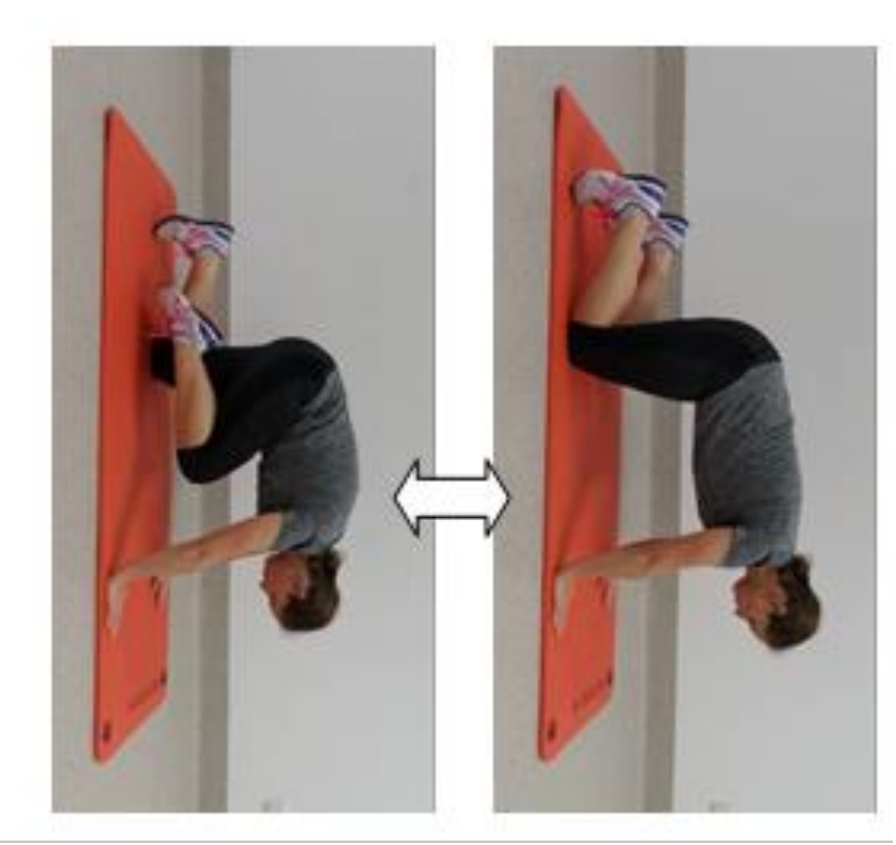



# Crunching (level 2)

## – bicycle crunch with toe touches

Start position:

Sit on chair

Movement:

Cycle/alternate legs up and down  
touching feet onto floor

Key points:

Stable back position by drawing in  
tummy, breathe

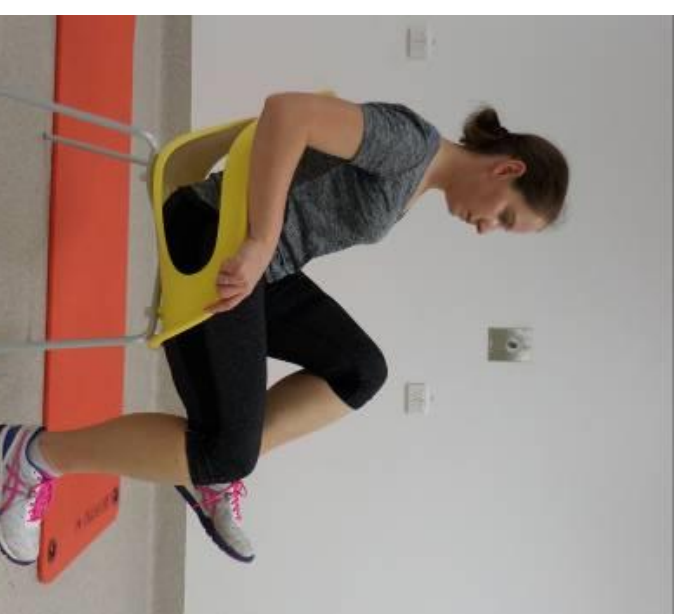

# Crunching (level 3)

## – bicycle crunch without toe touches

### Start position:

Sit on chair

### Movement:

Cycle/alternate legs up and down  
keeping feet off floor

### Key points:

Stable back position by drawing in  
tummy, breathe

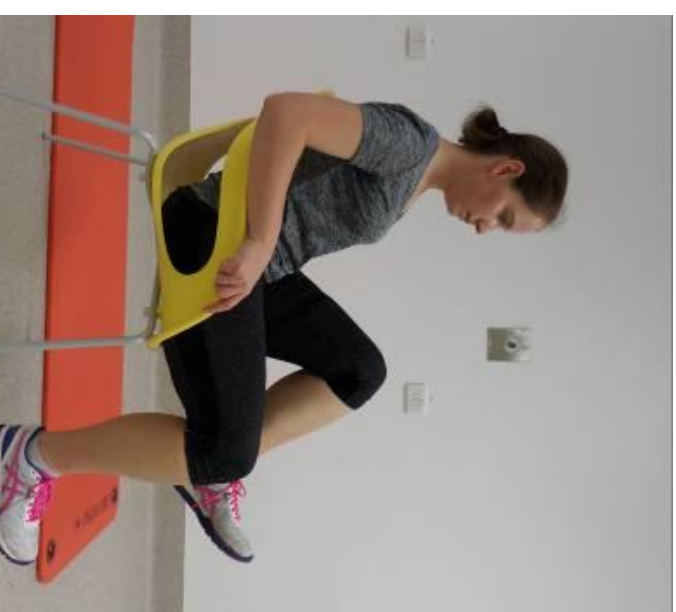

# Bird Dogs (level 1) – single arm and leg

## Start position:

4 point kneel onto hands and knees

## Movement:

Extend your arm and return to 4 point kneel

Extend your leg and return to 4 point kneel

Alternate sides

## Key points:

Draw in lower tummy, breathe

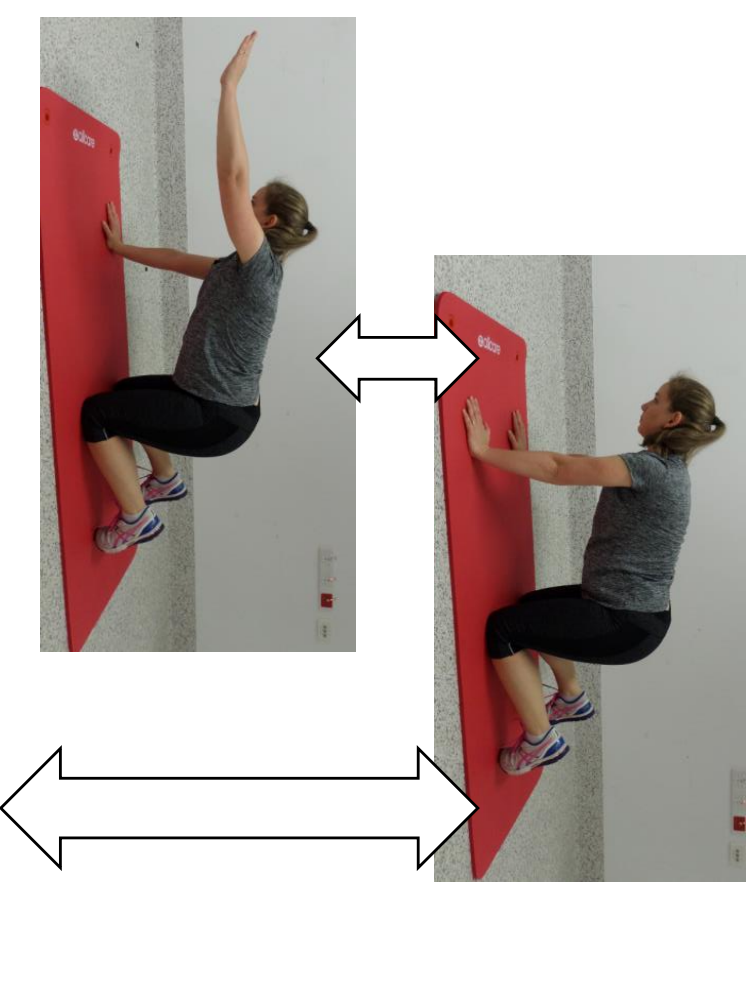

# Bird Dogs (level 2)

## —opposite arm and leg on knees

### Start position:

4 point kneel onto hands and knees

### Movement:

Extend your opposite arm and leg  
and return to 4 point kneel

Alternate between sides

### Key points:

Draw in lower tummy, breathe

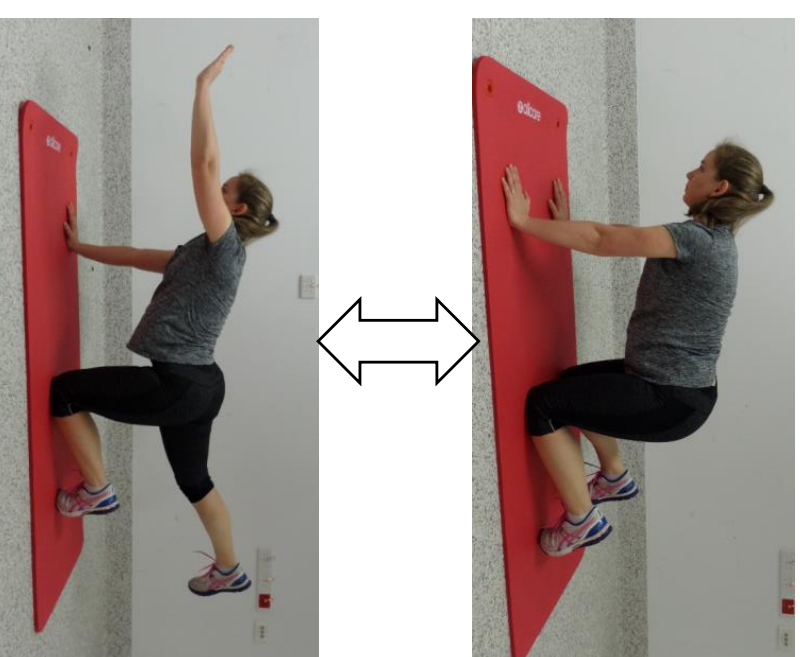

# Bird Dogs (level 3)

## – opposite arm and leg in plank

### Start position:

On elbows and toes with body in a straight line  
Weight forwards onto elbows

### Movement:

Hold plank and extend opposite arm and leg  
Alternate between sides

### Key points:

Draw in lower tummy, breath awareness

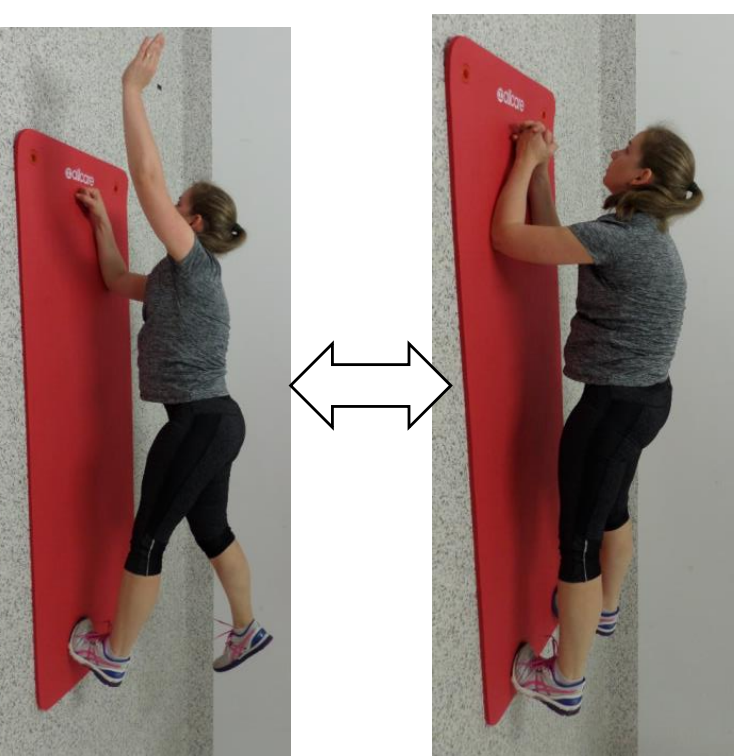

# Side Plank (level 1) – knees

## Start position:

Rest onto your side with your knees bent.

Keep your shoulders, hips, and knees are in a straight line

## Movement:

Lift your hips off the ground

## Key points:

Draw in lower tummy, breathe

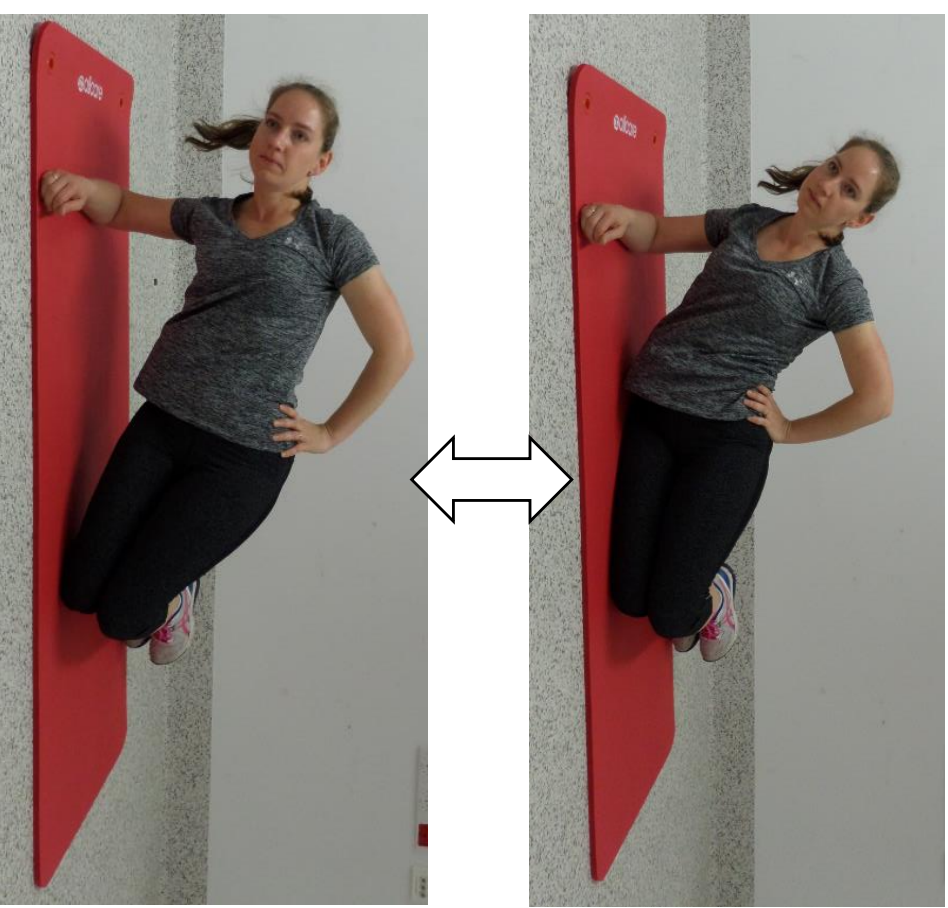



## Side Plank (level 2) – toes

### Start position:

Rest onto your side with your legs straight.

Keep your shoulders, hips, knees, and feet are in a straight line

### Movement:

Lift your hips and knees off the ground

### Key points:

Draw in your lower tummy, breathe

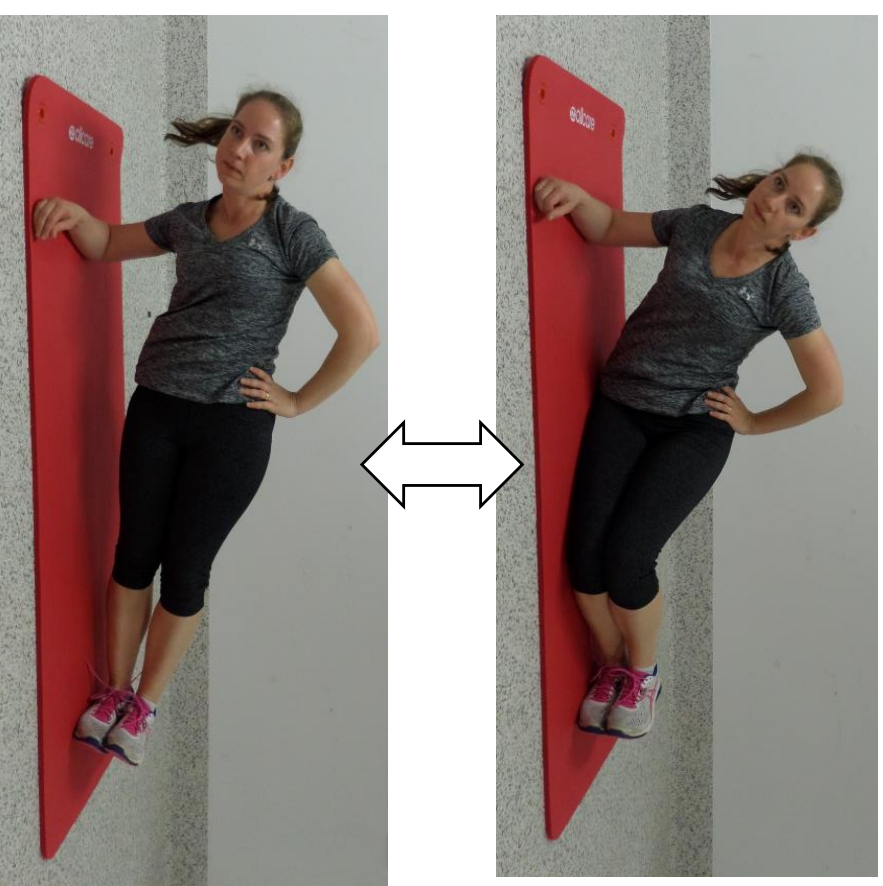



## Side Plank (level 3) – toes with arm extended

### Start position:

Rest onto your side with your legs straight.

Keep your shoulders, hips, knees, and feet are in a straight line

### Movement:

Lift your hips and knees off the ground and extend your top arm toward the ceiling

### Key points:

Draw in your lower tummy, breathe

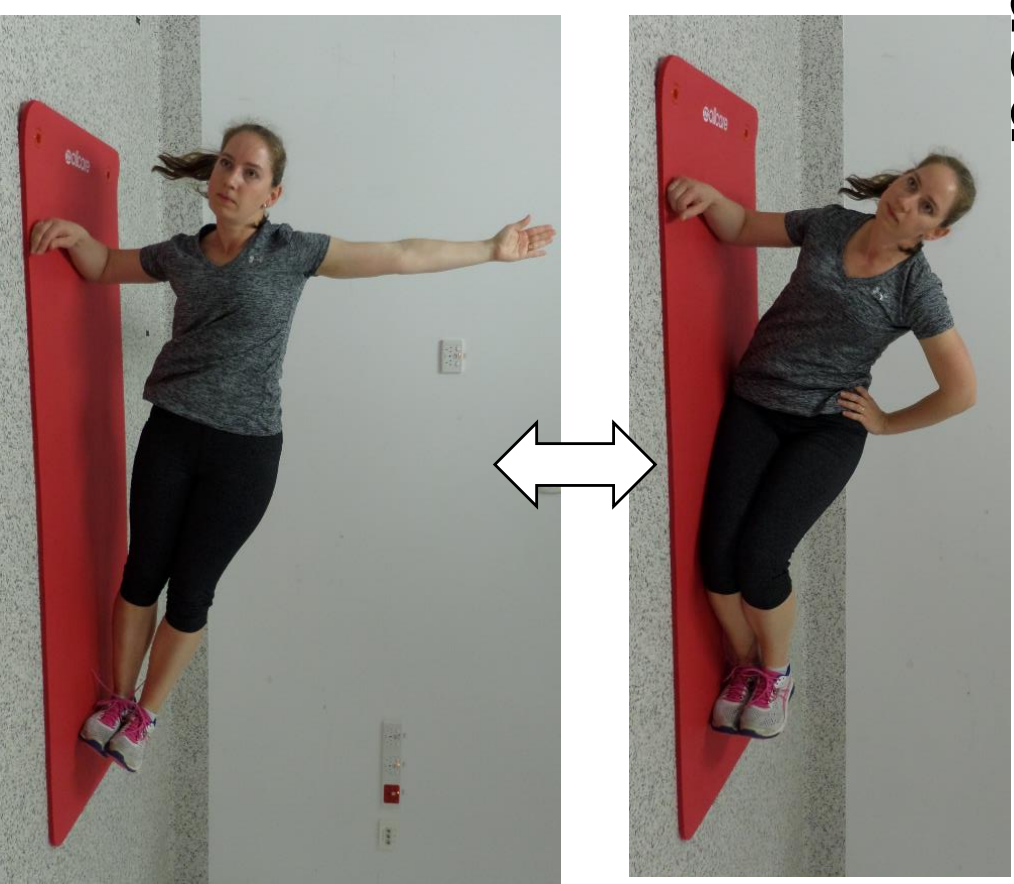

# Crunches (level 1) – knees

## Start position:

Lie on your back with your knees bent

## Movement:

Draw in your lower tummy and your pelvic floor as you slide your arms up your knees

## Key points:

Draw in lower tummy and pelvic floor muscles

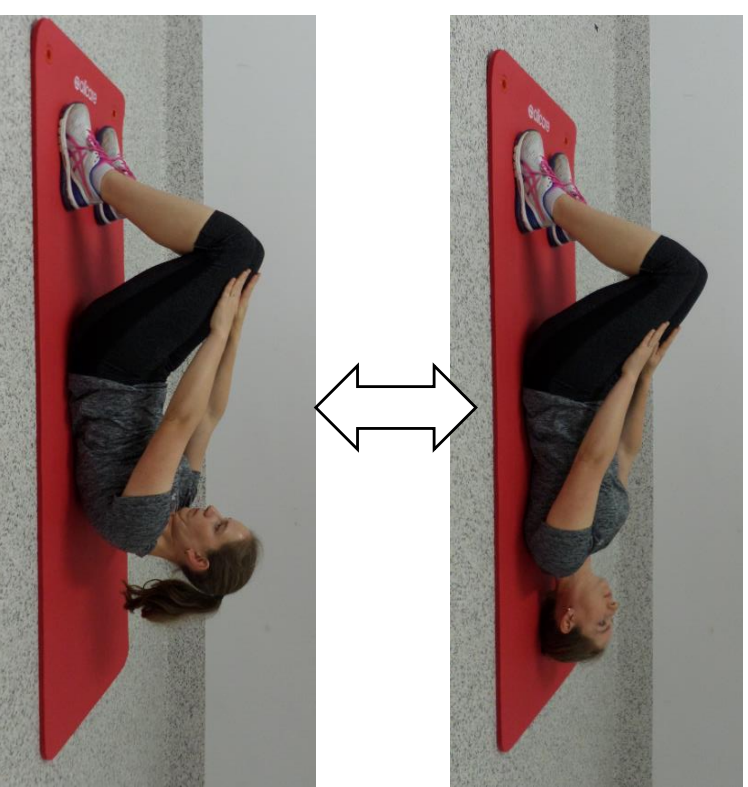

# Crunches (level 2) – sit-up

## Start position:

Lie on your back with your knees bent

## Movement:

Draw in your lower tummy and your pelvic floor as you move into a sit position

## Key points:

Draw in lower tummy and pelvic floor muscles, use something to stabilise your feet if required

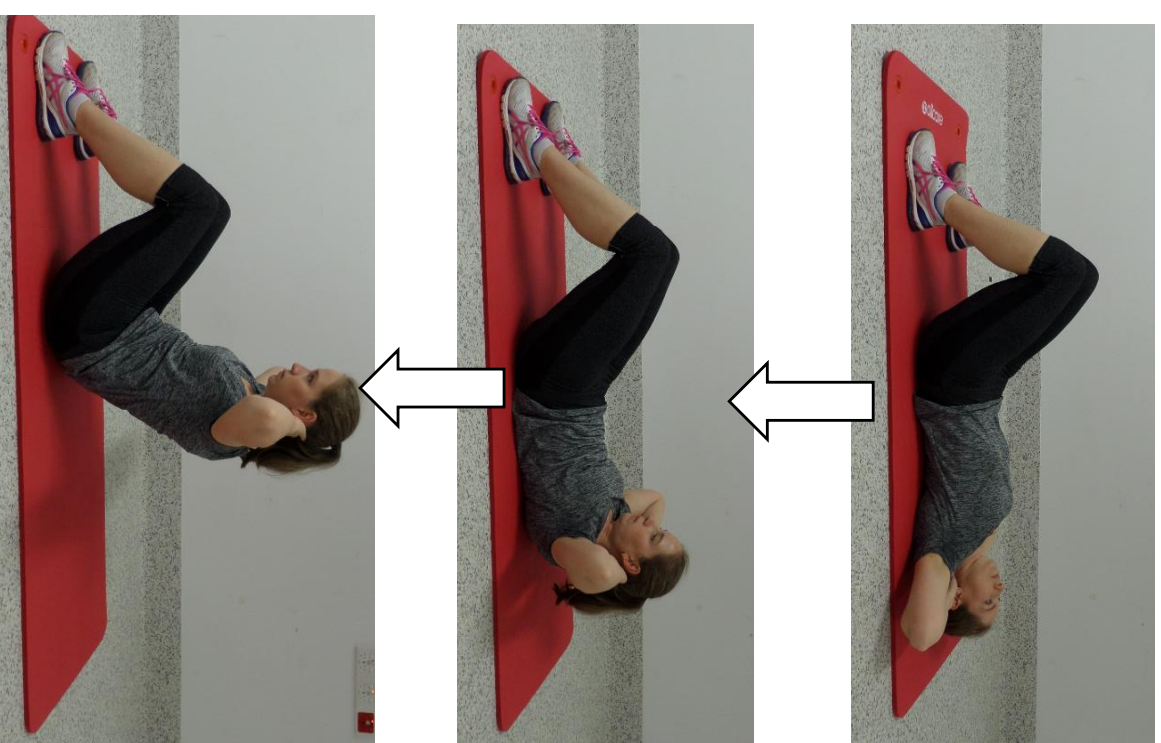

# Crunches (level 3) – dumbbell sit-up

## Start position:

Lie on your back with your knees bent

## Movement:

Draw in your lower tummy and your pelvic floor as you move into a sit position holding a dumbbell in your hands

## Key points:

Draw in lower tummy and pelvic floor muscles, breathe

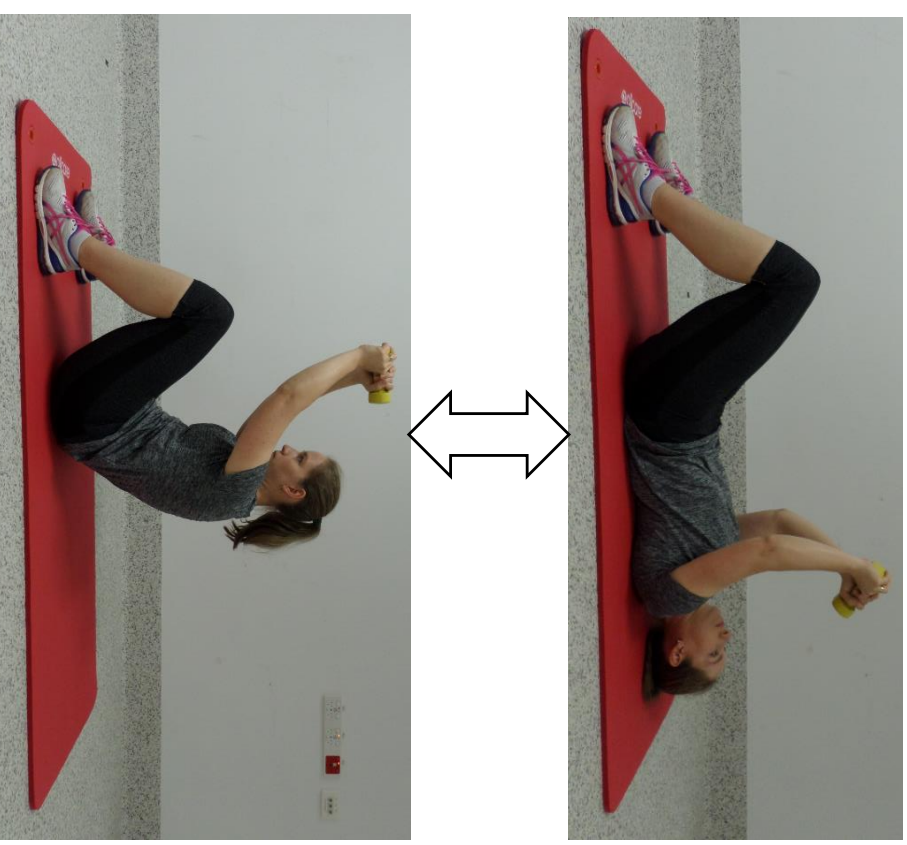



# Oblique Crunches (level 1)

## - hands behind head

### Start position:

Lie on your back with your knees bent

### Movement:

Draw in your lower tummy and your pelvic floor as you move your right shoulder to left knee

Keep lower back on floor

Repeat alternative sides

### Key points:

Draw in lower tummy and pelvic floor muscles, breathe

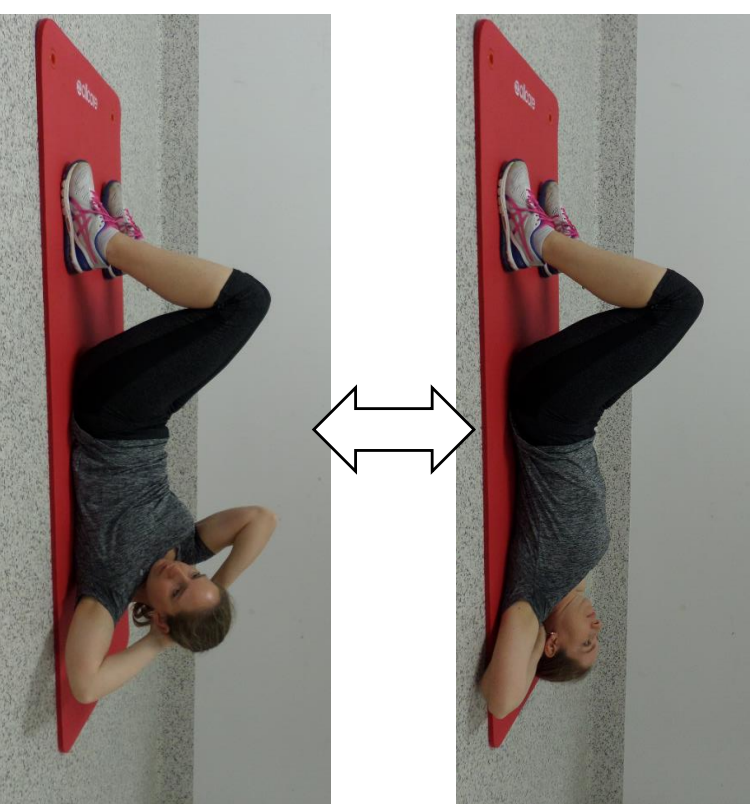

# Oblique Crunches (level 2)

## - half sit up

### Start position:

Balance with feet flat on floor

### Movement:

Draw in your lower tummy and your pelvic floor as you move your right shoulder to left knee

Repeat alternative sides

### Key points:

Draw in your lower tummy and pelvic floor muscles

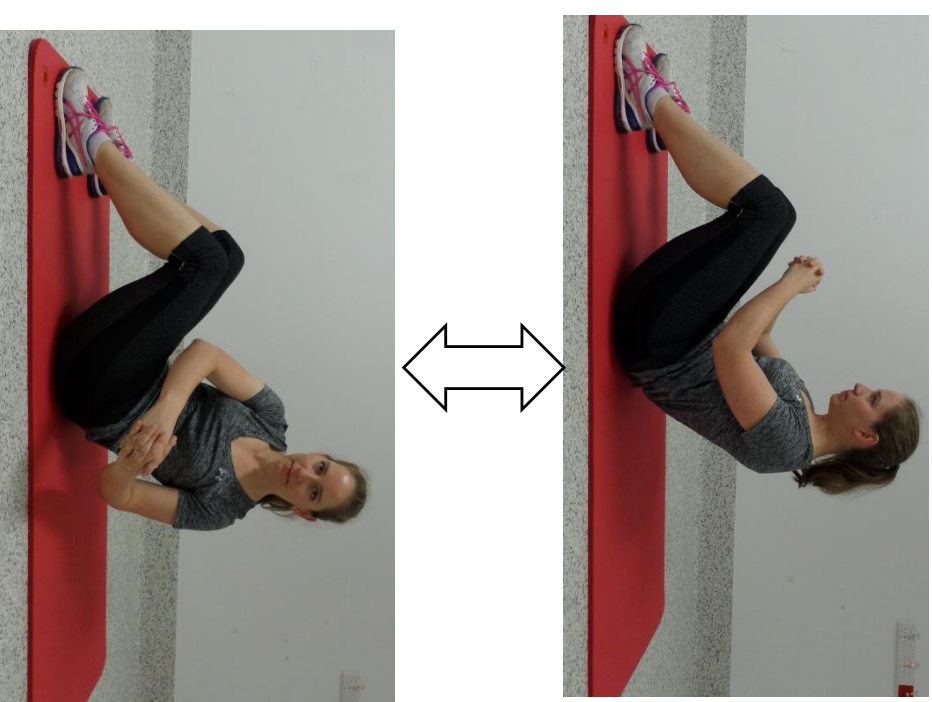

# Oblique Crunches (level 3) - half sit up with weight

## Start position:

Balance with feet flat on floor

## Movement:

Draw in your lower tummy and your pelvic floor as you move your right shoulder to left knee holding a weight in your hands

Repeat alternative sides

## Key points:

Draw in your lower tummy and pelvic floor muscles, breathe

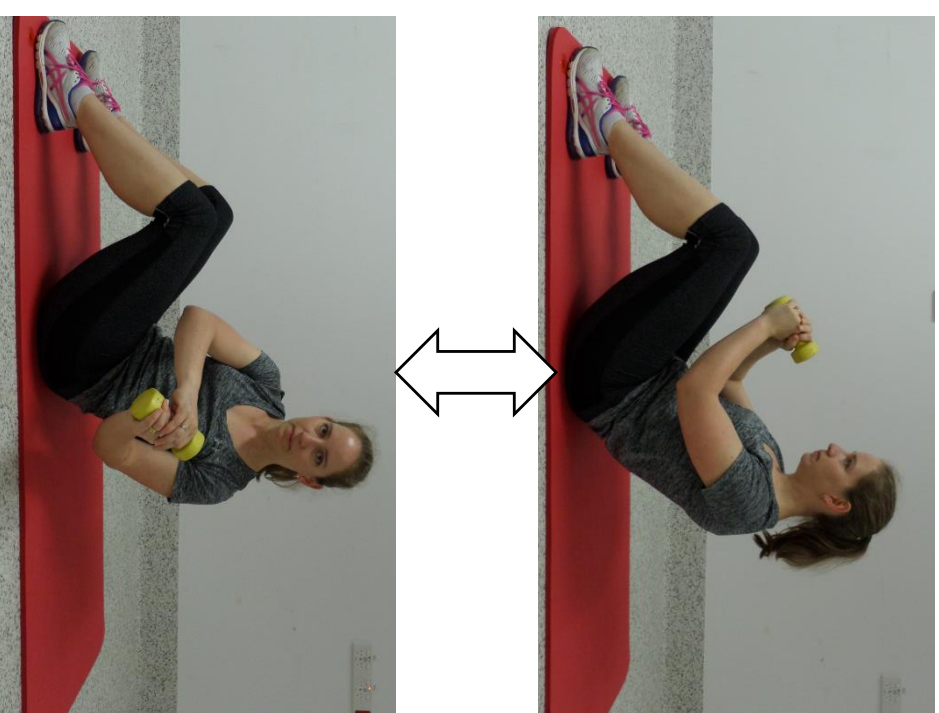



---

## 17. Abbreviations

|        |                                                                                               |
|--------|-----------------------------------------------------------------------------------------------|
| ATHENA | <u>A</u> n exercise <u>t</u> raining and <u>h</u> ealthy <u>e</u> ating group <u>p</u> rogram |
| PFMT   | Pelvic Floor Muscle Training                                                                  |

---

## 18. References

1. National Institute for Health and Care Excellence. Urinary incontinence and pelvic organ prolapse in women: management. UK: NICE; 2019.
2. Berzuk K, Shay B. Effect of increasing awareness of pelvic floor muscle function on pelvic floor dysfunction: a randomized controlled trial. *International Urogynecology Journal*. 2015;26(6):837-44.
3. Langston K, Ross LJ, Byrnes A, Hay R. Secondary-prevention behaviour-change strategy for high-risk patients: Benefits for all classes of body mass index. *Nutrition & Dietetics*. 2020.
